# Supplementary material for: Rules for the design of aza-glycine stabilized triple-helical collagen peptides
Source: Chem Sci. 2020 Jul 21;11(39):10638–46. doi: 10.1039/d0sc03003a (PMC8162259; doi:10.1039/d0sc03003a)
Supplement: SC-011-D0SC03003A-s001 [file SC-011-D0SC03003A-s001.pdf]

SUPPORTING INFORMATION

**Rules for the Design of Aza-Glycine Stabilized Triple-Helical Collagen Peptides**

Samuel D. Melton, Emily A. E. Brackhahn, Samuel J. Orlin, Pengfei Jin, and David M. Chenoweth\*

*Department of Chemistry, University of Pennsylvania, 231 South 34th Street,  
Philadelphia, Pennsylvania 19104-6323, United States*

Table of Contents

|                                                                         |           |
|-------------------------------------------------------------------------|-----------|
| Instrumentation .....                                                   | S02       |
| Reagents.....                                                           | S03       |
| Synthesis, Purification, Sample Preparation, and CD Measurements.....   | S04 – S05 |
| Crystallography .....                                                   | S06       |
| Supporting Figures .....                                                | S07 – S12 |
| MALDI-TOF MS Results, Thermal Denaturation Curves, and HPLC Traces..... | S13 – S61 |
| References .....                                                        | S62 – S63 |

## ABBREVIATIONS

|              |                                                                                                |
|--------------|------------------------------------------------------------------------------------------------|
| Boc          | tert-Butyloxycarbonyl                                                                          |
| CD           | Circular dichroism                                                                             |
| CDT          | 1,1'-Carbonyl-di-(1,2,4-triazole)                                                              |
| CHCA         | $\alpha$ -Cyano-4-hydroxycinnamic acid                                                         |
| CMP          | Collagen model peptide                                                                         |
| COMU         | (1-Cyano-2-ethoxy-2-oxoethylidenaminoxy)dimethylamino-morpholino-carbenium hexafluorophosphate |
| DBU          | 1,8-Diazabicyclo[5.4.0]undec-7-ene                                                             |
| DCM          | Dichloromethane                                                                                |
| DMF          | <i>N,N</i> -Dimethylformamide                                                                  |
| Fmoc         | 9-Fluorenylmethoxycarbonyl                                                                     |
| HOBt         | 1-Hydroxybenzotriazole                                                                         |
| HPLC         | High-performance liquid chromatography                                                         |
| MALDI-TOF MS | Matrix-assisted laser desorption/ionization time-of-flight mass spectrometry                   |
| PBS          | Phosphate-buffered saline                                                                      |
| RT           | Room temperature                                                                               |
| SPPS         | Solid-phase peptide synthesis                                                                  |
| tBu          | tert-Butyl                                                                                     |
| TFA          | Trifluoroacetic acid                                                                           |
| TIPS         | Triisopropylsilane                                                                             |
| TMP          | 2,2,6,6-Tetramethylpiperidine                                                                  |
| Trt          | trityl                                                                                         |

## INSTRUMENTATION

All peptides were purified using preparative or semi-preparative reversed-phase HPLC on an Agilent 1260 Infinity II system using a Phenomenex Gemini 5  $\mu$ m NX-C18 110 Å LC column or a Phenomenex Luna Omega 5  $\mu$ m PS C18 100 Å LC column. Varying gradients of acetonitrile and 0.1% TFA in H<sub>2</sub>O were used depending on the individual CMP. Analytical HPLC (spectra shown for each peptide) to check purity was carried out on an Agilent 1260 Infinity II system using a Phenomenex Gemini 5  $\mu$ m NX-C18 100 Å LC column. Mass spectrometry was performed using a Bruker MALDI-TOF MS Ultraflex III mass spectrometer and CHCA as the matrix. Peptides were either lyophilized using a Labconco FreeZone Plus 12 Liter Cascade Console Freeze Dry system or concentrated using rotary evaporation. UV-Vis absorption spectrophotometry was performed using a Jasco V-650 Spectrophotometer equipped with a PAC-743R multichannel Peltier and 1 cm path length quartz cells. Circular dichroism experiments were performed using a Jasco J-1500 Circular Dichroism Spectrometer and 1 mm quartz cuvettes.

## REAGENTS

All commercially available reagents were used as received. Rink Amide AM Resin was purchased from Novabiochem. CDT and COMU were purchased from Chem-Impex Int'l. Inc. CHCA, DIEA, DMF, and ether were purchased from Sigma-Aldrich. 10X PBS stock solution (sln) was purchased from Fisher. DBU and TFA were purchased from Acros Organics. 9-Fluorenylmethyl carbazate was purchased from Oakwood Chemical. HOBt was purchased from EMD Millipore.

### Fmoc-Amino Acids:

Fmoc-Pro-OH  
Fmoc-Hyp(tBu)-OH  
Fmoc-Gly-OH  
Fmoc-Asp(tBu)-OH  
Fmoc-Glu(tBu)-OH  
Fmoc-Lys(Boc)-OH  
Fmoc-Ser(tBu)-OH  
Fmoc-Thr(tBu)-OH  
Fmoc-Cys(Trt)-OH  
Fmoc-Asn(Trt)-OH  
Fmoc-Gln(Trt)-OH  
Fmoc-Ala-OH  
Fmoc-Val-OH  
Fmoc-Leu-OH  
Fmoc-Ile-OH  
Fmoc-(t-Leu)-OH  
Fmoc-Met-OH  
Fmoc-Phe-OH  
Fmoc-Trp(Boc)-OH  
Fmoc-Tyr(tBu)-OH  
Fmoc-His(Trt)-OH  
Fmoc-*N*-methylglycine-OH  
Fmoc-*N*-ethylglycine-OH  
Fmoc-4-bromo-L-phenylalanine-OH

### Supplier:

Chem-Impex Int'l. Inc.  
Ark Pharm, Inc.  
Chem-Impex Int'l. Inc.  
Chem-Impex Int'l. Inc.  
Novabiochem  
Novabiochem  
Chem-Impex Int'l. Inc.  
Novabiochem  
Novabiochem  
Novabiochem  
Novabiochem  
Chem-Impex Int'l. Inc.  
Novabiochem  
Chem-Impex Int'l. Inc.  
Novabiochem  
Novabiochem  
Chem-Impex Int'l. Inc.  
Novabiochem  
Chem-Impex Int'l. Inc.  
Novabiochem  
Chem-Impex Int'l. Inc.  
Acrotein  
AstaTech Inc.

Fmoc-Pro-Hyp(tBu)-Gly-OH was synthesized using methods previously described by our group<sup>1,2</sup>.

## SYNTHESIS, PURIFICATION, SAMPLE PREPARATION, AND CD MEASUREMENTS

### *a. Resin Preparation*

All peptides were synthesized using manual SPPS. All peptides in this study were prepared on a 0.0125 mmol (1 equivalent) scale on Rink Amide MBHA resin LL (loading density: 0.36 mmol/g). The resin was swelled in DMF for 30 min. All Fmoc group deprotections were performed using 2 mL of a 1% HOBt (w/v), 2% DBU (v/v) in DMF solution and stirring for 1-2 min, repeated twice. The resin was then thoroughly washed with DMF. Finally, a coupling solution containing Fmoc-Pro-Hyp(tBu)-Gly-OH (described below) was added to the resin and stirred for 45 min at 60 °C. The solution was then drained, the resin was washed with DMF, the Fmoc group on the growing peptide chain was removed as previously described, and the resin was washed with DMF to give H-(PO(tBu)G) on resin. For all CMPs except **6c**, **14c**, and **20c** this POG coupling was repeated two times to give H-(POG)<sub>3</sub> on resin, and followed by standard amino acids couplings (described below) with Fmoc-Gly-OH and Fmoc-Hyp(tBu)-OH to give H-(OG)(POG)<sub>3</sub> on resin. For CMPs **6c**, **14c**, and **20c** only one POG coupling was performed.

### *b. Standard Amino Acid Couplings*

Following Fmoc deprotection and washing, amino acid coupling solutions were added to the free amine on the growing peptide chain. The coupling solutions contained 5 equivalents of the appropriate Fmoc-amino acid (listed above), 5 equivalents of COMU, and 7.5 equivalents of TMP in 1 mL of DMF. Prior to addition to resin, the coupling solutions were allowed to sit for 5-10 min. All couplings were done over 45 min at 60 °C with the exception of His, Met, and Cys couplings which were done at RT. The coupling sln was then drained, and the resin was then washed with DMF. The Fmoc group was removed as described above and the resin was washed again with DMF.

### *c. Fmoc-Pro-Hyp(tBu)-Gly-OH Coupling*

The amino acid trimer Fmoc-Pro-Hyp(tBu)-Gly-OH coupling solution was prepared in the same manner as the single amino acids. The coupling solution contained 5 equivalents of Fmoc-Pro-Hyp(tBu)-Gly-OH, 5 equivalents of COMU, and 7.5 equivalents of TMP in 1 mL of DMF. Prior to addition to resin, the coupling solution was allowed to sit for 5-10 min. The coupling solution was stirred with the resin for 45 min at 60 °C before being drained. The resin was then washed with DMF, the Fmoc group was removed using 1 mL of a 1% HOBt (w/v), 2% DBU (v/v) in DMF and stirring for 1 min (x3), and the resin was washed again with DMF. Whenever possible and appropriate, POG coupling solutions were used while synthesizing each CMP.

### *d. Aza-Glycine Couplings and Subsequent Amino Acid Couplings*

Ten equivalents of 9-Fluorenylmethyl carbazate and ten equivalents of CDT were combined in 1 mL of DMF and activated at RT for 5-10 min before being added to the growing peptide chain on resin. The solution and resin were stirred for 24 hr before draining the coupling solution and washing the resin with DMF. The Fmoc group was removed using 1 mL of a 1% HOBt (w/v), 2% DBU (v/v) in DMF and stirring for 1 min (x3), and the resin was washed again with DMF. Following the azGly coupling, a Fmoc-Hyp(tBu)-OH coupling was performed followed by a Fmoc-Pro-OH coupling (as described above) to give H-(POazG)(XOG)(POG)<sub>3</sub> on resin, where "X" represents any given amino acid.

*e. Cleavage from Resin and Precipitation*

Following all appropriate couplings, the final Fmoc group was removed using 1 mL of a 1% HOBt (w/v), 2% DBU (v/v) in DMF and stirring for 1 min (x3), and the resin was washed first with DMF and then with DCM. A 2 mL cleavage cocktail containing 95% TFA, 2.5% TIPS, and 2.5% H<sub>2</sub>O was added to the resin. The mixture was stirred for 2 hr before being collected into cold ether, causing the peptide to precipitate. The solid was collected by centrifugation, resuspended in cold ether, and collected by centrifugation again (3x). The final pellet was then dissolved in 1.5 mL of 50:50 H<sub>2</sub>O:CH<sub>3</sub>CN and stored at 4 °C prior to purification.

*f. Purification*

The peptide solutions were purified using semi-preparative reversed-phase HPLC using acetonitrile and 0.1% TFA in H<sub>2</sub>O. During purification, the column was heated at 60 °C to prevent triple helix formation and aid in separation. The absorbance at 215 nm was monitored to determine collection, collected fractions were analyzed using MALDI-TOF MS in positive ion mode. Appropriate fractions were combined and lyophilized to yield the desired peptide as a white solid. Purity was then checked using analytical HPLC, with the column heated at 60 °C. Please note that in many of the HPLC traces (below), there are peaks that appear around a 3-4 min retention time. These peaks are solvent artifacts resulting from differences in the sample solvent and the HPLC system solvent upon injection, as some of the samples were dissolved in 1X PBS prior to checking purity via analytical HPLC.

*g. Sample Preparation*

After obtaining the pure product, each peptide was then dissolved in a small amount of 1X pH 7.4 PBS. Using UV-Vis spectrophotometry, the concentration of each sample was determined by measuring the absorbance at 214 nm and using an extinction coefficient of 60 mM<sup>-1</sup>cm<sup>-1</sup> as described by Engel *et al.*<sup>3</sup>. The stock solution was then diluted using PBS to a final concentration of 0.2 mM and stored at 4 °C for 24 hr before carrying out CD measurements.

*h. CD Measurements and  $T_m$  Determination*

For each peptide, approximately 200 µL of the 0.2 mM solution was placed into a 1 mm quartz cuvette. The ellipticity of these solutions was then measured from 260 to 190 nm while holding the temperature at 4 °C. Measurements were obtained in triplicate and then converted to mean residue ellipticity and averaged to generate the CD scan curves included for each peptide below. Following this, the solutions were then heated at a rate of 12 °C/hr starting at 5 °C and ending at 92 °C while monitoring the absorbance at 210, 215, 220, and 225 nm. These measurements, obtained in triplicate, were converted to mean residue ellipticity and averaged. The melting temperature for each peptide,  $T_m$ , was determined by using the program GraphPad Prism 7 by fitting the data to a two-state model to find the temperature at which 50% of starting ellipticity was lost, as described previously<sup>1</sup>.

## CRYSTALLOGRAPHY

### a. Crystallization

Peptide stock concentrations were determined using UV-Vis. The absorption was measured at 214 nm and used an extinction coefficient of  $60 \text{ mM}^{-1} \text{ cm}^{-1}$  was used.

**CMP 24.** Peptide **24** was crystallized using sitting-vapor drop diffusion under conditions adapted from Okuyama *et. al.*<sup>4</sup> The peptide stock was prepared at a concentration of 12 mg/mL. Crystal trials were performed using 1  $\mu\text{L}$  of the peptide solution and 1  $\mu\text{L}$  of the reservoir solution of 0.1 M  $\text{Li}_2\text{SO}_4 \cdot \text{H}_2\text{O}$ , 0.094 M Tris-HCl, and 30% (w/v) PEG 4000 at pH 7.6. Trays were incubated at RT for two months. Prior to beamline analysis, crystals were dipped in a drop of cryoprotectant mixture consisting of 20% glycerol mixed with 80% reservoir solution.

**CMP 25.** Peptide **25** was crystallized using the PEG/Ion HT screen purchased from Hampton Research. The peptide stock was prepared at a concentration of 10 mg/mL. Crystal trials were performed using 200 nL of the peptide solution and 200 nL of the reservoir solution of 0.2 M potassium formate and 20% PEG 3350 at pH 7.3. Trays were incubated at 4 °C for approximately three months before being moved to RT for two months. Prior to beamline analysis, crystals were dipped in a drop of cryoprotectant mixture consisting of 20% glycerol mixed with 80% reservoir solution.

### b. Data Collection, Refinement, and Analysis

Crystal data integration was performed with XDS<sup>5</sup> and iMOSFLM<sup>6</sup> (ver 7.2.2). Space group validation and data reduction was performed using Aimless<sup>7</sup> (ver 0.7.4) in the CCP4<sup>8</sup> (ver 7.0.078) software suite. Molecular replacement (MR) was performed using Phaser<sup>9</sup>. MR search models consisted of full length triple helical collagen structures and truncated triple helical collagen structures modified to be short  $(\text{Ala-Ala-Gly})_n$  sequences. Crystallographic restraints files for *N*-methylglycine, 4-bromophenylalanine, and the C-terminal amidated glycine residues were generated using eLBOW<sup>10</sup>. Refinement was performed using Phenix<sup>11</sup> (ver 1.17.1-3660). Manual model building was performed using Coot<sup>12</sup> (ver 0.8.9.2).

### c. PDB Analysis

The comprehensive list of all structures examined is as follows: 1A3I, 1A3J, 1BKV, 1CAG, 1CGD, 1EI8, 1G9W, 1ITT, 1K6F, 1Q7D, 1QSU, 1V4F, 1V6Q, 1V7H, 1X1K, 2CUO, 2D3F, 2D3H, 2DRT, 2DRX, 3A0A, 3A0M, 3A1H, 3A08, 3A19, 3ABN, 3ADM, 3AH9, 3B0S, 3B2C, 3DMW, 3P46, 3POD, 3PON, 3T4F, 3U29, 3WN8, 4AXY, 4DMT, 4GYX, 4OY5, 4Z1R, 5K86, 5Y46, 6A0C, 6HG7, 6JEC, and 6JKL. These structures were chosen as they contained only the collagen triple helix in their crystal structure and present a variety of primary sequences. Within each structure, the distance between the nearest water molecule to the  $\text{C}\alpha$  of every glycine residue and the backbone N of every Xaa position residue was measured using the UCSF Chimera software package.<sup>13</sup> Additionally, UCSF Chimera was used to measure the phi and psi angles for each structure.

# SUPPORTING FIGURES

|                                        |                             |
|----------------------------------------|-----------------------------|
| Beamline                               | NSLS-II 17-ID-1 (AMX)       |
| Detector                               | Dectris Eiger 9M            |
| Wavelength (Å)                         | 0.91976                     |
| Resolution range (Å)                   | 37.24 - 1.25 (1.295 - 1.25) |
| Space group                            | $P 2_1$                     |
| Unique reflections                     | 16476 (1611)                |
| Unit cell                              |                             |
| ( $a$ , $b$ , $c$ ; Å)                 | 37.300, 19.680, 40.810      |
| ( $\alpha$ , $\beta$ , $\gamma$ ; °)   | 90.00, 93.26, 90.00         |
| Multiplicity                           | 2.9 (3.0)                   |
| Completeness (%)                       | 97.48 (96.44)               |
| Mean $I/\sigma_I$                      | 5.7 (1.7)                   |
| Wilson B-factor (Å <sup>2</sup> )      | 8.83                        |
| $R_{\text{merge}}$                     | 0.115 (1.081)               |
| $R_{\text{meas}}$                      | 0.141 (1.314)               |
| $R_{\text{pim}}$                       | 0.080 (0.736)               |
| $CC_{1/2}$                             | 0.994 (0.574)               |
| Reflections used in refinement         | 16381 (1598)                |
| Reflections used for $R_{\text{free}}$ | 1633 (157)                  |
| $R_{\text{work}}$                      | 0.1874 (0.2775)             |
| $R_{\text{free}}$                      | 0.2267 (0.3227)             |
| Number of non-hydrogen atoms           | 793                         |
| Macromolecules                         | 610                         |
| Ligands                                | 31                          |
| Solvent                                | 152                         |
| Amino acid residues                    | 90                          |
| RMSD                                   |                             |
| Bonds (Å)                              | 0.01                        |
| Angles (°)                             | 1.34                        |
| Ramachandran favored (%)               | 100                         |
| Ramachandran allowed (%)               | 0                           |
| Ramachandran outliers (%)              | 0                           |
| Rotamer outliers (%)                   | 0                           |
| Clashscore                             | 0.79                        |
| Average B-factor (Å <sup>2</sup> )     | 16.2                        |
| Macromolecules                         | 13.59                       |
| Ligands                                | 38.9                        |
| Solvent                                | 22.07                       |

**Table S1.** Crystallography table for CMP **24** (PDB accession code: 6W46).

|                                        |                            |
|----------------------------------------|----------------------------|
| Beamline                               | APS 24-ID-C                |
| Detector                               | DECTRIS PILATUS 6M-F       |
| Wavelength (Å)                         | 0.97918                    |
| Resolution range (Å)                   | 31.3 - 1.15 (1.191 - 1.15) |
| Space group                            | $P 2_1$                    |
| Unique reflections                     | 15857 (1215)               |
| Unit cell                              |                            |
| ( $a$ , $b$ , $c$ ; Å)                 | 31.679, 19.556, 37.528     |
| ( $\alpha$ , $\beta$ , $\gamma$ ; °)   | 90.00, 98.915, 90.00       |
| Multiplicity                           | 4.6 (3.1)                  |
| Completeness (%)                       | 95.75 (75.50)              |
| Mean $I/\sigma_I$                      | 9.4 (2.8)                  |
| Wilson B-factor (Å <sup>2</sup> )      | 8.06                       |
| $R_{\text{merge}}$                     | 0.107 (0.646)              |
| $R_{\text{meas}}$                      | 0.122 (0.796)              |
| $R_{\text{pim}}$                       | 0.072 (0.530)              |
| $CC_{1/2}$                             | 0.995 (0.823)              |
| Reflections used in refinement         | 15798 (1211)               |
| Reflections used for $R_{\text{free}}$ | 1581 (122)                 |
| $R_{\text{work}}$                      | 0.1834 (0.2676)            |
| $R_{\text{free}}$                      | 0.2172 (0.2715)            |
| Number of non-hydrogen atoms           | 608                        |
| Macromolecules                         | 483                        |
| Ligands                                | 29                         |
| Solvent                                | 96                         |
| Amino acid residues                    | 78                         |
| RMSD                                   |                            |
| Bonds (Å)                              | 0.011                      |
| Angles (°)                             | 1.3                        |
| Ramachandran favored (%)               | 100                        |
| Ramachandran allowed (%)               | 0                          |
| Ramachandran outliers (%)              | 0                          |
| Rotamer outliers (%)                   | 0                          |
| Clashscore                             | 1.02                       |
| Average B-factor (Å <sup>2</sup> )     | 13.1                       |
| Macromolecules                         | 12.31                      |
| Ligands                                | 15.88                      |
| Solvent                                | 16.29                      |

**Table S2.** Crystallography table for CMP **25** (PDB accession code: 6W47).

| Phi Angles of PDB: 6W46 (Xaa: Val) |            |         |         |         |          | Psi Angles of PDB: 6W46 (Xaa: Val) |            |         |         |         |          |
|------------------------------------|------------|---------|---------|---------|----------|------------------------------------|------------|---------|---------|---------|----------|
| Residue No.                        | Amino Acid | Chain A | Chain B | Chain C | Avg. All | Residue No.                        | Amino Acid | Chain A | Chain B | Chain C | Avg. All |
| 4                                  | Pro        | -70     | -69     | -73     | -71      | 4                                  | Pro        | 153     | 158     | 165     | 159      |
| 5                                  | Hyp        | -56     | -55     | -56     | -56      | 5                                  | Hyp        | 148     | 146     | 149     | 148      |
| 6                                  | Gly        | -70     | -63     | -67     | -66      | 6                                  | Gly        | 176     | 173     | 171     | 173      |
| 7                                  | Pro        | -64     | -63     | -66     | -64      | 7                                  | Pro        | 160     | 157     | 159     | 159      |
| 8                                  | Arg        | -59     | -64     | -62     | -62      | 8                                  | Arg        | 145     | 145     | 146     | 145      |
| 9                                  | Gly        | -70     | -69     | -68     | -69      | 9                                  | Gly        | 172     | 172     | 175     | 173      |
| 10                                 | Pro        | -79     | -76     | -76     | -77      | 10                                 | Pro        | 166     | 164     | 167     | 165      |
| 11                                 | Hyp        | -60     | -55     | -65     | -60      | 11                                 | Hyp        | 147     | 147     | 153     | 149      |
| 12                                 | Gly        | -64     | -73     | -70     | -69      | 12                                 | Gly        | 167     | 179     | 177     | 175      |
| 13                                 | Pro        | -66     | -71     | -67     | -68      | 13                                 | Pro        | 161     | 163     | 161     | 162      |
| 14                                 | Hyp        | -63     | -59     | -63     | -62      | 14                                 | Hyp        | 156     | 151     | 151     | 153      |
| 15                                 | Gly        | -62     | -63     | -58     | -61      | 15                                 | Gly        | 174     | 166     | 162     | 167      |
| 16                                 | Val        | -71     | -58     | -68     | -66      | 16                                 | Val        | 161     | 147     | 159     | 156      |
| 17                                 | Hyp        | -59     | -60     | -60     | -59      | 17                                 | Hyp        | 146     | 148     | 146     | 147      |
| 18                                 | Gly        | -65     | -65     | -66     | -65      | 18                                 | Gly        | 166     | 162     | 171     | 166      |
| 19                                 | Pro        | -70     | -67     | -75     | -71      | 19                                 | Pro        | 156     | 161     | 165     | 160      |
| 20                                 | Hyp        | -57     | -61     | -52     | -57      | 20                                 | Hyp        | 144     | 150     | 146     | 147      |
| 21                                 | Gly        | -67     | -68     | -71     | -69      | 21                                 | Gly        | 174     | 175     | -178    | 57       |
| 22                                 | Pro        | -66     | -62     | -64     | -64      | 22                                 | Pro        | 163     | 158     | 156     | 159      |
| 23                                 | Hyp        | -58     | -56     | -62     | -59      | 23                                 | Hyp        | 150     | 148     | 152     | 150      |
| 24                                 | Gly        | -68     | -68     | -66     | -67      | 24                                 | Gly        | 176     | 172     | 168     | 172      |
| 25                                 | BrF        | -71     | -69     | -72     | -70      | 25                                 | BrF        | 154     | 154     | 161     | 156      |
| 26                                 | Hyp        | -60     | -60     | -60     | -60      | 26                                 | Hyp        | 154     | 151     | 148     | 151      |
| 27                                 | Gly        | -70     | -68     | -66     | -68      | 27                                 | Gly        | 173     | 173     | 171     | 172      |

**Table S3.** Measured phi and psi angles of CMP **24**, containing the Xaa position Val residue. The first and last three terminal residues of the CMP have been excluded to account for the one-residue stagger of the collagen triple helix and helical fraying. The Xaa position residue, Val, is highlighted in blue and the adjacent Gly residue is highlighted in green.

| Phi Angles of PDB: 6W47 (Xaa: NmetG) |            |         |         |         |         | Psi Angles of PDB: 6W47 (Xaa: NmetG) |            |         |         |         |         |
|--------------------------------------|------------|---------|---------|---------|---------|--------------------------------------|------------|---------|---------|---------|---------|
| Residue No.                          | Amino Acid | Chain A | Chain B | Chain C | Avg All | Residue No.                          | Amino Acid | Chain A | Chain B | Chain C | Avg All |
| 4                                    | Pro        | -60     | -73     | -65     | -66     | 4                                    | Pro        | 153     | 163     | 157     | 157     |
| 5                                    | Hyp        | -58     | -54     | -55     | -56     | 5                                    | Hyp        | 141     | 145     | 152     | 146     |
| 6                                    | Gly        | -70     | -67     | -69     | -69     | 6                                    | Gly        | 168     | 172     | 168     | 170     |
| 7                                    | Pro        | -72     | -66     | -70     | -69     | 7                                    | Pro        | 154     | 147     | 156     | 152     |
| 8                                    | Arg        | -63     | -62     | -66     | -64     | 8                                    | Arg        | 146     | 146     | 145     | 145     |
| 9                                    | Gly        | -67     | -66     | -67     | -66     | 9                                    | Gly        | 169     | 165     | 168     | 168     |
| 10                                   | Pro        | -70     | -72     | -75     | -72     | 10                                   | Pro        | 152     | 163     | 164     | 160     |
| 11                                   | Hyp        | -55     | -65     | -60     | -60     | 11                                   | Hyp        | 148     | 157     | 150     | 152     |
| 12                                   | Gly        | -65     | -70     | -74     | -70     | 12                                   | Gly        | 170     | 171     | 177     | 173     |
| 13                                   | Pro        | -69     | -75     | -63     | -69     | 13                                   | Pro        | 161     | 164     | 156     | 160     |
| 14                                   | Hyp        | -53     | -49     | -54     | -52     | 14                                   | Hyp        | 142     | 147     | 147     | 145     |
| 15                                   | Gly        | -65     | -66     | -63     | -65     | 15                                   | Gly        | 170     | 176     | 168     | 171     |
| 16                                   | Pro        | -69     | -68     | -68     | -68     | 16                                   | Pro        | 160     | 156     | 160     | 159     |
| 17                                   | Hyp        | -58     | -60     | -60     | -59     | 17                                   | Hyp        | 150     | 153     | 150     | 151     |
| 18                                   | Gly        | -72     | -68     | -63     | -68     | 18                                   | Gly        | 179     | 174     | 174     | 176     |
| 19                                   | NmetG      | -76     | -79     | -81     | -79     | 19                                   | NmetG      | 178     | 176     | -177    | 59      |
| 20                                   | Hyp        | -66     | -69     | -67     | -67     | 20                                   | Hyp        | 151     | 155     | 148     | 151     |
| 21                                   | Gly        | -65     | -69     | -69     | -67     | 21                                   | Gly        | 171     | -179    | 176     | 56      |
| 22                                   | Pro        | -67     | -72     | -63     | -67     | 22                                   | Pro        | 160     | 163     | 154     | 159     |
| 23                                   | Hyp        | -63     | -57     | -60     | -60     | 23                                   | Hyp        | 152     | 146     | 150     | 149     |
| 24                                   | Gly        | -70     | -68     | -73     | -70     | 24                                   | Gly        | 171     | 173     | 172     | 172     |

**Table S4.** Measured phi and psi angles of CMP **25**, containing the Xaa position NmetG residue. The first and last three terminal residues of the CMP have been excluded to account for the one-residue stagger of the collagen triple helix and helical fraying. The Xaa position residue, NmetG, is highlighted in blue and the adjacent Gly residue is highlighted in green.

## MALDI-TOF MASS SPECTROMETRY RESULTS, THERMAL DENATURATION CURVES, AND HPLC TRACES

CMP 2a: H-(Pro-Hyp-Gly)<sub>3</sub>(Pro-Hyp-Gly)(**Hyp**-Hyp-Gly)(Pro-Hyp-Gly)<sub>3</sub>-NH<sub>2</sub>

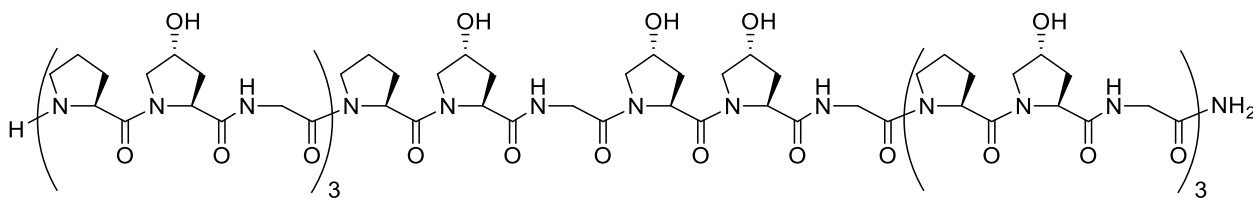

### MALDI-TOF MS:

Calculated [M+Na]<sup>+</sup>: 2193.990

Found: 2193.711

### THERMAL DENATURATION CURVE:

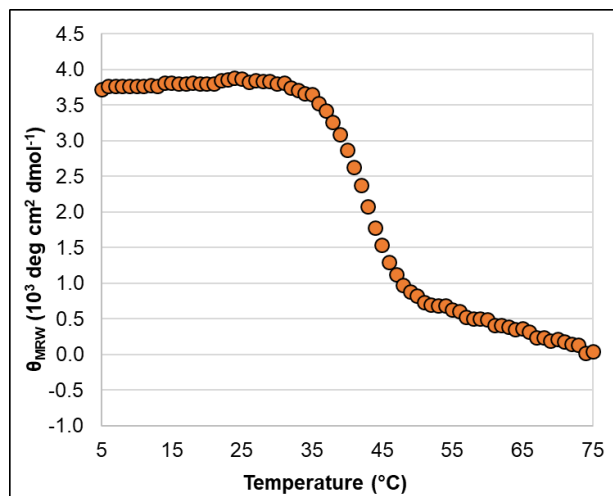

HPLC: 5-25% CH<sub>3</sub>CN in 0.1% TFA H<sub>2</sub>O over 30 min at 60 °C

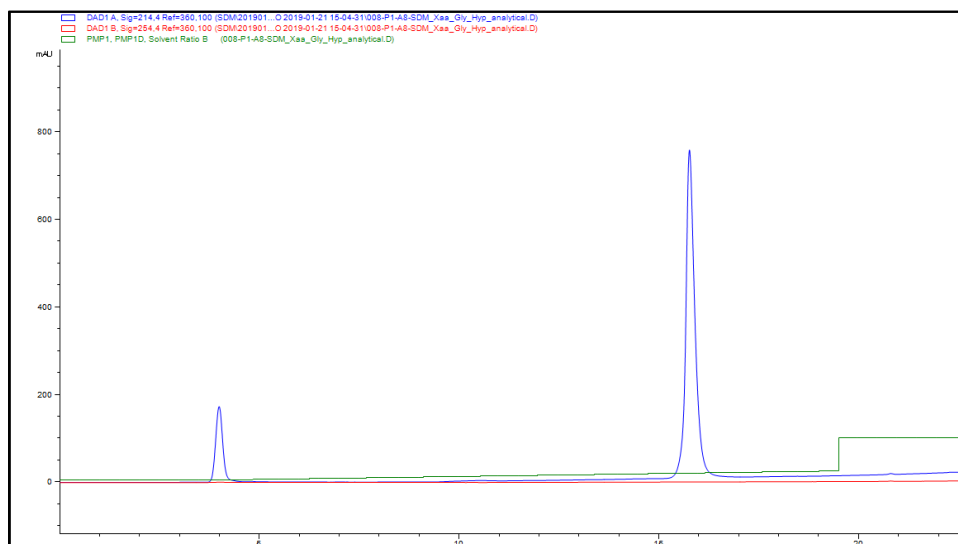

CMP **2b**: H-(Pro-Hyp-Gly)<sub>3</sub>(Pro-Hyp-azGly)(Hyp-Hyp-Gly)(Pro-Hyp-Gly)<sub>3</sub>-NH<sub>2</sub>

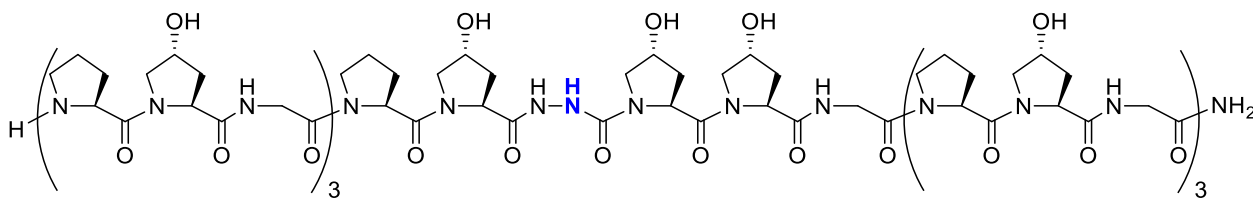

#### MALDI-TOF MS:

Calculated [M+Na]<sup>+</sup>: 2194.985

Found: 2194.751

#### THERMAL DENATURATION CURVE:

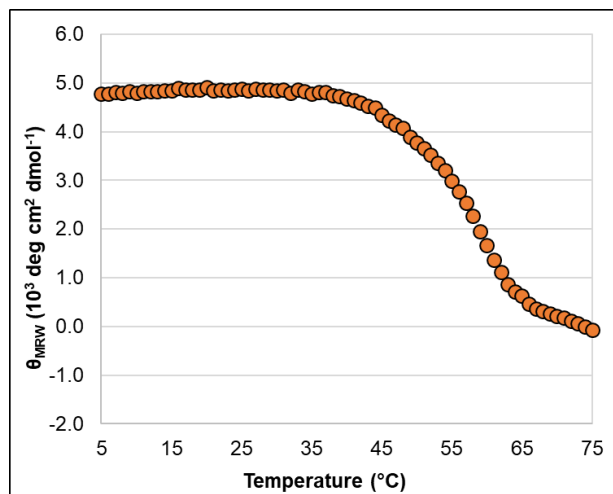

HPLC: 1-25% CH<sub>3</sub>CN in 0.1% TFA H<sub>2</sub>O over 30 min at 60 °C

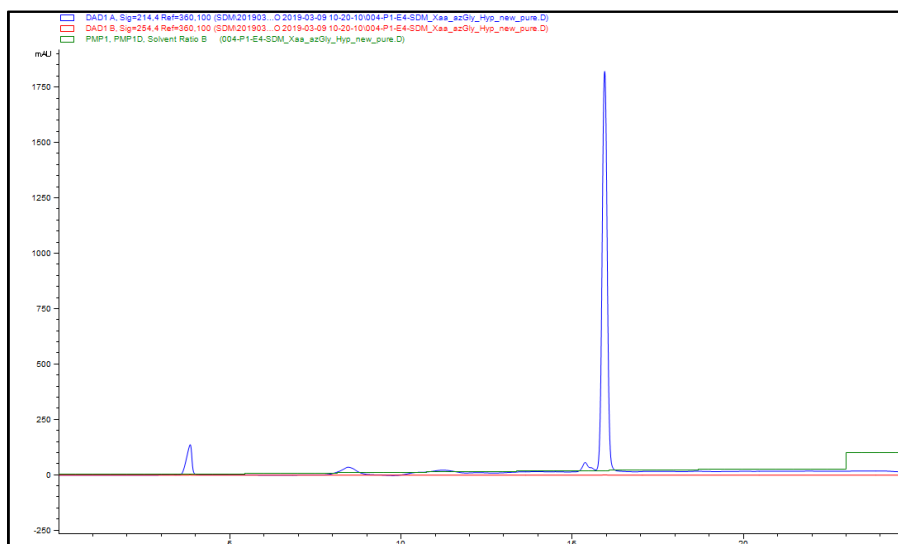

**CMP 3a:** H-(Pro-Hyp-Gly)<sub>3</sub>(Pro-Hyp-Gly)(**Asp**-Hyp-Gly)(Pro-Hyp-Gly)<sub>3</sub>-NH<sub>2</sub>

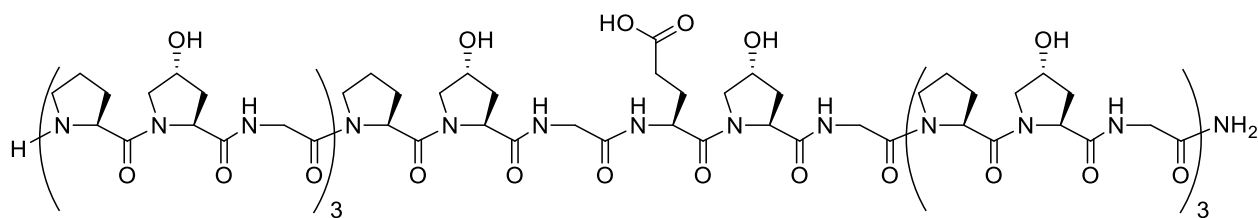

#### MALDI-TOF MS:

Calculated [M+Na]<sup>+</sup>: 2195.969

Found: 2196.033

#### THERMAL DENATURATION CURVE:

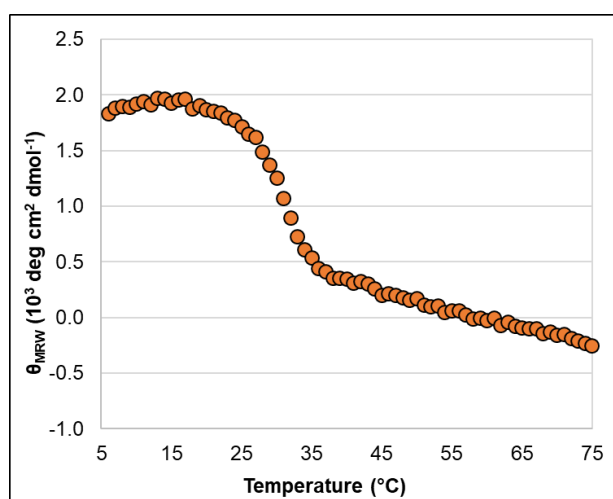

**HPLC:** 1-25% CH<sub>3</sub>CN in 0.1% TFA H<sub>2</sub>O over 30 min at 60 °C

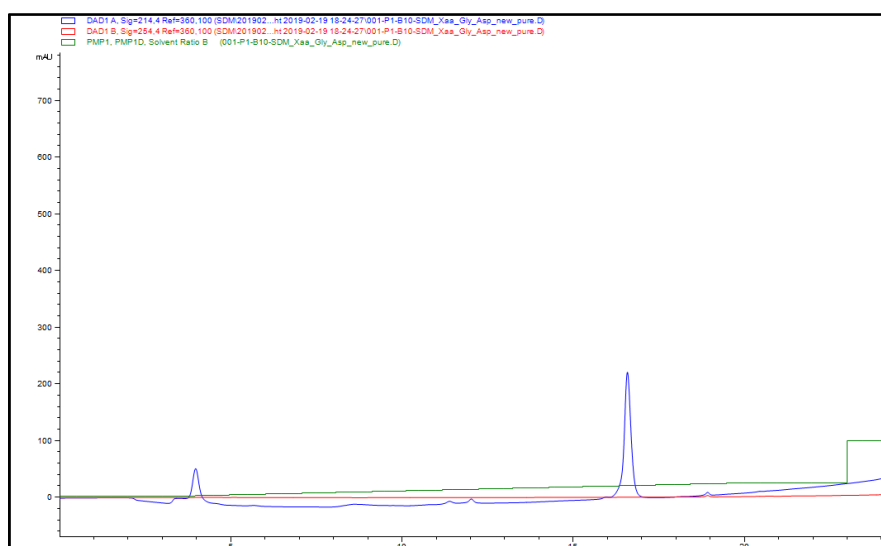

CMP **3b**: H-(Pro-Hyp-Gly)<sub>3</sub>(Pro-Hyp-azGly)(Asp-Hyp-Gly)(Pro-Hyp-Gly)<sub>3</sub>-NH<sub>2</sub>

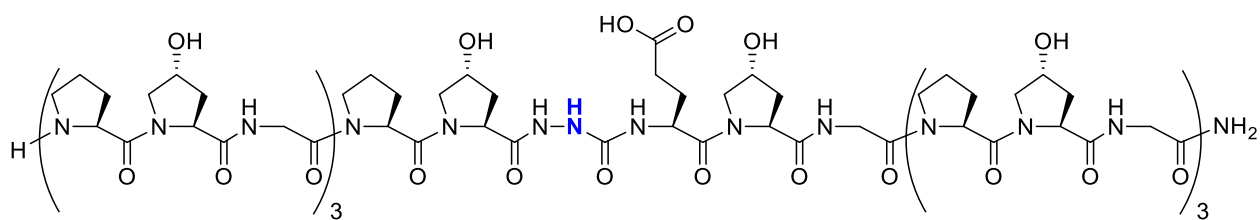

#### MALDI-TOF MS:

Calculated [M+Na]<sup>+</sup>: 2196.964

Found: 2196.901

#### THERMAL DENATURATION CURVE:

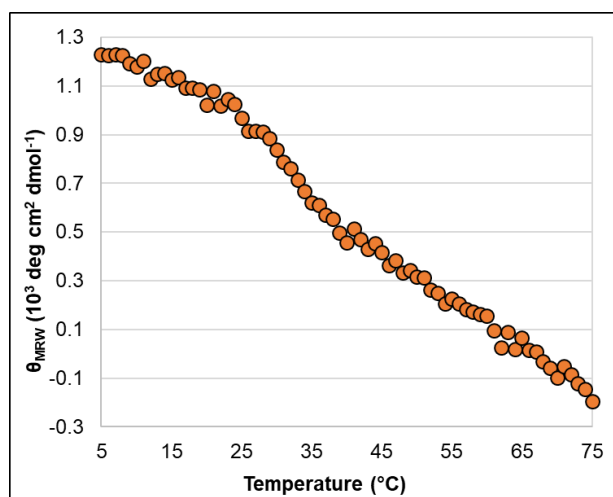

HPLC: 1-25% CH<sub>3</sub>CN in 0.1% TFA H<sub>2</sub>O over 30 min at 60 °C

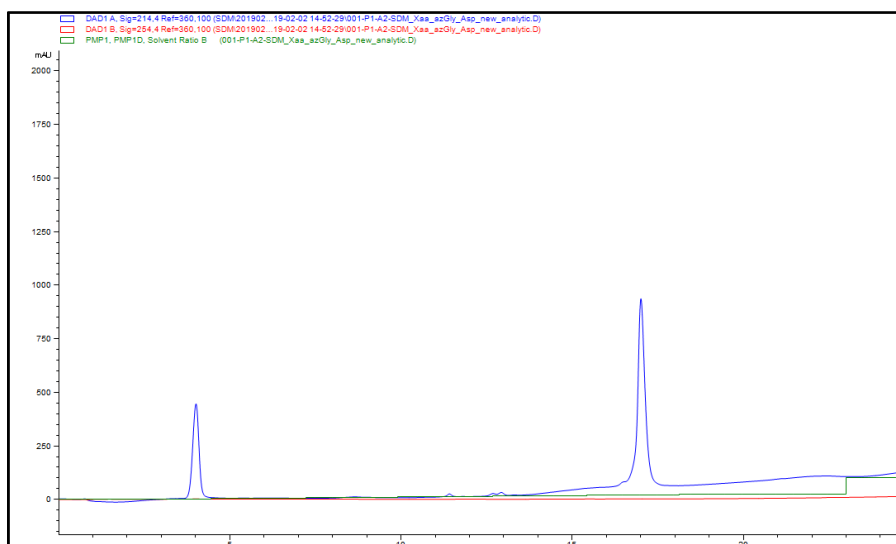

**CMP 4a:** H-(Pro-Hyp-Gly)<sub>3</sub>(Pro-Hyp-Gly)(**Glu**-Hyp-Gly)(Pro-Hyp-Gly)<sub>3</sub>-NH<sub>2</sub>

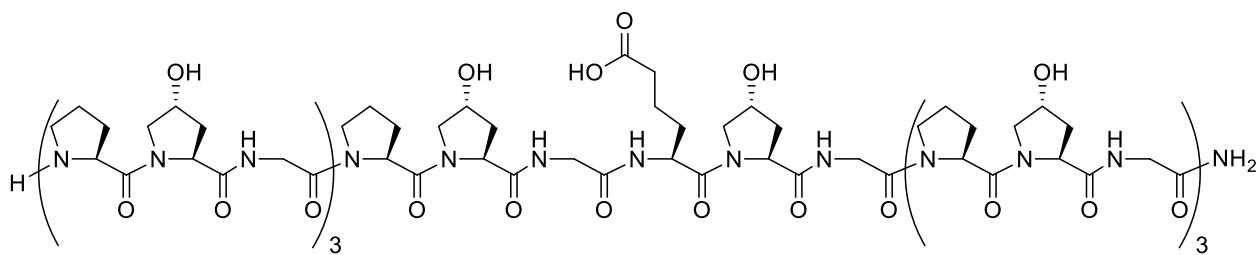

#### MALDI-TOF MS:

Calculated [M+Na]<sup>+</sup>: 2209.945

Found: 2210.235

#### THERMAL DENATURATION CURVE:

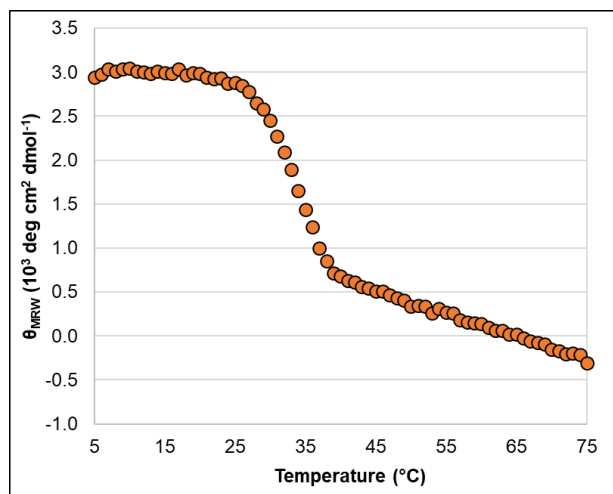

**HPLC:** 1-25% CH<sub>3</sub>CN in 0.1% TFA H<sub>2</sub>O over 30 min at 60  $^{\circ}\text{C}$

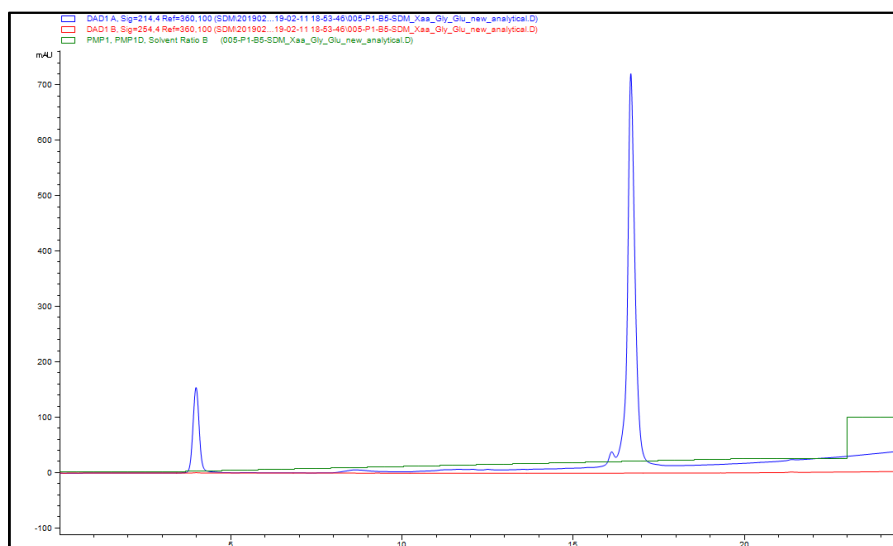

CMP **4b**: H-(Pro-Hyp-Gly)<sub>3</sub>(Pro-Hyp-azGly)(Glu-Hyp-Gly)(Pro-Hyp-Gly)<sub>3</sub>-NH<sub>2</sub>

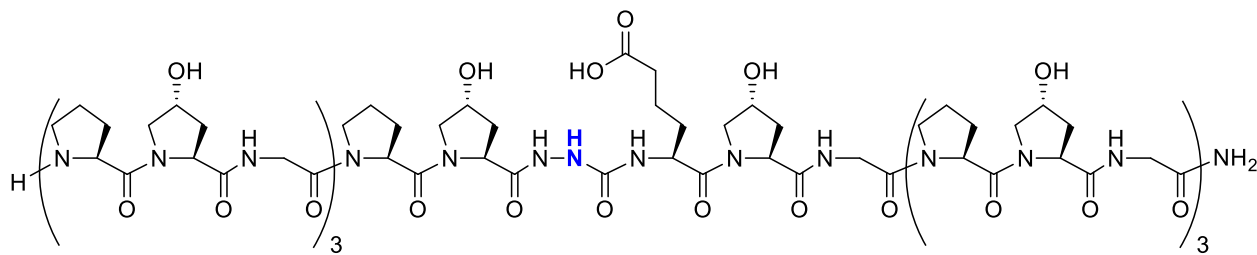

#### MALDI-TOF MS:

Calculated [M+Na]<sup>+</sup>: 2210.940

Found: 2211.649

#### THERMAL DENATURATION CURVE:

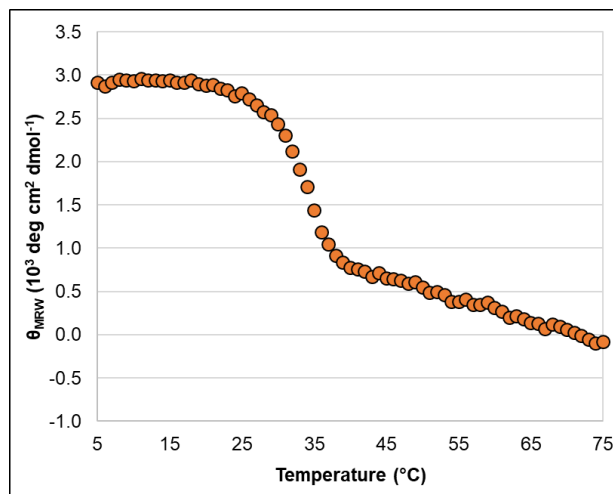

HPLC: 5-45% CH<sub>3</sub>CN in 0.1% TFA H<sub>2</sub>O over 30 min at 80 °C

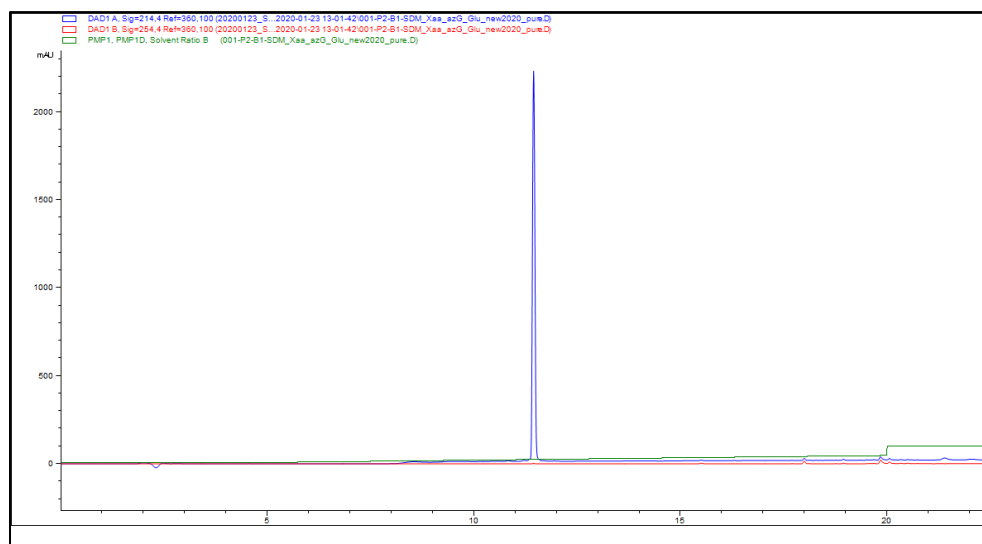

CMP 5a: H-(Pro-Hyp-Gly)<sub>3</sub>(Pro-Hyp-Gly)(**Lys**-Hyp-Gly)(Pro-Hyp-Gly)<sub>3</sub>-NH<sub>2</sub>

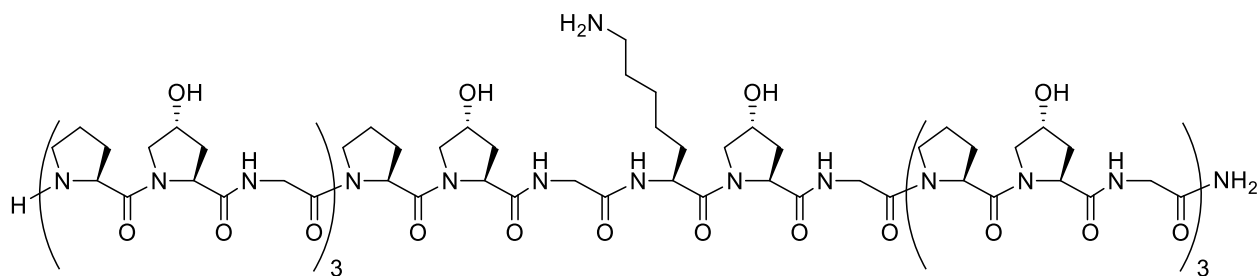

#### MALDI-TOF MS:

Calculated [M+Na]<sup>+</sup>: 2209.037

Found: 2208.890

#### THERMAL DENATURATION CURVE:

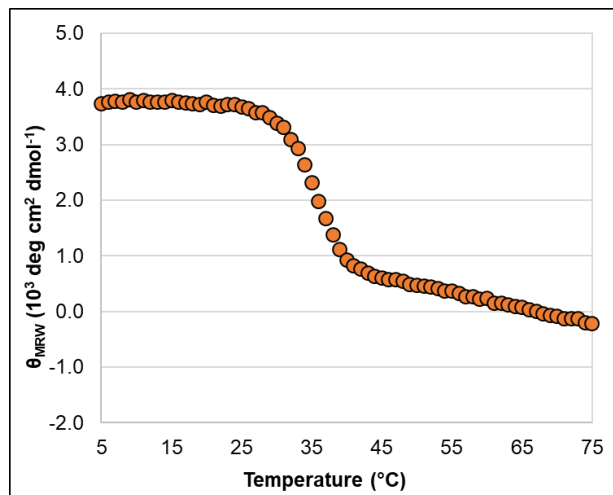

HPLC: 5-25% CH<sub>3</sub>CN in 0.1% TFA H<sub>2</sub>O over 30 min at 60 °C

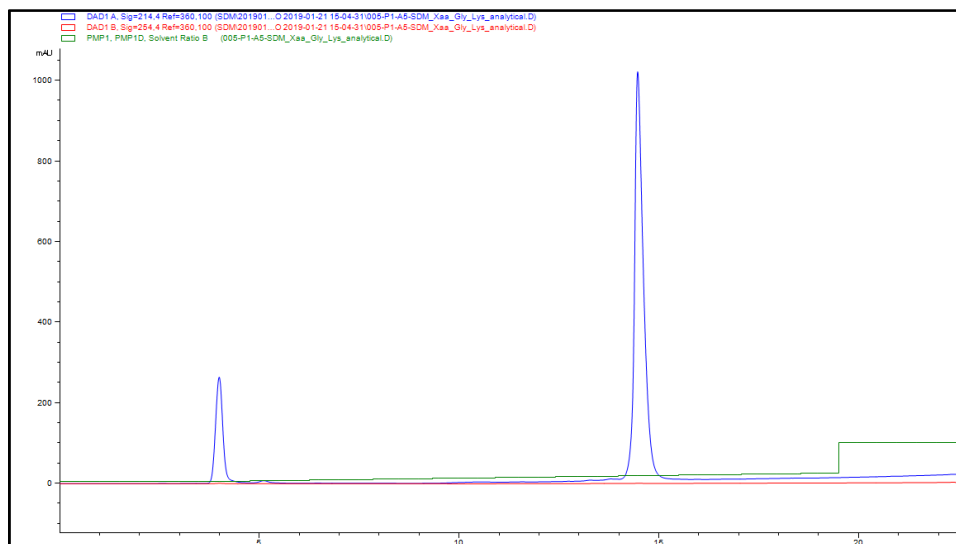

CMP **5b**: H-(Pro-Hyp-Gly)<sub>3</sub>(Pro-Hyp-azGly)(Lys-Hyp-Gly)(Pro-Hyp-Gly)<sub>3</sub>-NH<sub>2</sub>

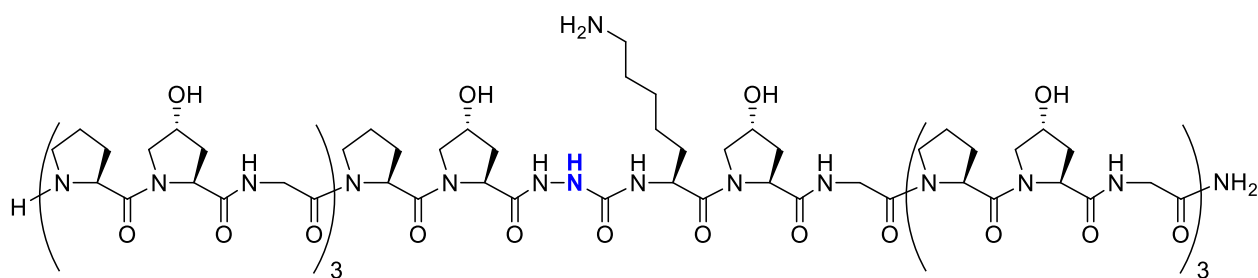

#### MALDI-TOF MS:

Calculated [M+Na]<sup>+</sup>: 2210.032

Found: 2210.063

#### THERMAL DENATURATION CURVE:

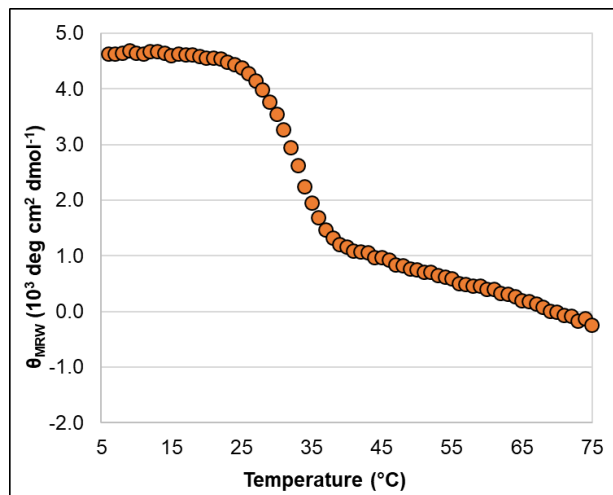

HPLC: 1-25% CH<sub>3</sub>CN in 0.1% TFA H<sub>2</sub>O over 30 min at 60 °C

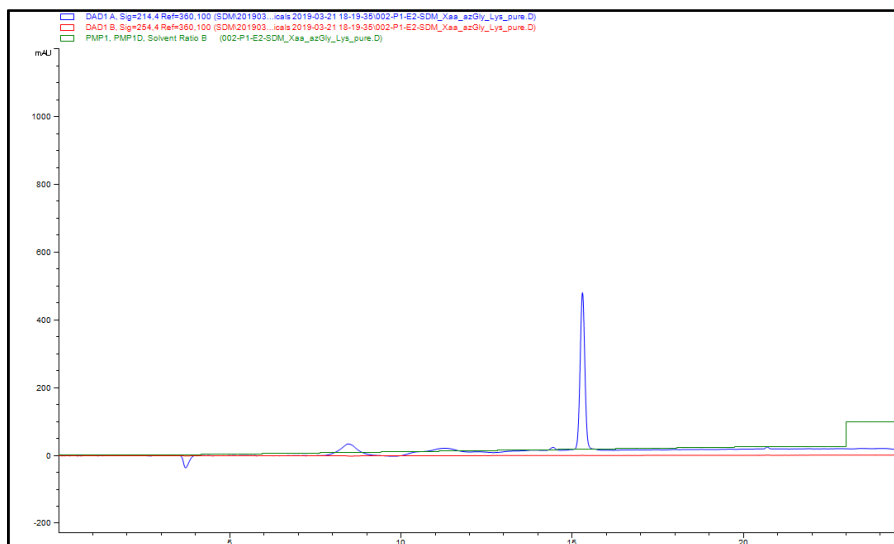

**CMP 6a:** H-(Pro-Hyp-Gly)<sub>3</sub>(Pro-Hyp-Gly)(**Arg**-Hyp-Gly)(Pro-Hyp-Gly)<sub>3</sub>-NH<sub>2</sub>

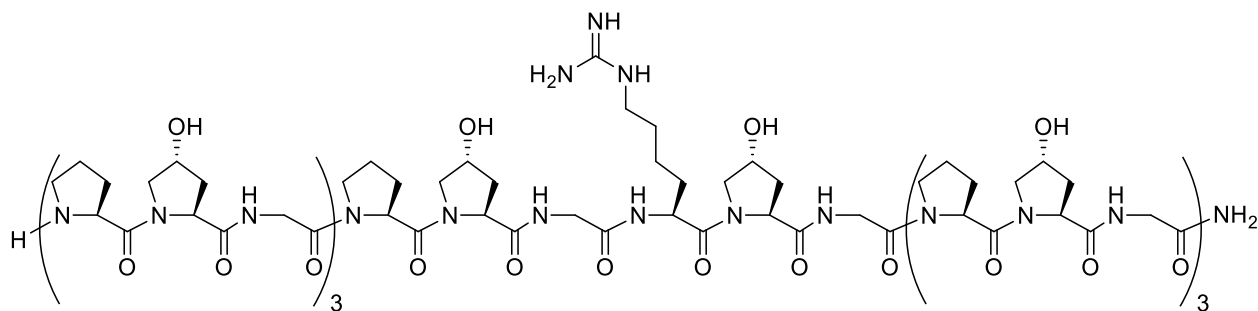

#### MALDI-TOF MS:

Calculated [M+Na]<sup>+</sup>: 2237.043

Found: 2237.031

#### THERMAL DENATURATION CURVE:

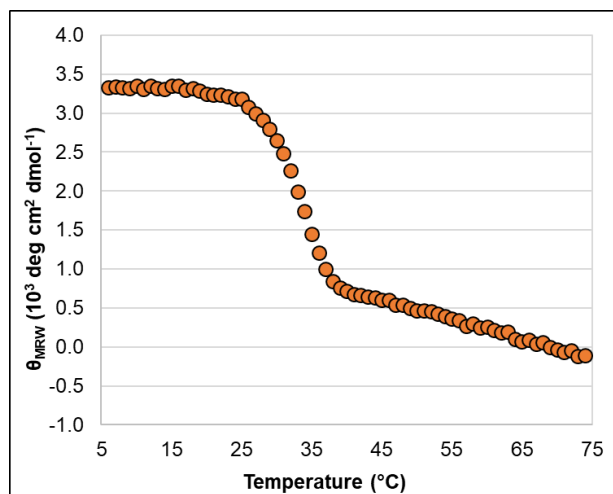

**HPLC:** 1-25% CH<sub>3</sub>CN in 0.1% TFA H<sub>2</sub>O over 30 min at 60 °C

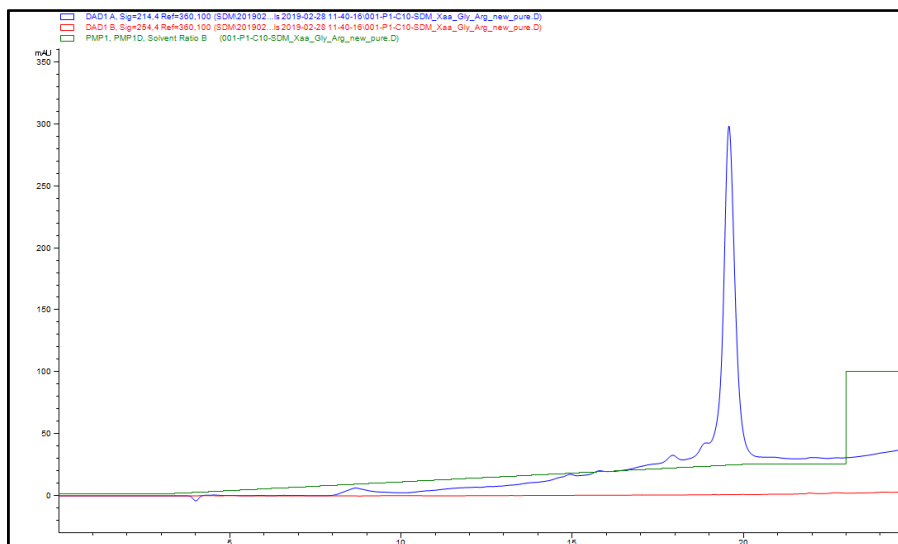

CMP **6b**: H-(Pro-Hyp-Gly)<sub>3</sub>(Pro-Hyp-azGly)(Arg-Hyp-Gly)(Pro-Hyp-Gly)<sub>3</sub>-NH<sub>2</sub>

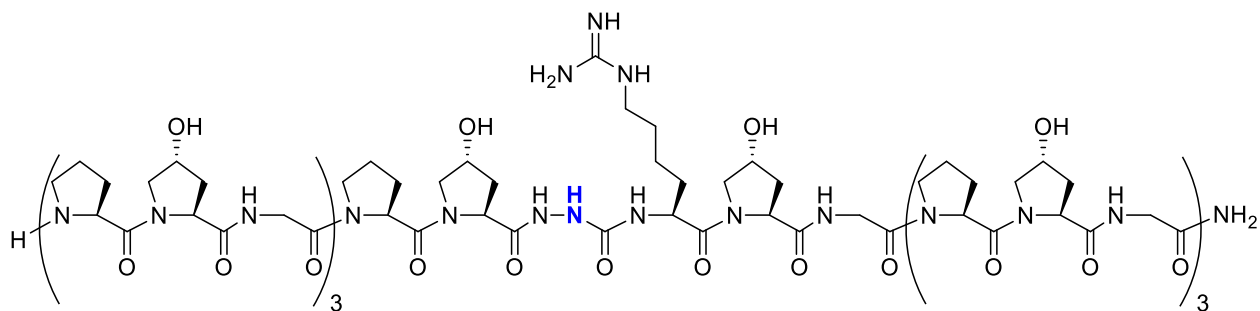

#### MALDI-TOF MS:

Calculated [M+Na]<sup>+</sup>: 2238.038

Found: 2237.691

#### THERMAL DENATURATION CURVE:

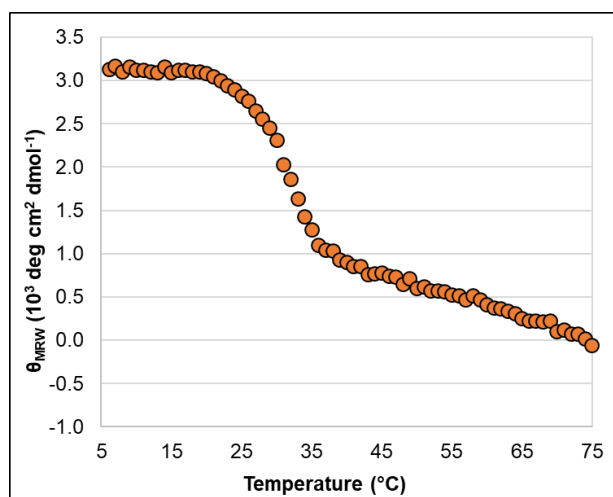

HPLC: 1-40% CH<sub>3</sub>CN in 0.1% TFA H<sub>2</sub>O over 30 min at 60 °C

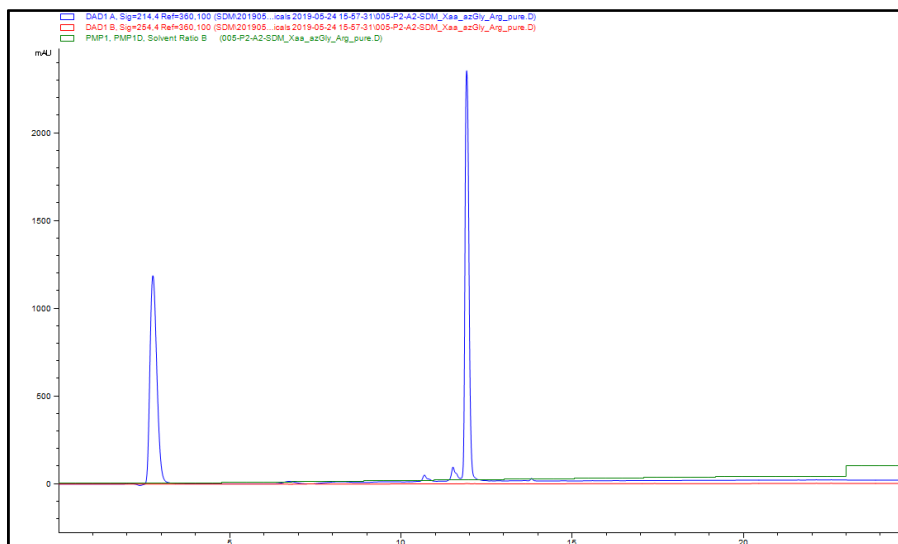

**CMP 6c:** H-(Pro-Hyp-Gly)(Pro-Hyp-azGly)(Pro-Hyp-Gly)<sub>2</sub>(Arg-Hyp-Gly)(Pro-Hyp-Gly)(Pro-Hyp-azGly)(Pro-Hyp-Gly)-NH<sub>2</sub>

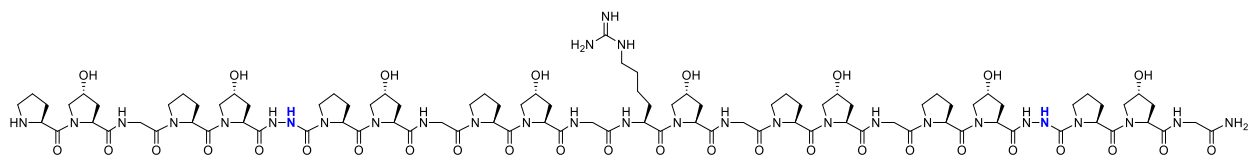

#### MALDI-TOF MS:

Calculated [M+Na]<sup>+</sup>: 2239.034

Found: 2238.804

#### THERMAL DENATURATION CURVE:

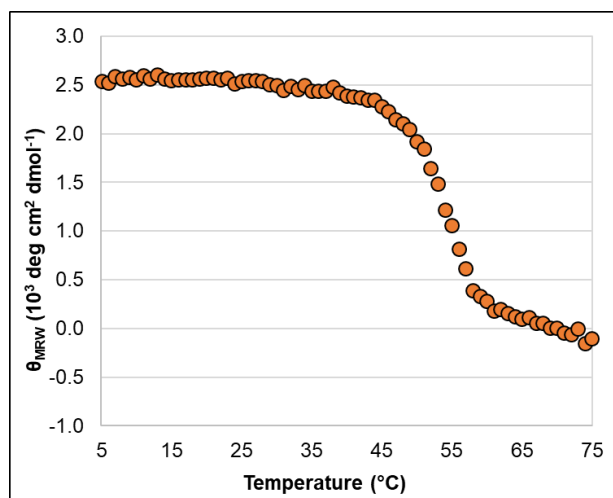

**HPLC:** 1-25% CH<sub>3</sub>CN in 0.1% TFA H<sub>2</sub>O over 30 min at 60 °C

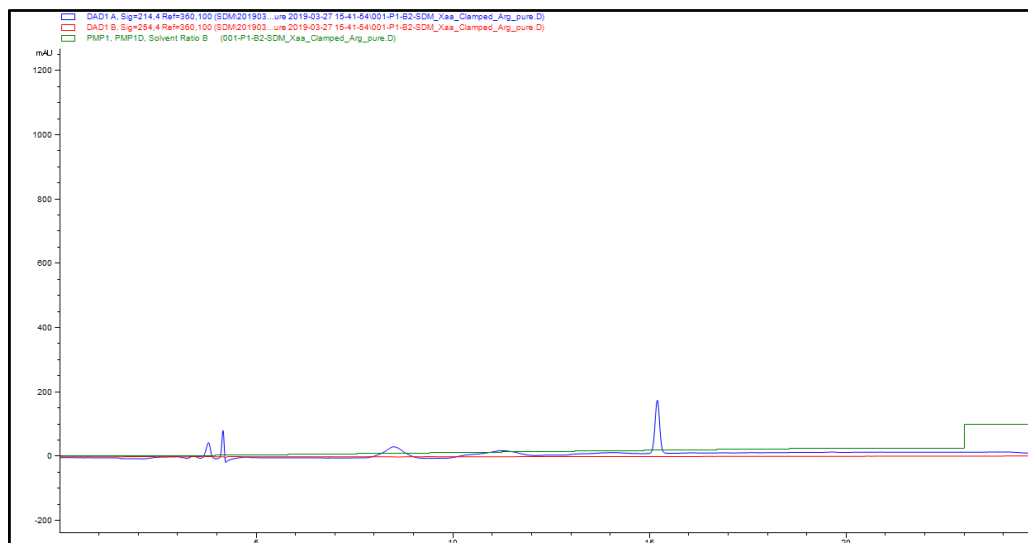

**CMP 7a:** H-(Pro-Hyp-Gly)<sub>3</sub>(Pro-Hyp-Gly)(**Ser**-Hyp-Gly)(Pro-Hyp-Gly)<sub>3</sub>-NH<sub>2</sub>

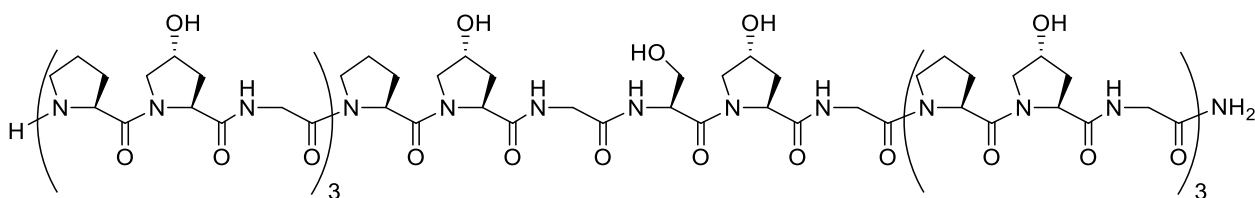

#### MALDI-TOF MS:

Calculated [M+Na]<sup>+</sup>: 2167.974

Found: 2167.596

#### THERMAL DENATURATION CURVE:

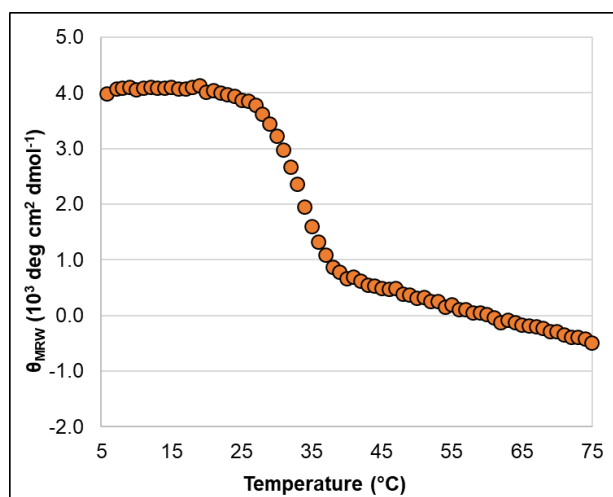

**HPLC:** 10-25% CH<sub>3</sub>CN in 0.1% TFA H<sub>2</sub>O over 30 min at 60 °C

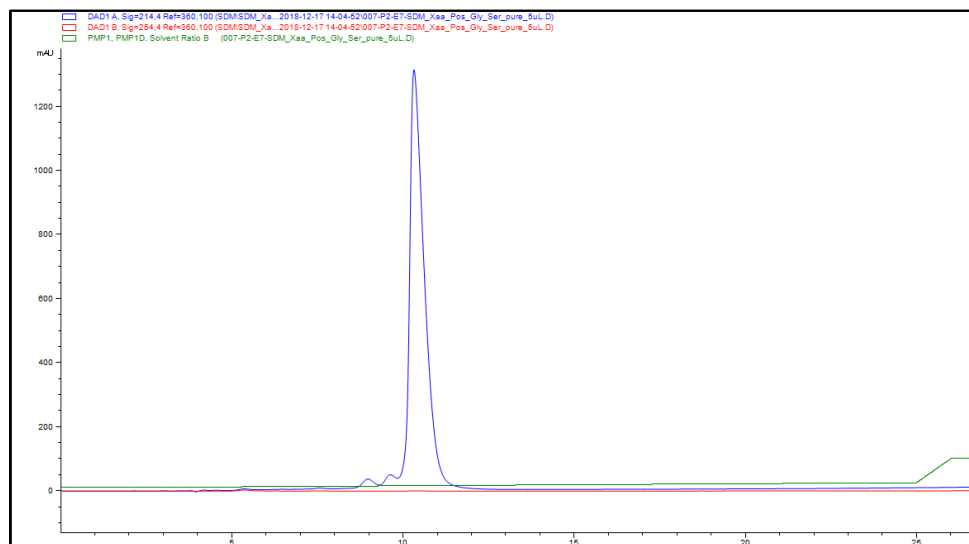

CMP **7b**: H-(Pro-Hyp-Gly)<sub>3</sub>(Pro-Hyp-azGly)(Ser-Hyp-Gly)(Pro-Hyp-Gly)<sub>3</sub>-NH<sub>2</sub>

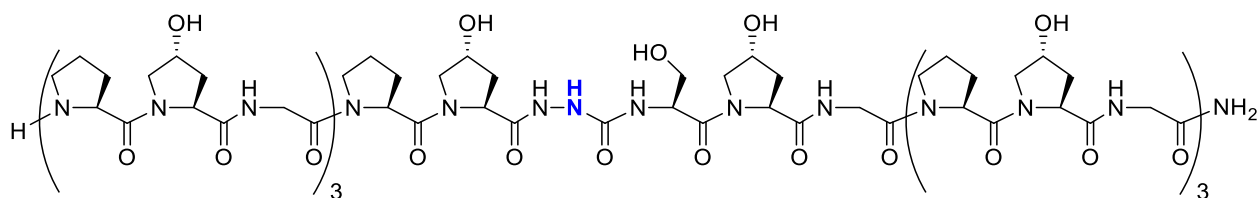

#### MALDI-TOF MS:

Calculated [M+Na]<sup>+</sup>: 2168.969

Found: 2168.836

#### THERMAL DENATURATION CURVE:

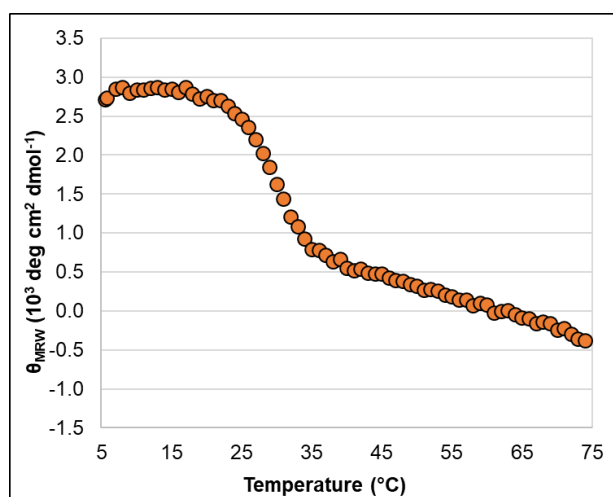

HPLC: 10-25% CH<sub>3</sub>CN in 0.1% TFA H<sub>2</sub>O over 30 min at 60 °C

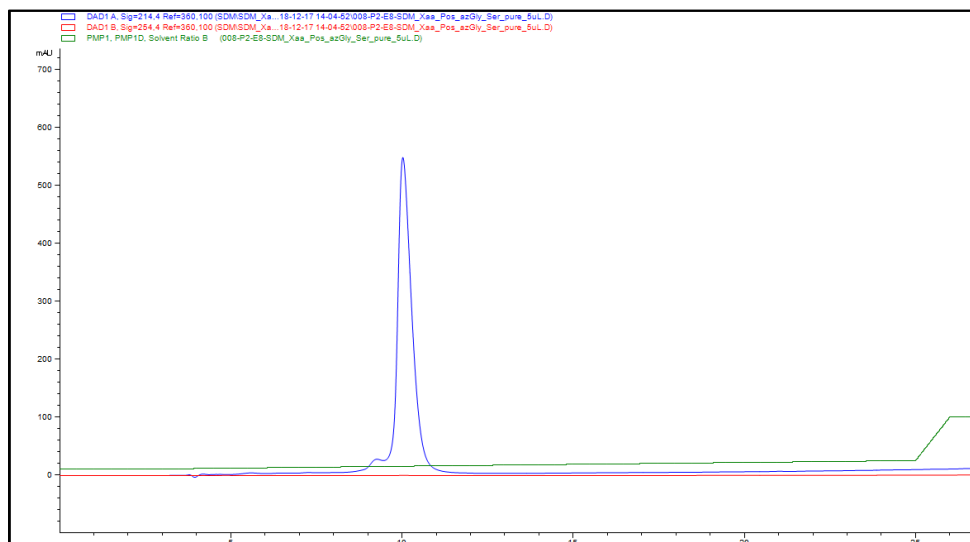

CMP **8a**: H-(Pro-Hyp-Gly)<sub>3</sub>(Pro-Hyp-Gly)(**Thr**-Hyp-Gly)(Pro-Hyp-Gly)<sub>3</sub>-NH<sub>2</sub>

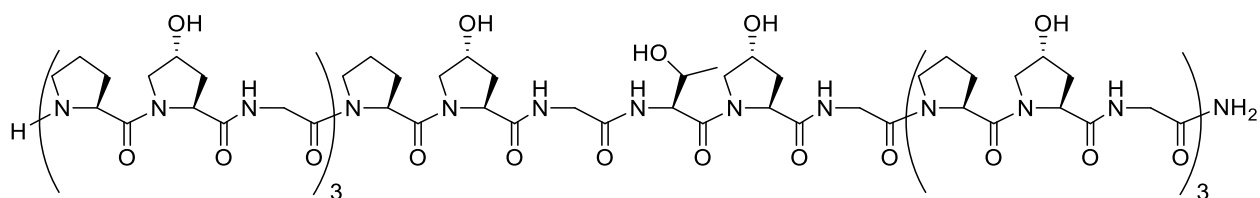

#### MALDI-TOF MS:

Calculated [M+Na]<sup>+</sup>: 2181.990

Found: 2182.513

#### THERMAL DENATURATION CURVE:

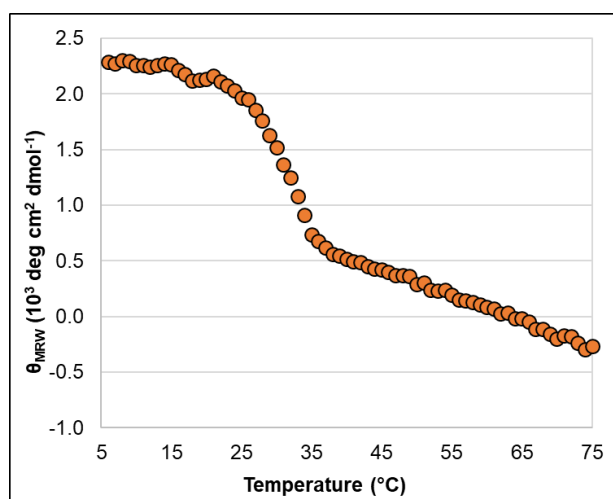

HPLC: 10-30% CH<sub>3</sub>CN in 0.1% TFA H<sub>2</sub>O over 30 min at 60 °C

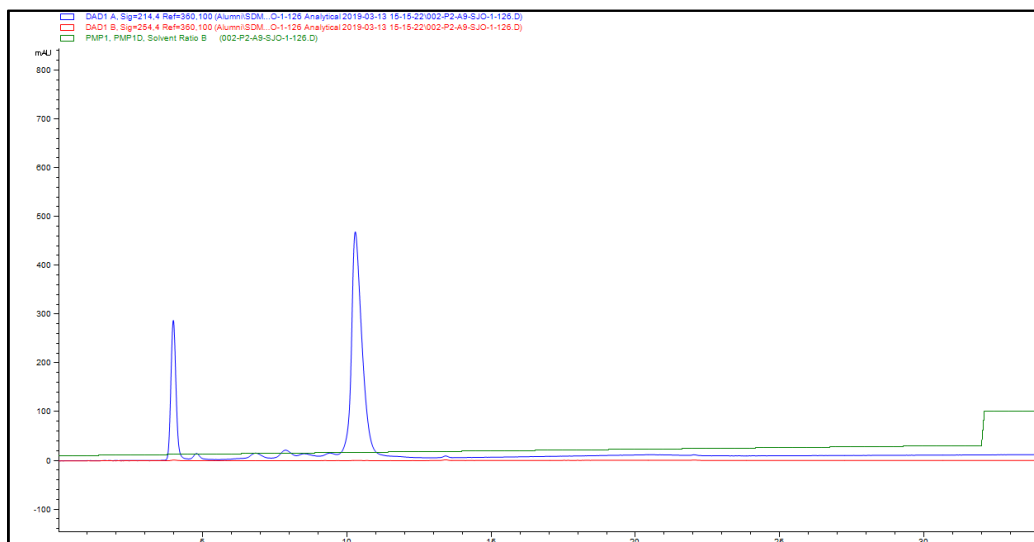

CMP **8b**: H-(Pro-Hyp-Gly)<sub>3</sub>(Pro-Hyp-azGly)(Thr-Hyp-Gly)(Pro-Hyp-Gly)<sub>3</sub>-NH<sub>2</sub>

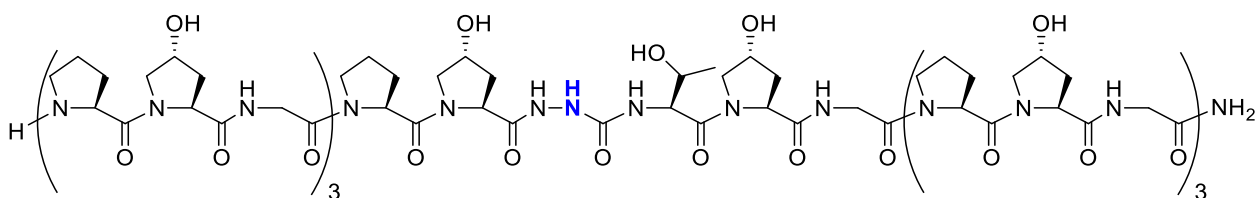

#### MALDI-TOF MS:

Calculated [M+Na]<sup>+</sup>: 2182.985

Found: 2183.459

#### THERMAL DENATURATION CURVE:

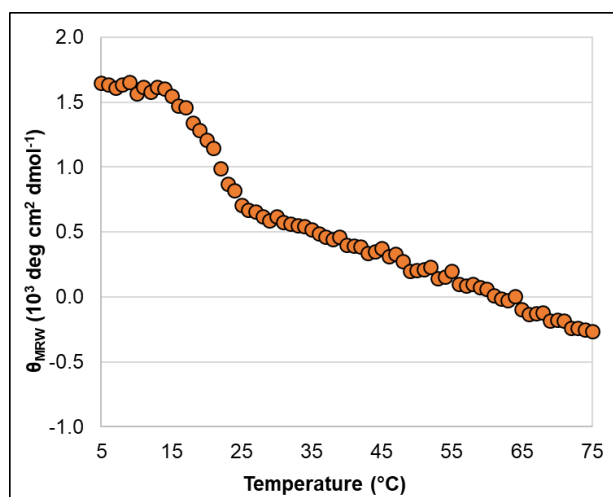

HPLC: 10-30% CH<sub>3</sub>CN in 0.1% TFA H<sub>2</sub>O over 30 min at 60 °C

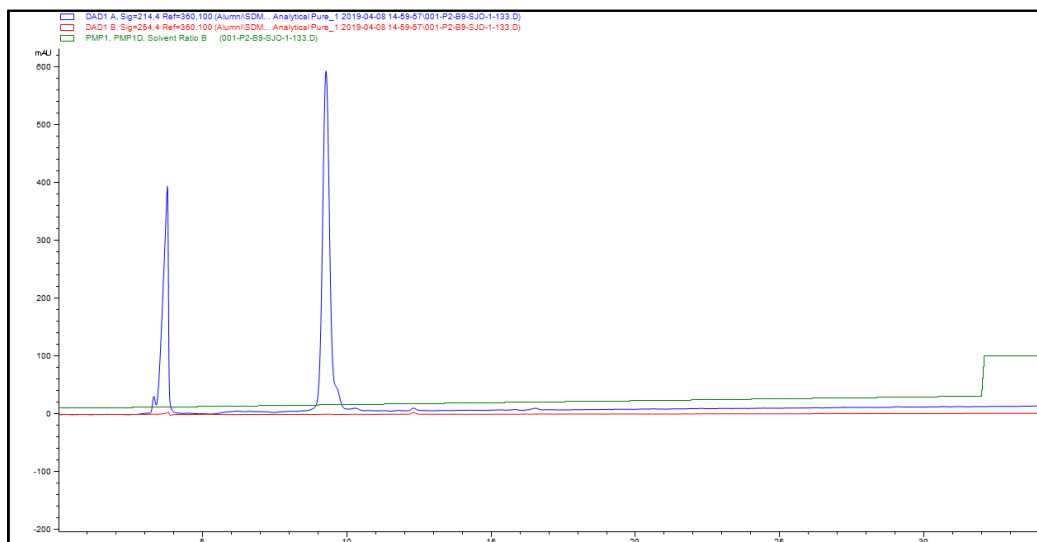

CMP **9a**: H-(Pro-Hyp-Gly)<sub>3</sub>(Pro-Hyp-Gly)(**Cys**-Hyp-Gly)(Pro-Hyp-Gly)<sub>3</sub>-NH<sub>2</sub>

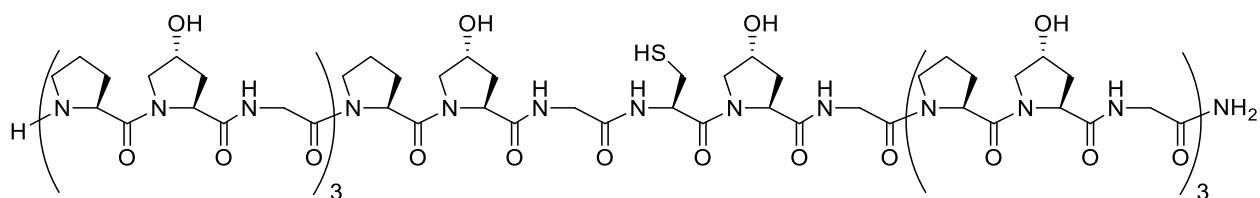

#### MALDI-TOF MS:

Calculated [M+Na]<sup>+</sup>: 2183.952

Found: 2184.240

#### THERMAL DENATURATION CURVE:

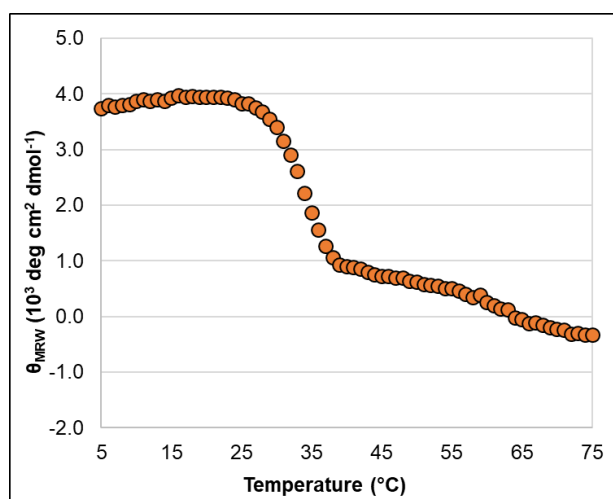

HPLC: 1-25% CH<sub>3</sub>CN in 0.1% TFA H<sub>2</sub>O over 30 min at 60 °C

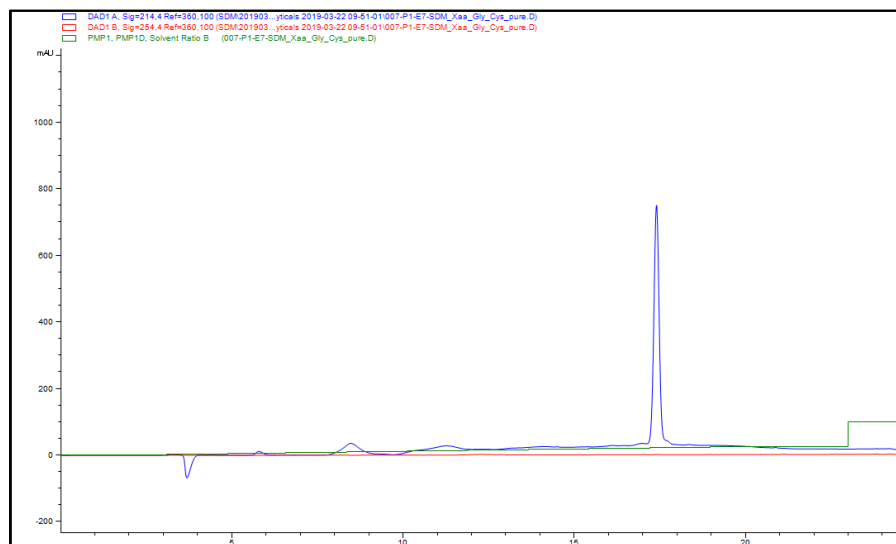

CMP **9b**: H-(Pro-Hyp-Gly)<sub>3</sub>(Pro-Hyp-azGly)(Cys-Hyp-Gly)(Pro-Hyp-Gly)<sub>3</sub>-NH<sub>2</sub>

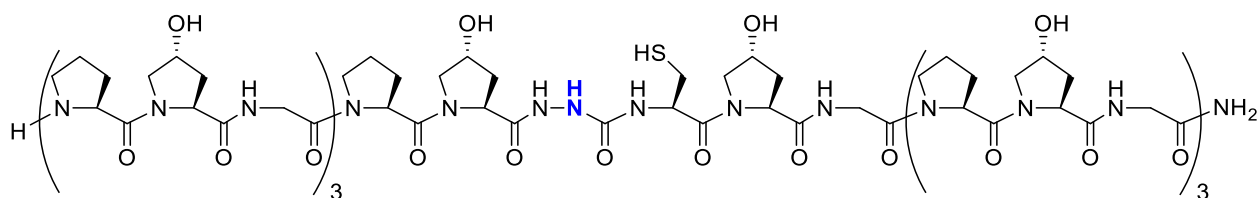

#### MALDI-TOF MS:

Calculated [M+Na]<sup>+</sup>: 2184.947

Found: 2185.361

#### THERMAL DENATURATION CURVE:

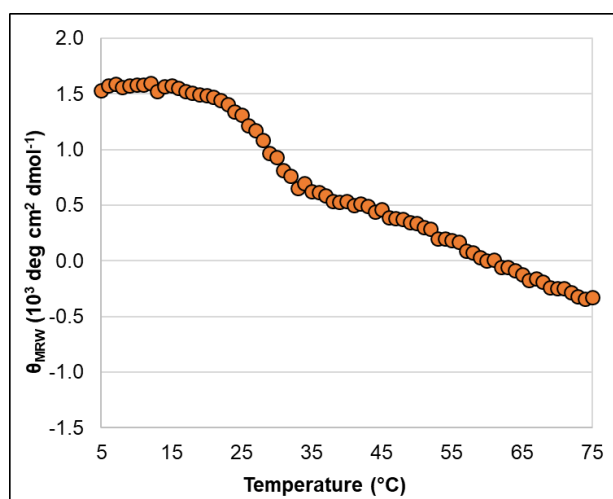

HPLC: 1-25% CH<sub>3</sub>CN in 0.1% TFA H<sub>2</sub>O over 30 min at 60 °C

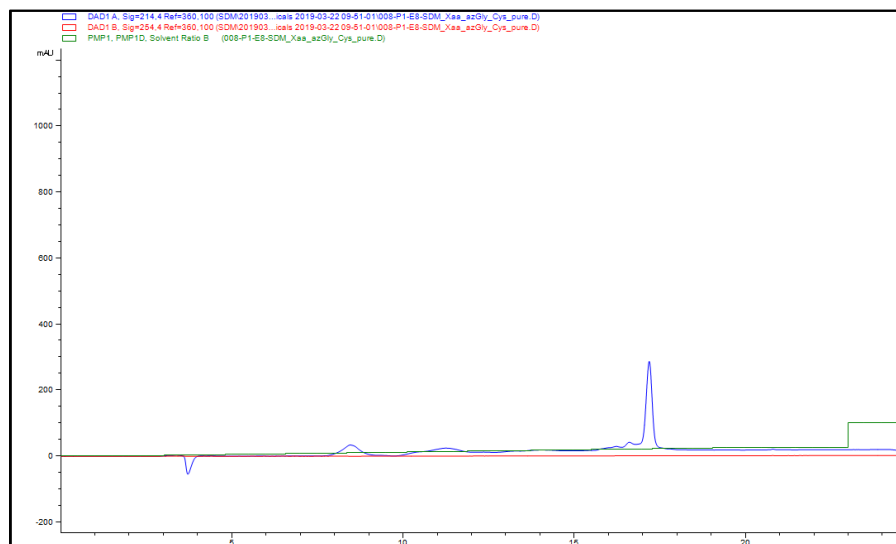

**CMP 10a:** H-(Pro-Hyp-Gly)<sub>3</sub>(Pro-Hyp-Gly)(**Asn**-Hyp-Gly)(Pro-Hyp-Gly)<sub>3</sub>-NH<sub>2</sub>

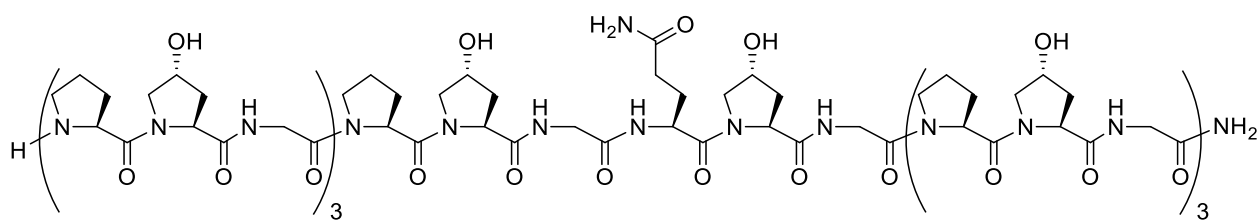

#### MALDI-TOF MS:

Calculated [M+Na]<sup>+</sup>: 2194.985

Found: 2194.714

#### THERMAL DENATURATION CURVE:

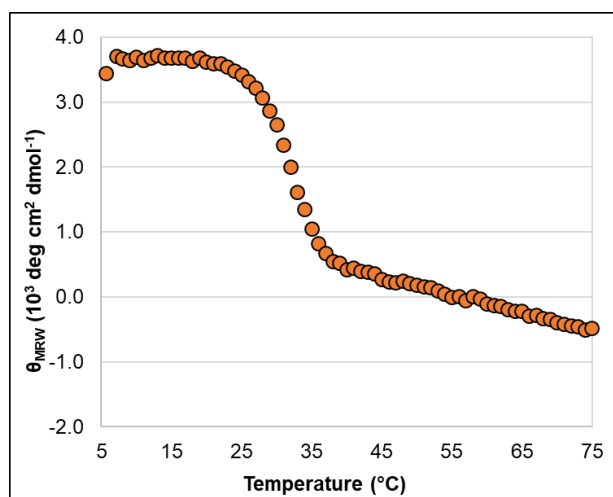

**HPLC:** 10-25% CH<sub>3</sub>CN in 0.1% TFA H<sub>2</sub>O over 30 min at 60 °C

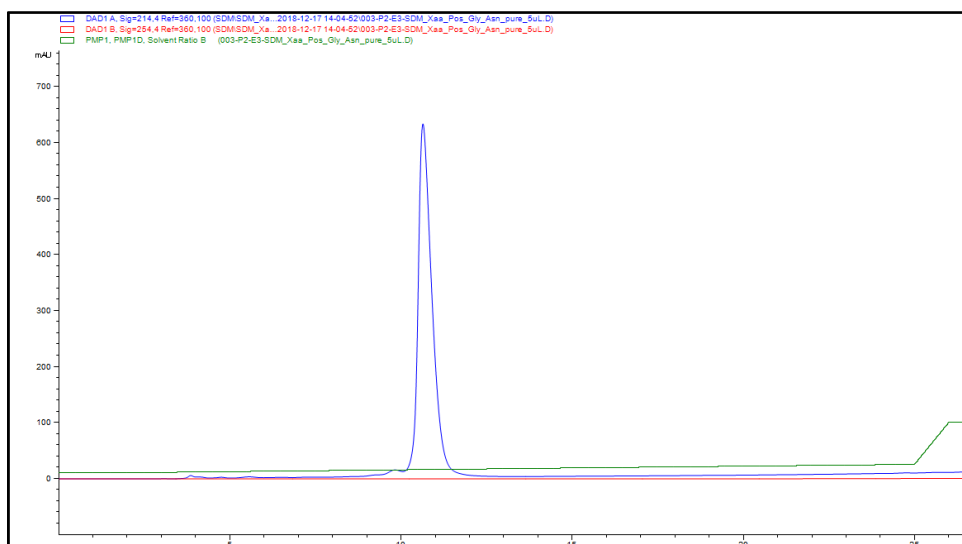

**CMP 10b:** H-(Pro-Hyp-Gly)<sub>3</sub>(Pro-Hyp-azGly)(Asn-Hyp-Gly)(Pro-Hyp-Gly)<sub>3</sub>-NH<sub>2</sub>

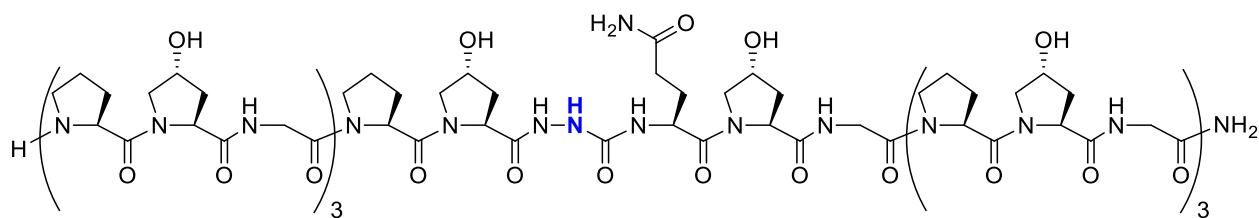

#### MALDI-TOF MS:

Calculated [M+Na]<sup>+</sup>: 2195.980

Found: 2195.772

#### THERMAL DENATURATION CURVE:

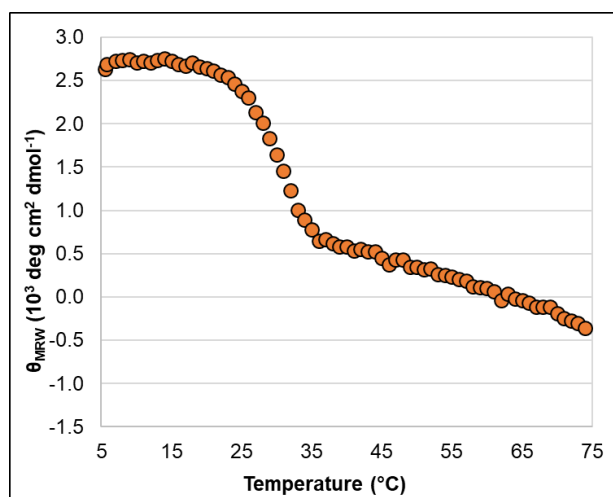

**HPLC:** 10-25% CH<sub>3</sub>CN in 0.1% TFA H<sub>2</sub>O over 30 min at 60 °C

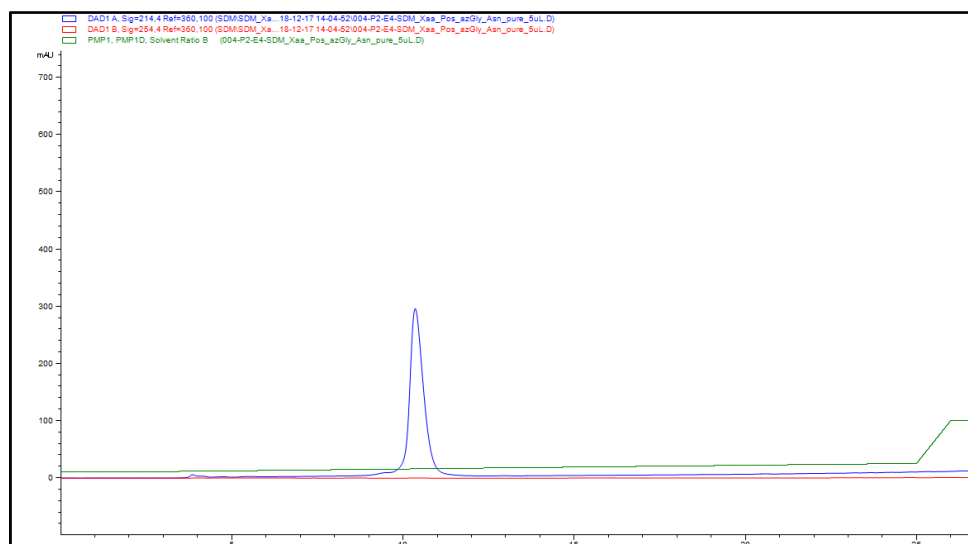

CMP 11a: H-(Pro-Hyp-Gly)<sub>3</sub>(Pro-Hyp-Gly)(**Gln**-Hyp-Gly)(Pro-Hyp-Gly)<sub>3</sub>-NH<sub>2</sub>

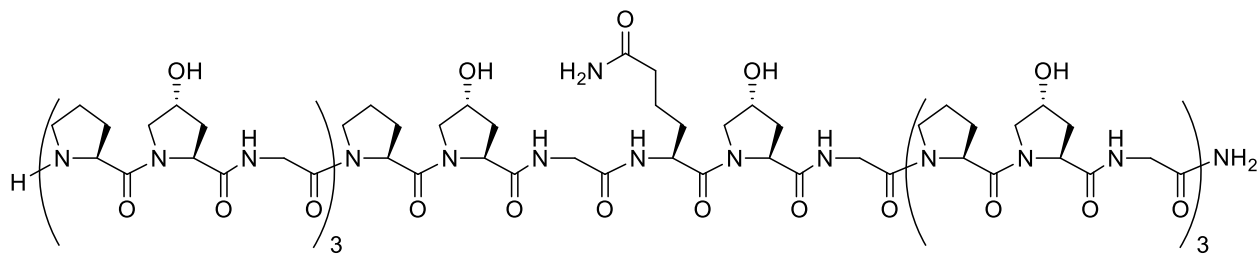

#### MALDI-TOF MS:

Calculated [M+Na]<sup>+</sup>: 2209.001

Found: 2208.731

#### THERMAL DENATURATION CURVE:

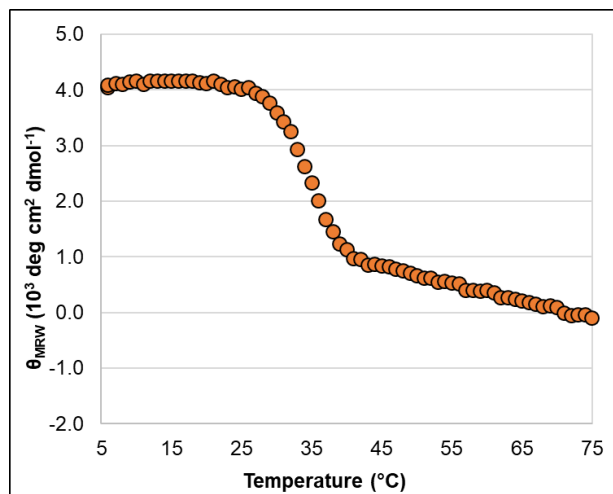

HPLC: 10-25% CH<sub>3</sub>CN in 0.1% TFA H<sub>2</sub>O over 30 min at 60 °C

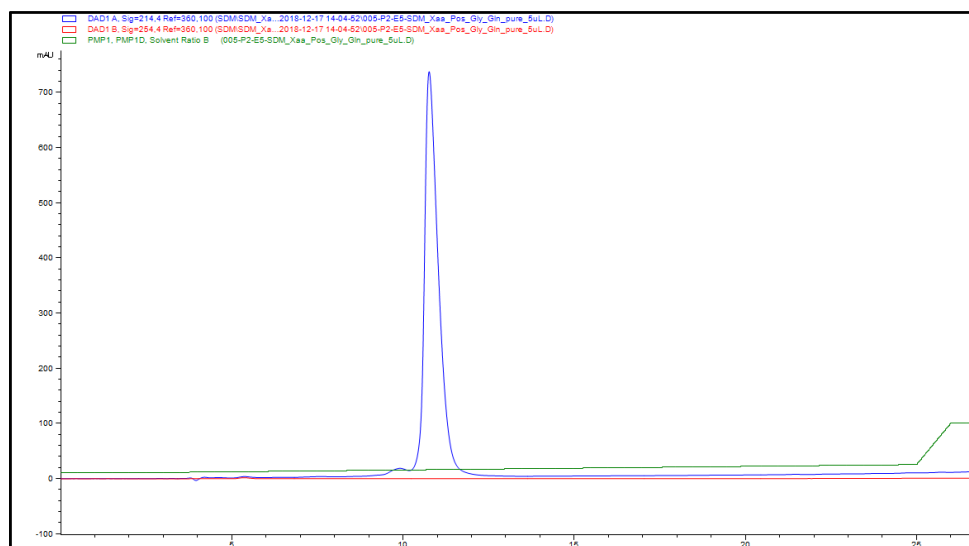

**CMP 11b:** H-(Pro-Hyp-Gly)<sub>3</sub>(Pro-Hyp-azGly)(Gln-Hyp-Gly)(Pro-Hyp-Gly)<sub>3</sub>-NH<sub>2</sub>

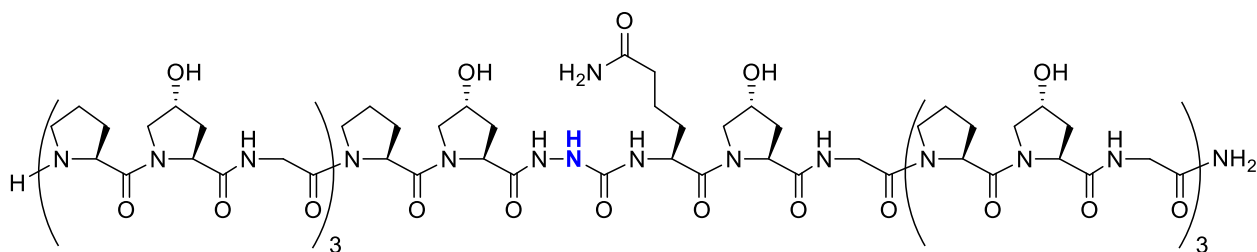

#### MALDI-TOF MS:

Calculated [M+Na]<sup>+</sup>: 2209.996

Found: 2209.719

#### THERMAL DENATURATION CURVE:

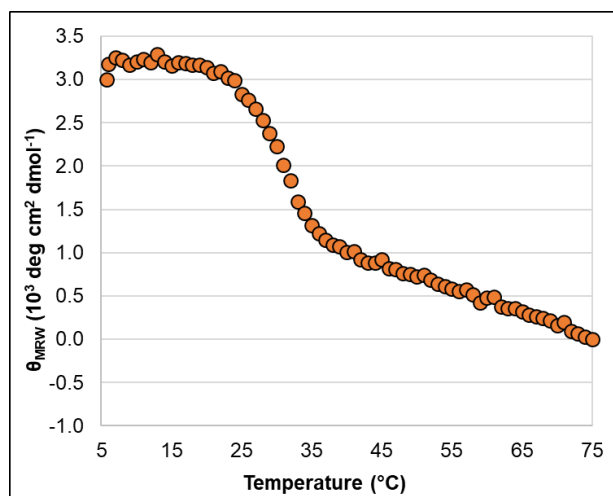

**HPLC:** 10-25% CH<sub>3</sub>CN in 0.1% TFA H<sub>2</sub>O over 30 min at 60 °C

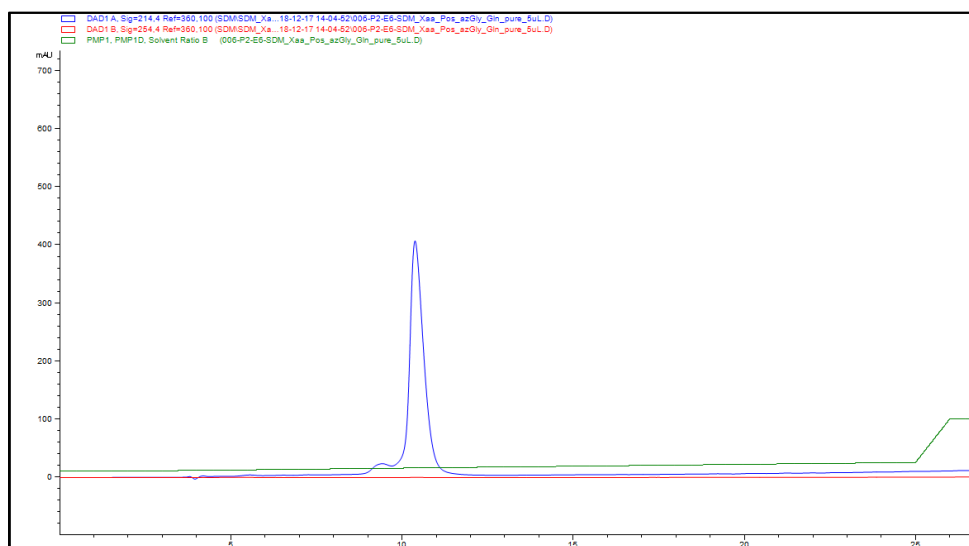

CMP **12a**: H-(Pro-Hyp-Gly)<sub>3</sub>(Pro-Hyp-Gly)(**Gly**-Hyp-Gly)(Pro-Hyp-Gly)<sub>3</sub>-NH<sub>2</sub>

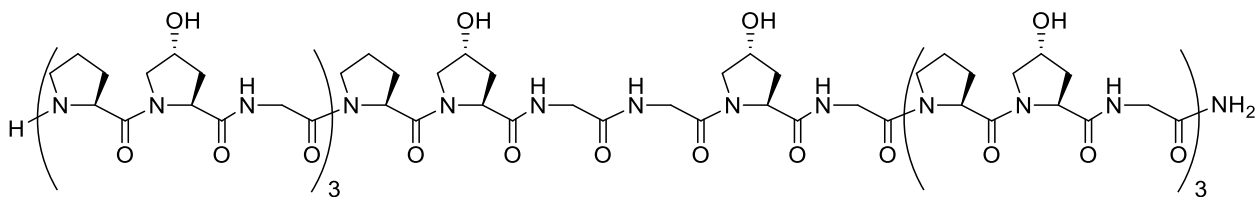

#### MALDI-TOF MS:

Calculated [M+Na]<sup>+</sup>: 2137.956

Found: 2138.001

#### THERMAL DENATURATION CURVE:

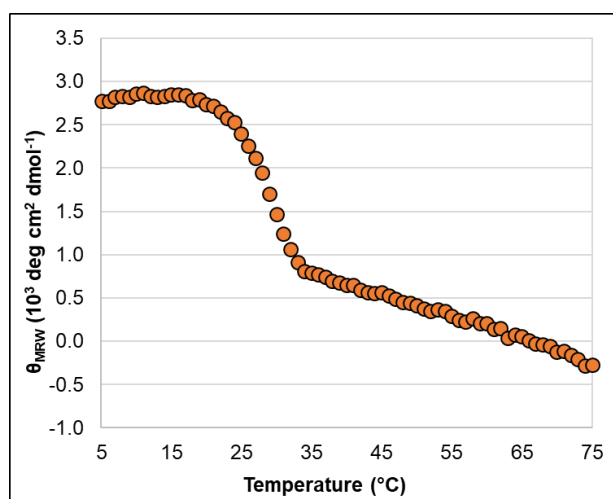

HPLC: 1-25% CH<sub>3</sub>CN in 0.1% TFA H<sub>2</sub>O over 30 min at 60 °C

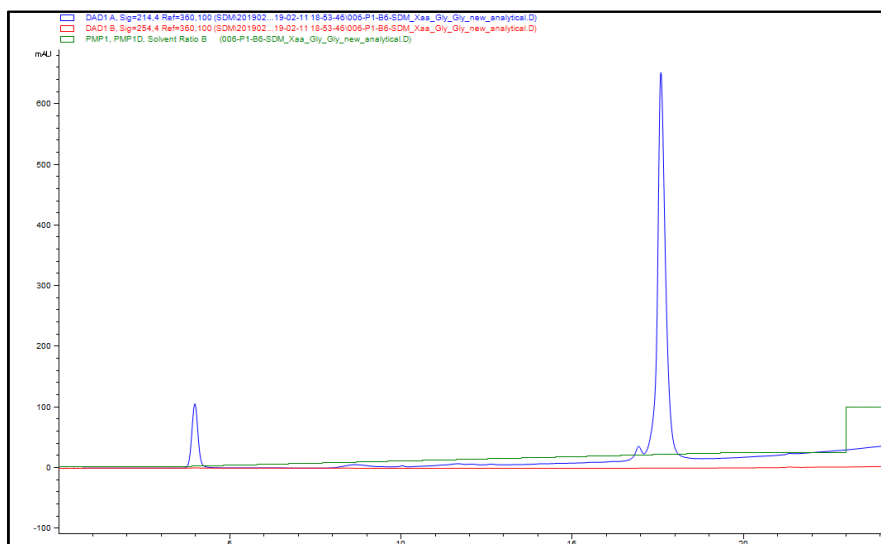

**CMP 12b:** H-(Pro-Hyp-Gly)<sub>3</sub>(Pro-Hyp-azGly)(Gly-Hyp-Gly)(Pro-Hyp-Gly)<sub>3</sub>-NH<sub>2</sub>

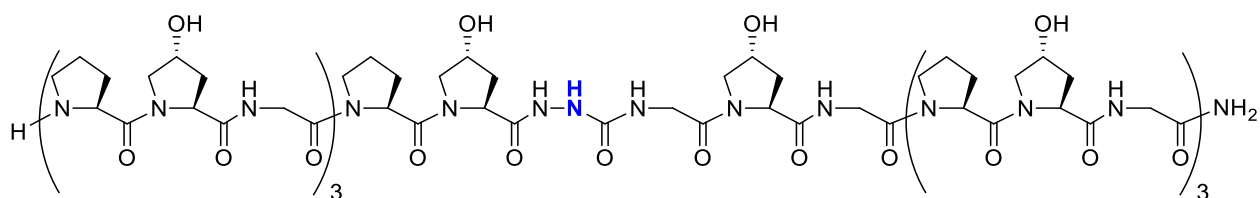

#### MALDI-TOF MS:

Calculated [M+Na]<sup>+</sup>: 2138.951

Found: 2138.978

#### THERMAL DENATURATION CURVE:

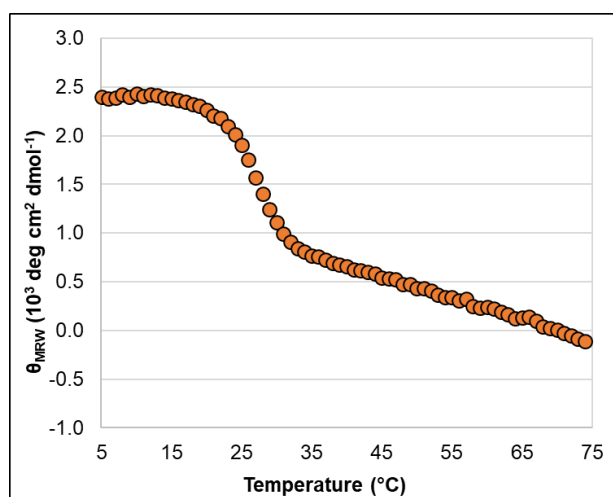

**HPLC:** 1-25% CH<sub>3</sub>CN in 0.1% TFA H<sub>2</sub>O over 30 min at 60 °C

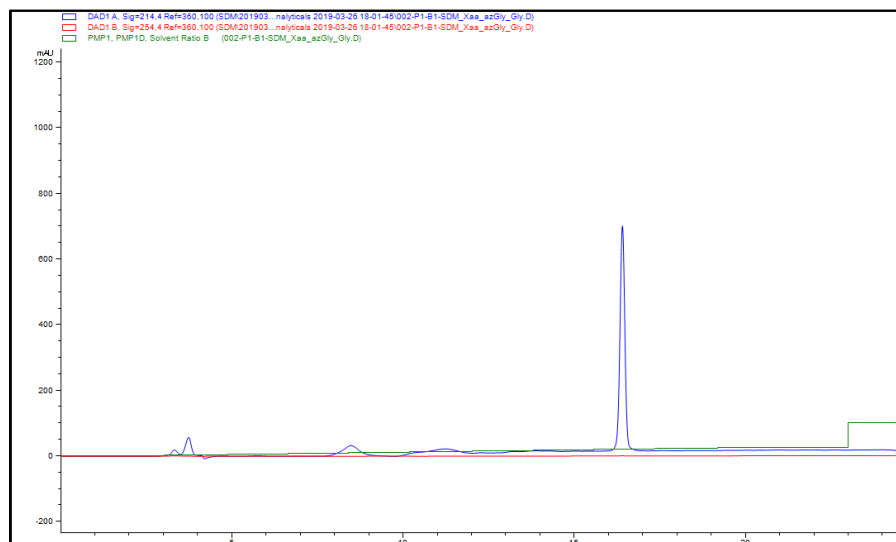

**CMP 13a:** H-(Pro-Hyp-Gly)<sub>3</sub>(Pro-Hyp-Gly)(**Ala**-Hyp-Gly)(Pro-Hyp-Gly)<sub>3</sub>-NH<sub>2</sub>

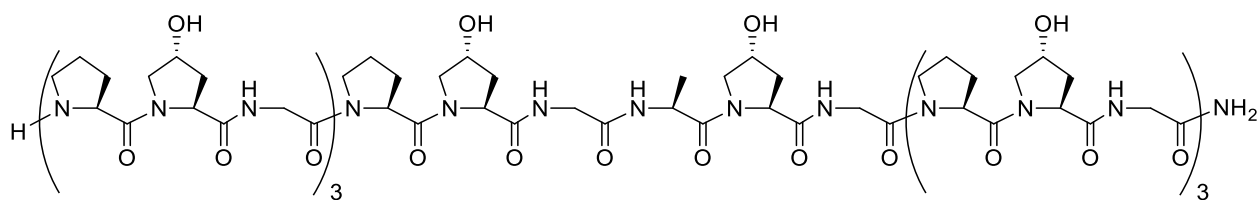

#### MALDI-TOF MS:

Calculated [M+Na]<sup>+</sup>: 2151.980

Found: 2151.915

#### THERMAL DENATURATION CURVE:

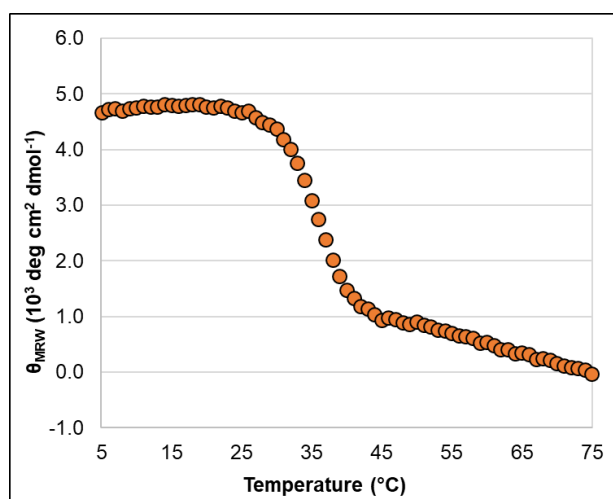

**HPLC:** 1-25% CH<sub>3</sub>CN in 0.1% TFA H<sub>2</sub>O over 30 min at 60 °C

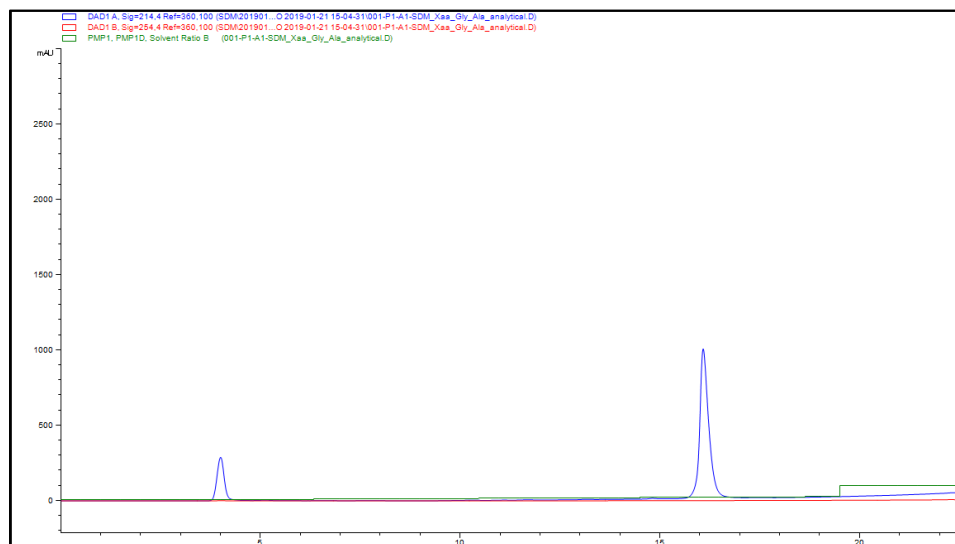

**CMP 13b:** H-(Pro-Hyp-Gly)<sub>3</sub>(Pro-Hyp-azGly)(Ala-Hyp-Gly)(Pro-Hyp-Gly)<sub>3</sub>-NH<sub>2</sub>

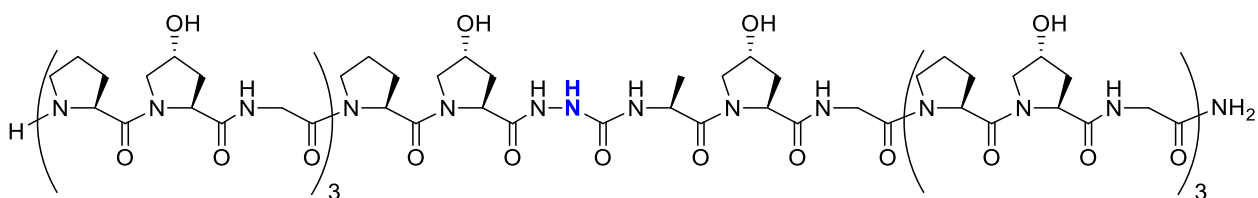

#### MALDI-TOF MS:

Calculated [M+Na]<sup>+</sup>: 2152.975

Found: 2153.061

#### THERMAL DENATURATION CURVE:

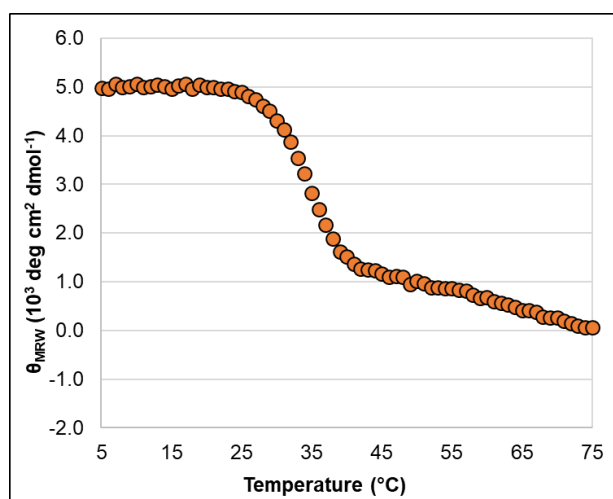

**HPLC:** 1-25% CH<sub>3</sub>CN in 0.1% TFA H<sub>2</sub>O over 30 min at 60 °C

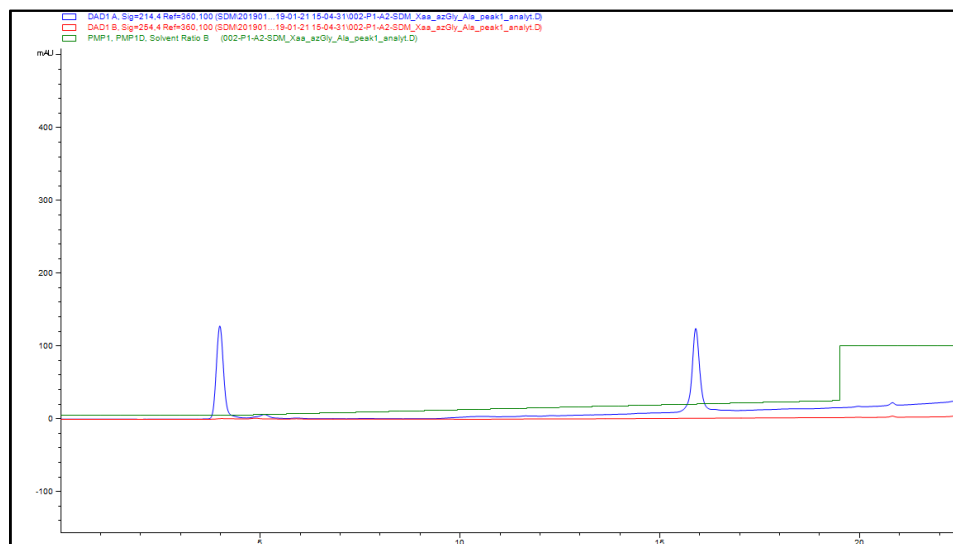

**CMP 14a:** H-(Pro-Hyp-Gly)<sub>3</sub>(Pro-Hyp-Gly)(**Val**-Hyp-Gly)(Pro-Hyp-Gly)<sub>3</sub>-NH<sub>2</sub>

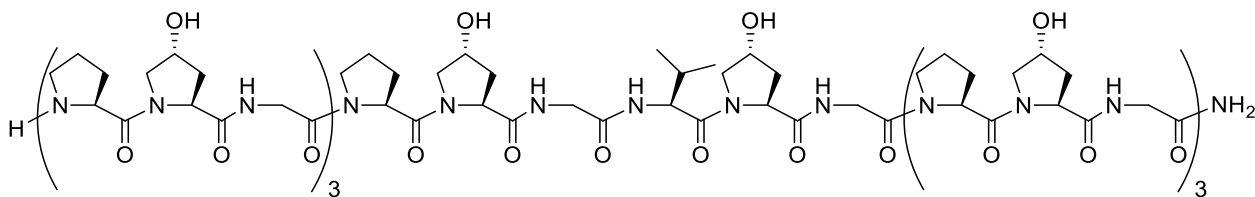

#### MALDI-TOF MS:

Calculated [M+Na]<sup>+</sup>: 2180.011

Found: 2179.871

#### THERMAL DENATURATION CURVE:

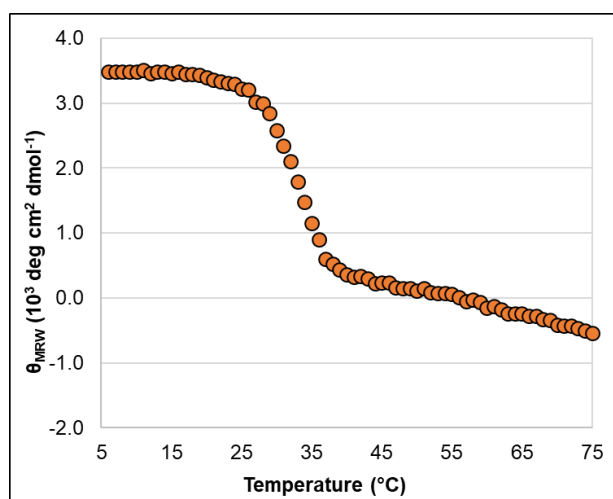

**HPLC:** 1-25% CH<sub>3</sub>CN in 0.1% TFA H<sub>2</sub>O over 30 min at 60 °C

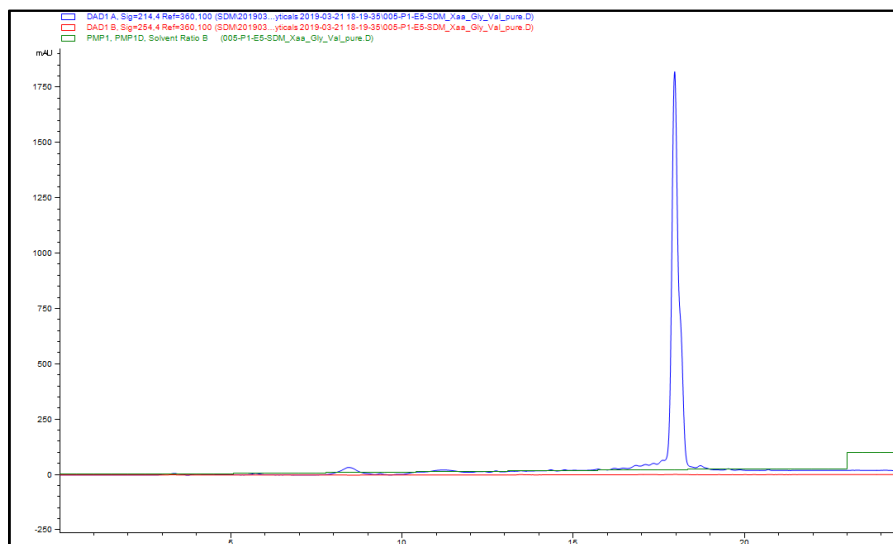

**CMP 14b:** H-(Pro-Hyp-Gly)<sub>3</sub>(Pro-Hyp-azGly)(Val-Hyp-Gly)(Pro-Hyp-Gly)<sub>3</sub>-NH<sub>2</sub>

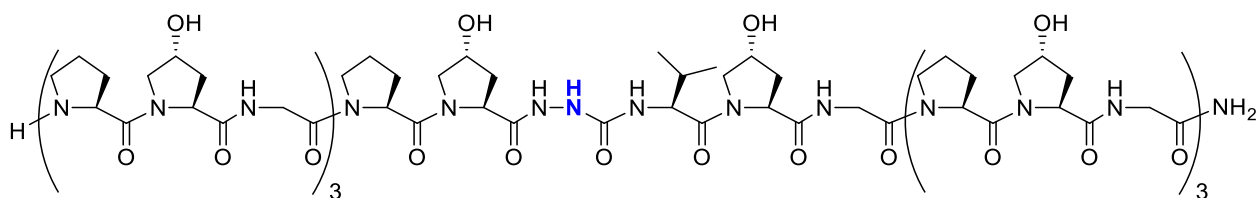

#### MALDI-TOF MS:

Calculated [M+Na]<sup>+</sup>: 2181.006

Found: 2180.956

#### THERMAL DENATURATION CURVE:

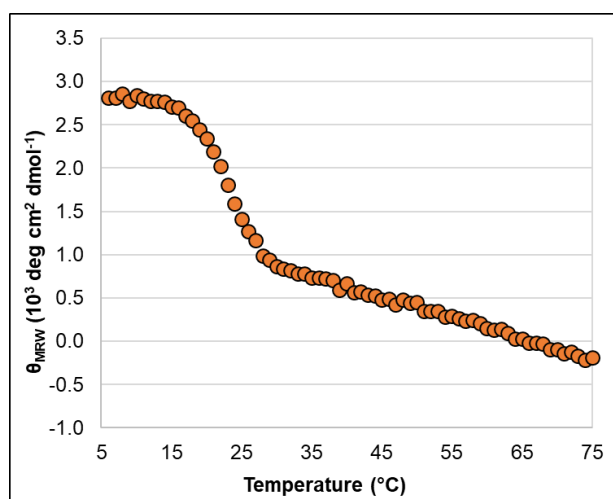

**HPLC:** 1-25% CH<sub>3</sub>CN in 0.1% TFA H<sub>2</sub>O over 30 min at 60 °C

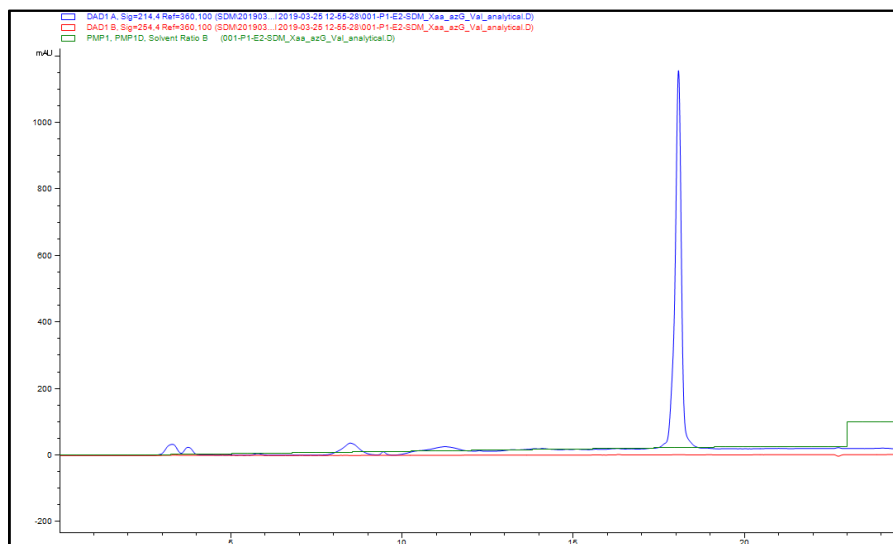

**CMP 14c:** H-(Pro-Hyp-Gly)(Pro-Hyp-azGly)(Pro-Hyp-Gly)<sub>2</sub>(Val-Hyp-Gly)(Pro-Hyp-Gly)(Pro-Hyp-azGly)(Pro-Hyp-Gly)-NH<sub>2</sub>

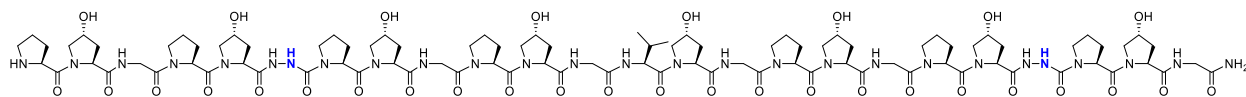

#### MALDI-TOF MS:

Calculated [M+Na]<sup>+</sup>: 2182.001

Found: 2181.542

#### THERMAL DENATURATION CURVE:

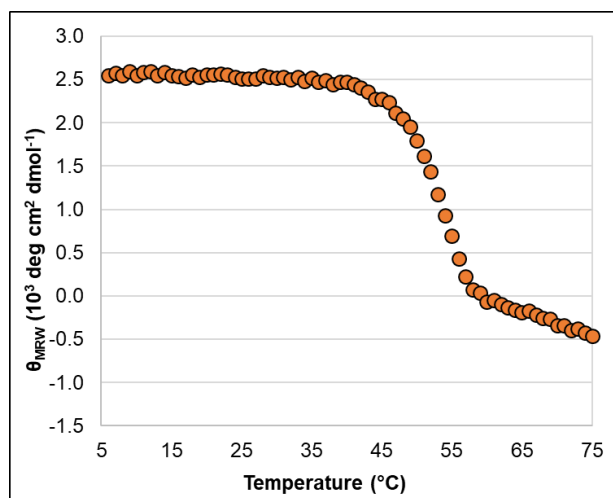

**HPLC:** 1-25% CH<sub>3</sub>CN in 0.1% TFA H<sub>2</sub>O over 30 min at 60 °C

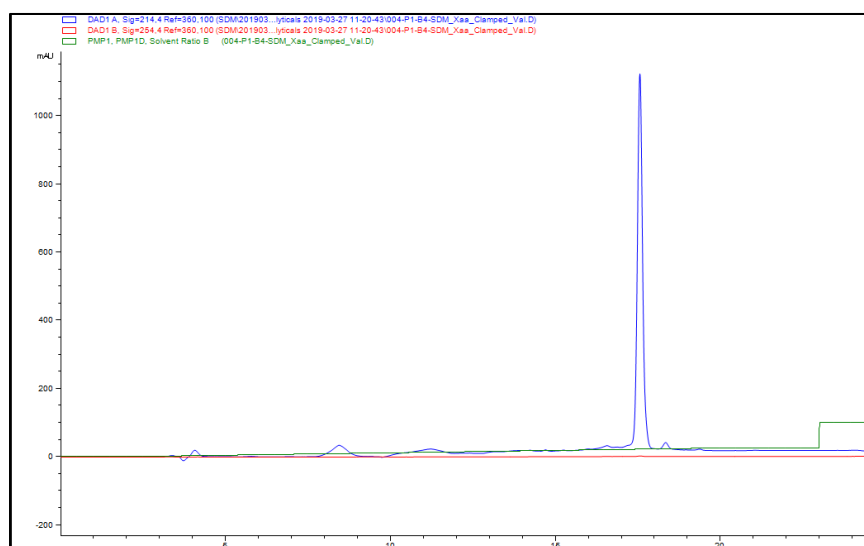

**CMP 15a:** H-(Pro-Hyp-Gly)<sub>3</sub>(Pro-Hyp-Gly)(**Leu**-Hyp-Gly)(Pro-Hyp-Gly)<sub>3</sub>-NH<sub>2</sub>

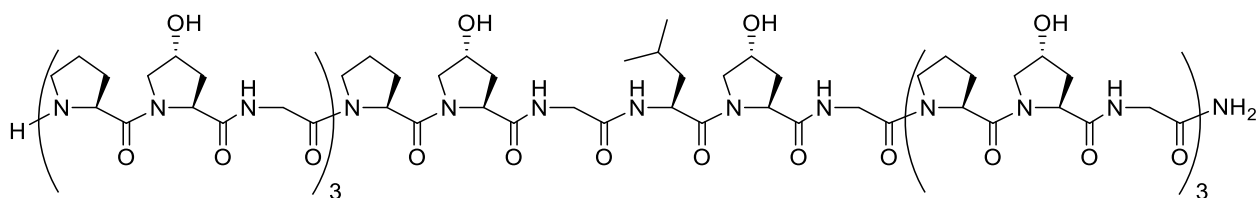

**MALDI-TOF MS:**

Calculated [M+Na]<sup>+</sup>: 2194.026

Found: 2193.711

**THERMAL DENATURATION CURVE:**

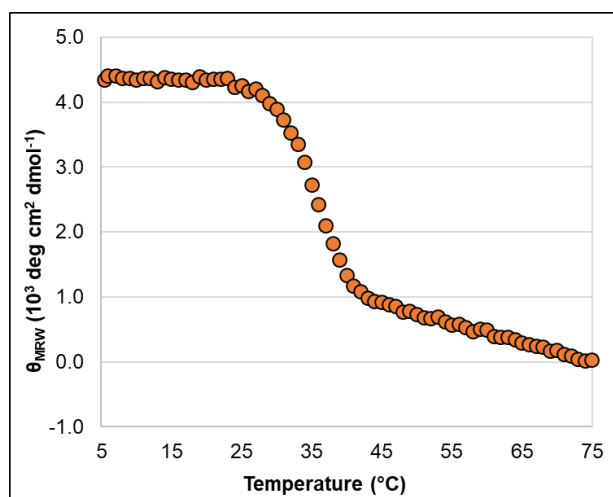

**HPLC:** 10-25% CH<sub>3</sub>CN in 0.1% TFA H<sub>2</sub>O over 30 min at 60 °C

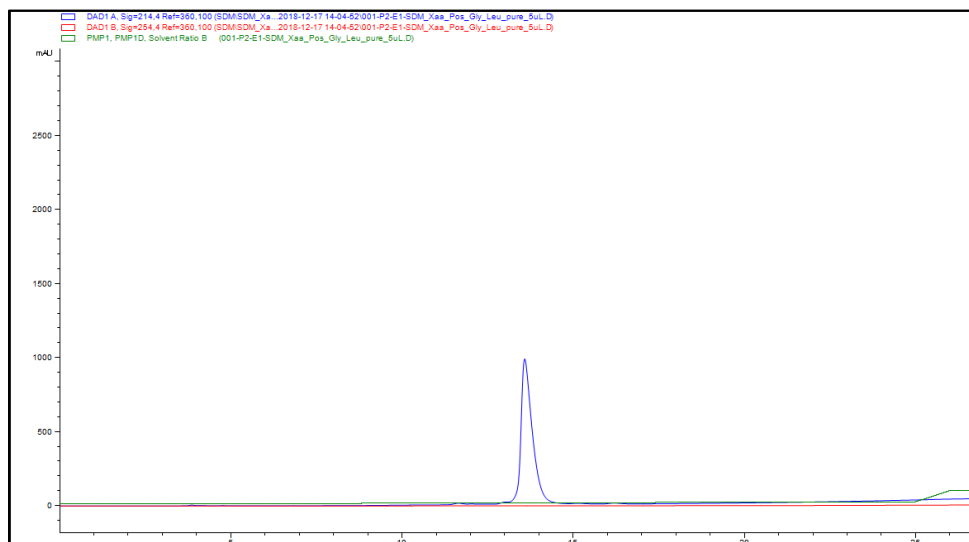

**CMP 15b:** H-(Pro-Hyp-Gly)<sub>3</sub>(Pro-Hyp-azGly)(Leu-Hyp-Gly)(Pro-Hyp-Gly)<sub>3</sub>-NH<sub>2</sub>

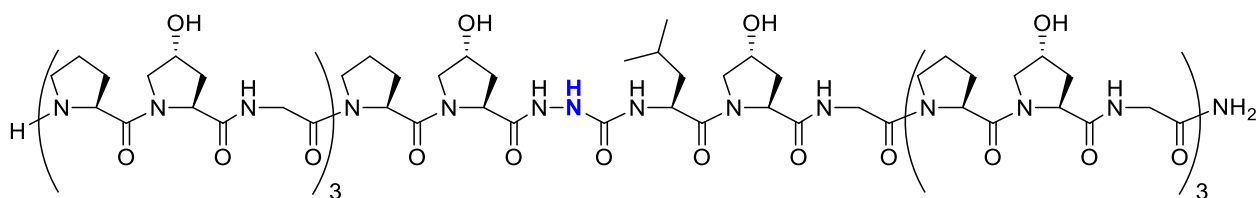

#### MALDI-TOF MS:

Calculated [M+Na]<sup>+</sup>: 2195.021

Found: 2194.882

#### THERMAL DENATURATION CURVE:

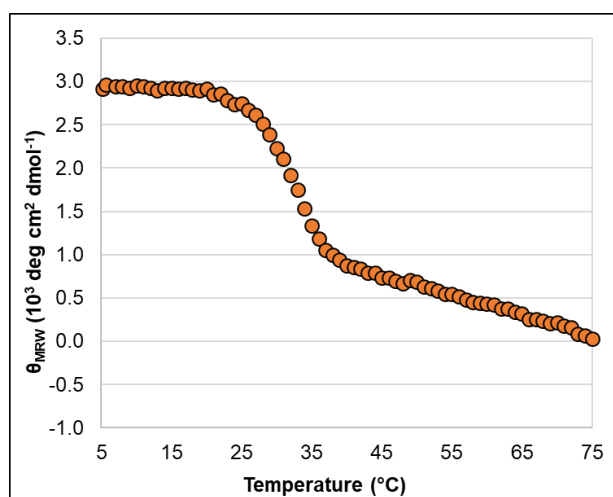

**HPLC:** 10-25% CH<sub>3</sub>CN in 0.1% TFA H<sub>2</sub>O over 30 min at 60 °C

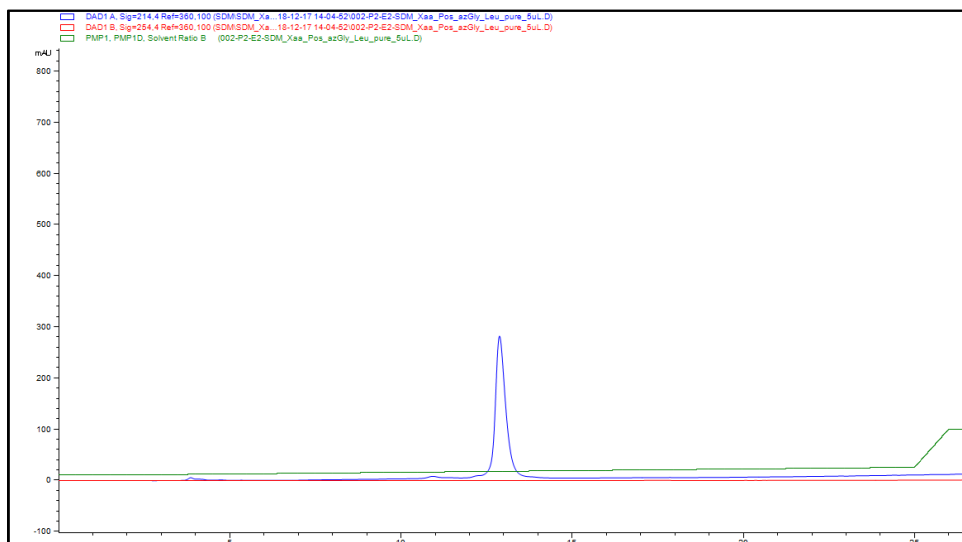

**CMP 16a:** H-(Pro-Hyp-Gly)<sub>3</sub>(Pro-Hyp-Gly)(**Ile**-Hyp-Gly)(Pro-Hyp-Gly)<sub>3</sub>-NH<sub>2</sub>

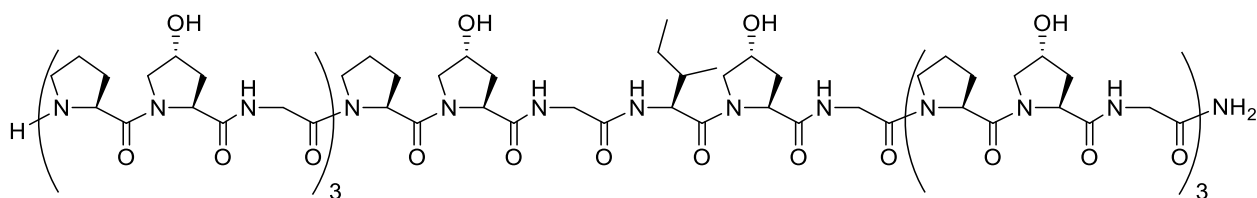

#### MALDI-TOF MS:

Calculated [M+Na]<sup>+</sup>: 2194.026

Found: 2194.076

#### THERMAL DENATURATION CURVE:

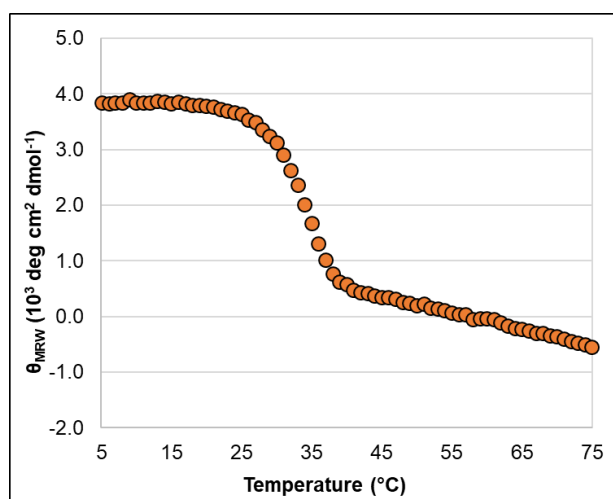

**HPLC:** 1-25% CH<sub>3</sub>CN in 0.1% TFA H<sub>2</sub>O over 30 min at 60 °C

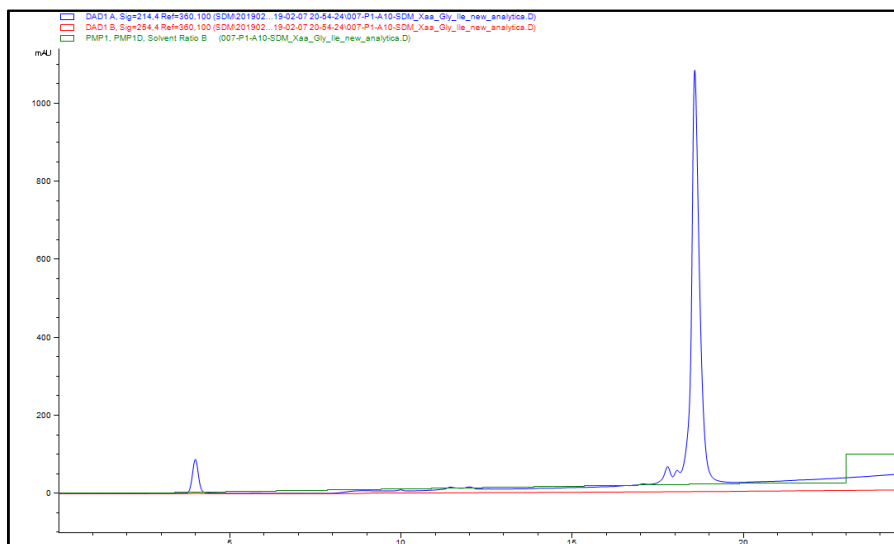

**CMP 16b:** H-(Pro-Hyp-Gly)<sub>3</sub>(Pro-Hyp-azGly)(Ile-Hyp-Gly)(Pro-Hyp-Gly)<sub>3</sub>-NH<sub>2</sub>

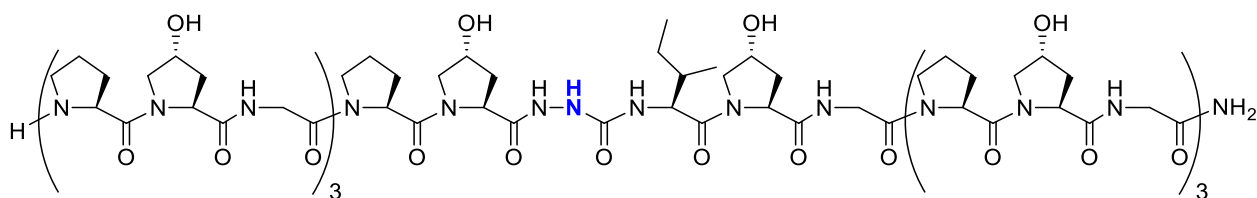

#### MALDI-TOF MS:

Calculated [M+Na]<sup>+</sup>: 2195.021

Found: 2195.029

#### THERMAL DENATURATION CURVE:

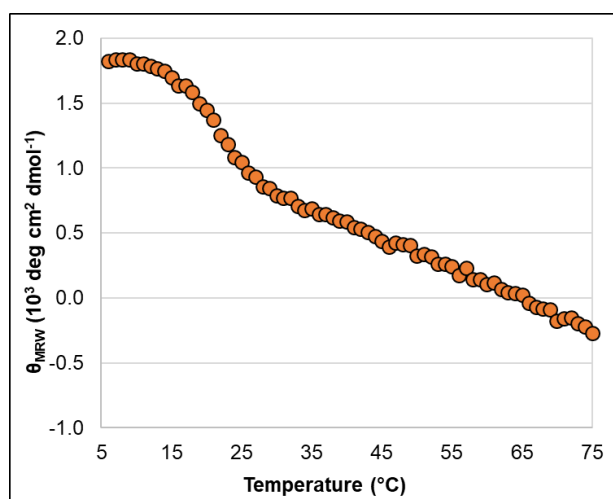

**HPLC:** 1-25% CH<sub>3</sub>CN in 0.1% TFA H<sub>2</sub>O over 30 min at 60 °C

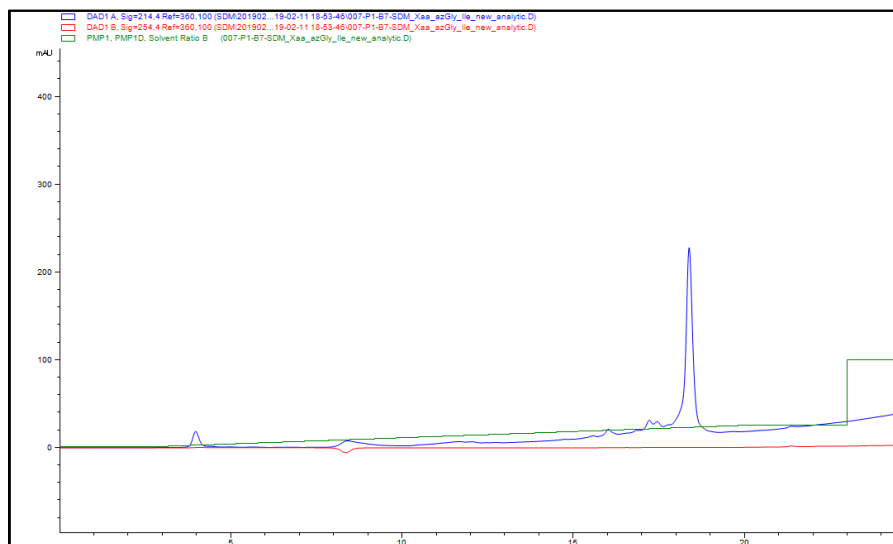

**CMP 17a:** H-(Pro-Hyp-Gly)<sub>3</sub>(Pro-Hyp-Gly)(**Met**-Hyp-Gly)(Pro-Hyp-Gly)<sub>3</sub>-NH<sub>2</sub>

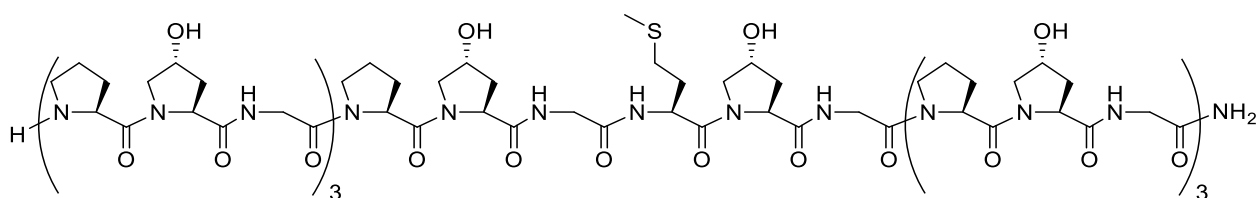

#### MALDI-TOF MS:

Calculated [M+Na]<sup>+</sup>: 2211.983

Found: 2212.440

#### THERMAL DENATURATION CURVE:

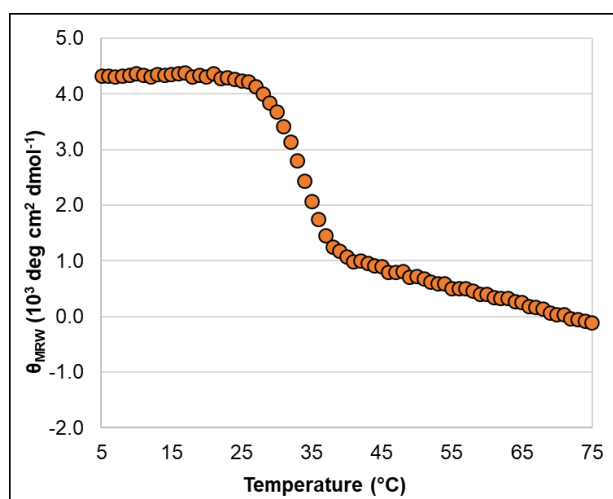

**HPLC:** 1-25% CH<sub>3</sub>CN in 0.1% TFA H<sub>2</sub>O over 30 min at 60 °C

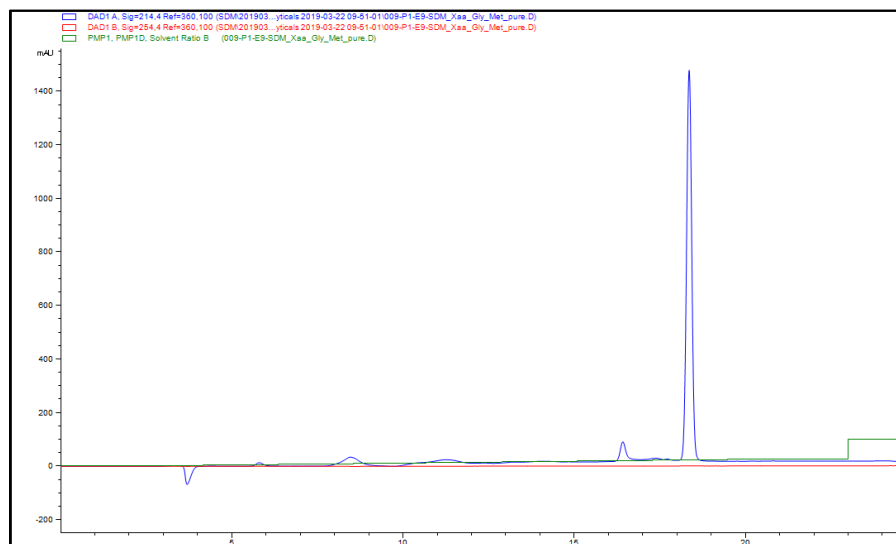

**CMP 17b:** H-(Pro-Hyp-Gly)<sub>3</sub>(Pro-Hyp-azGly)(Met-Hyp-Gly)(Pro-Hyp-Gly)<sub>3</sub>-NH<sub>2</sub>

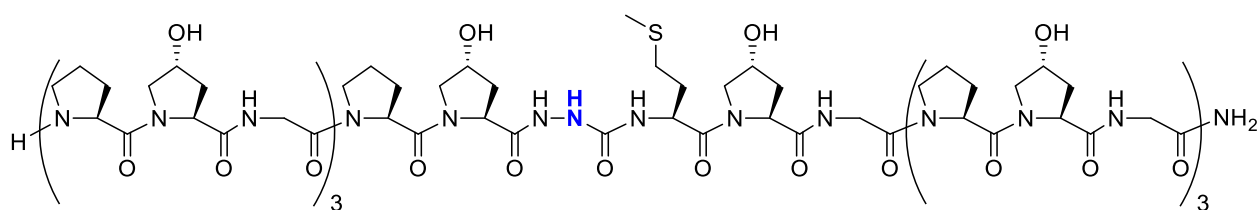

#### MALDI-TOF MS:

Calculated [M+Na]<sup>+</sup>: 2212.978

Found: 2213.541

#### THERMAL DENATURATION CURVE:

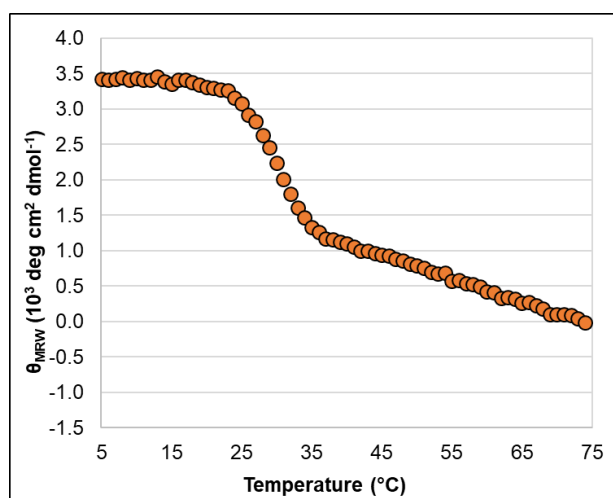

**HPLC:** 1-25% CH<sub>3</sub>CN in 0.1% TFA H<sub>2</sub>O over 30 min at 60 °C

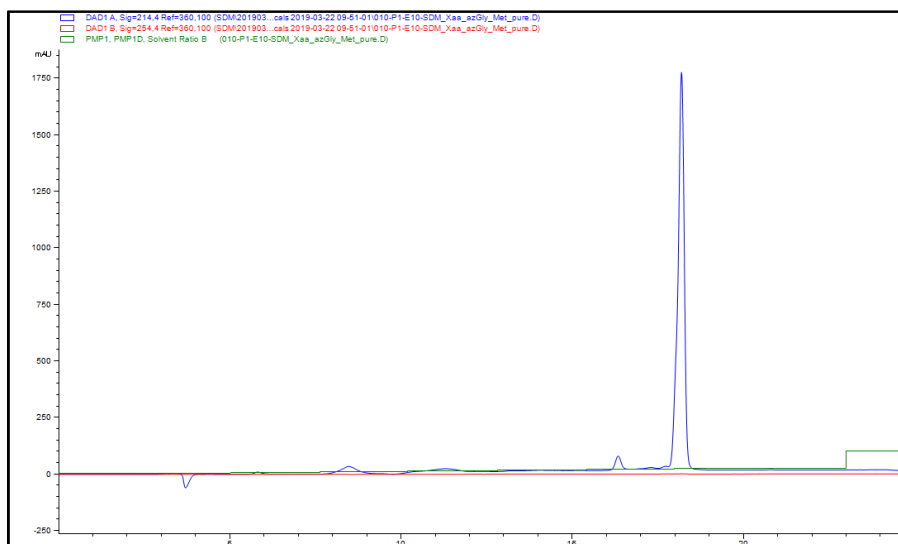

CMP **18a**: H-(Pro-Hyp-Gly)<sub>3</sub>(Pro-Hyp-Gly)(**Phe**-Hyp-Gly)(Pro-Hyp-Gly)<sub>3</sub>-NH<sub>2</sub>

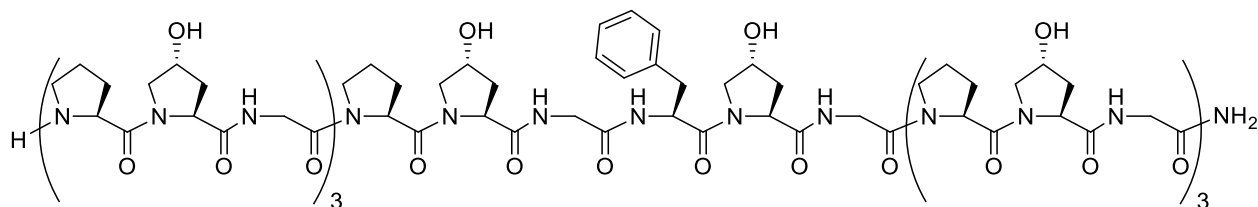

#### MALDI-TOF MS:

Calculated [M+Na]<sup>+</sup>: 2228.011

Found: 2228.519

#### THERMAL DENATURATION CURVE:

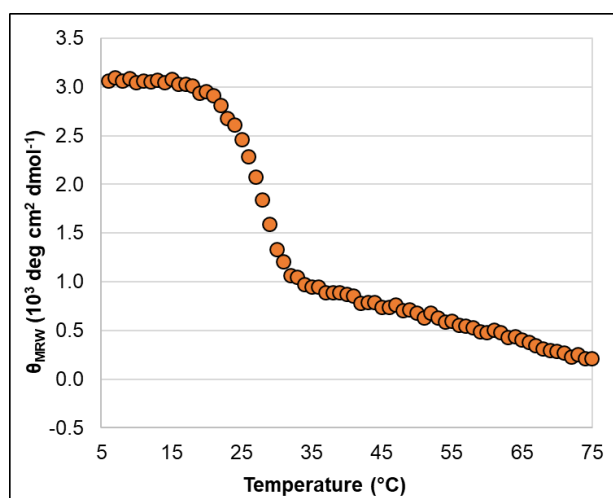

HPLC: 1-40% CH<sub>3</sub>CN in 0.1% TFA H<sub>2</sub>O over 30 min at 60 °C

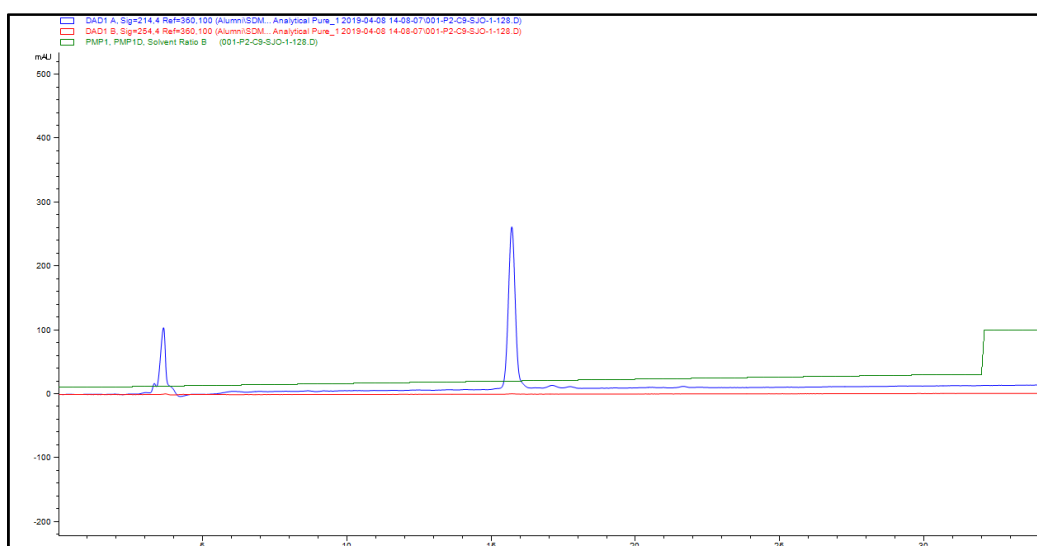

**CMP 18b:** H-(Pro-Hyp-Gly)<sub>3</sub>(Pro-Hyp-azGly)(Phe-Hyp-Gly)(Pro-Hyp-Gly)<sub>3</sub>-NH<sub>2</sub>

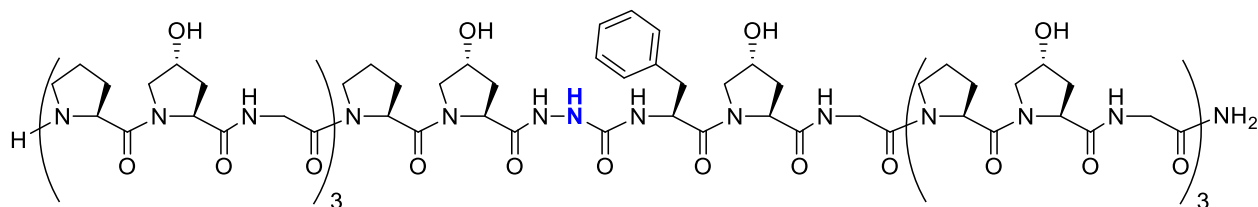

#### MALDI-TOF MS:

Calculated [M+H]<sup>+</sup>: 2206.016

Found: 2206.406

#### THERMAL DENATURATION CURVE:

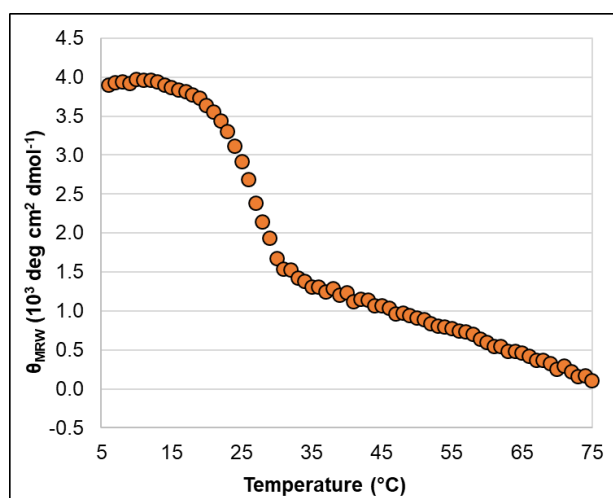

**HPLC:** 1-25% CH<sub>3</sub>CN in 0.1% TFA H<sub>2</sub>O over 30 min at 60 °C

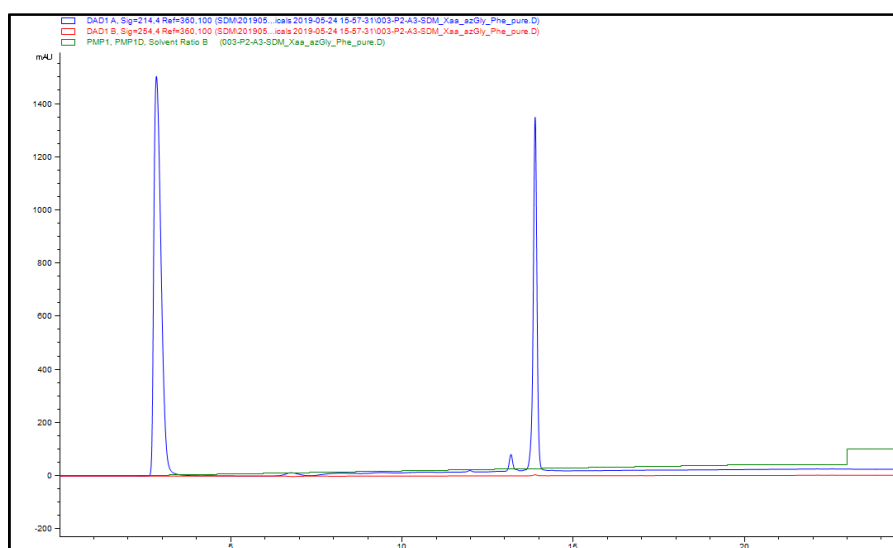

**CMP 19a:** H-(Pro-Hyp-Gly)<sub>3</sub>(Pro-Hyp-Gly)(**Tyr**-Hyp-Gly)(Pro-Hyp-Gly)<sub>3</sub>-NH<sub>2</sub>

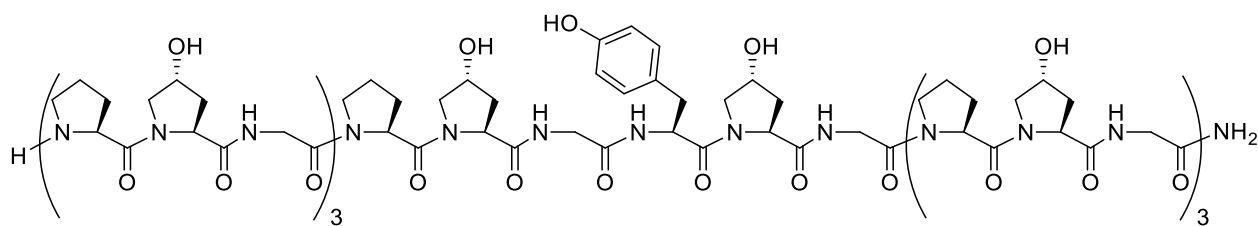

**MALDI-TOF MS:**

Calculated [M+Na]<sup>+</sup>: 2244.006

Found: 2244.472

**THERMAL DENATURATION CURVE:**

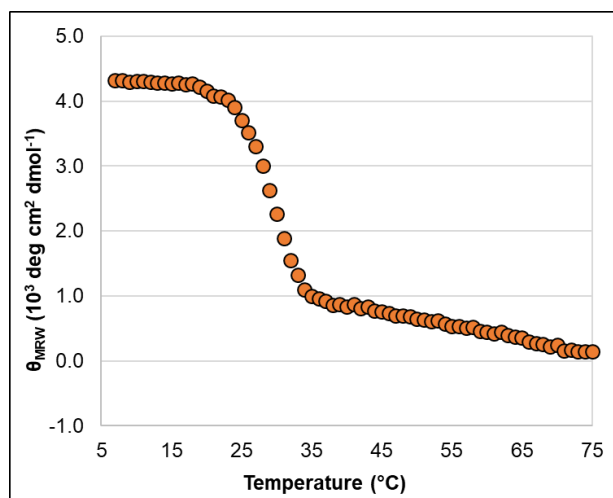

**HPLC:** 10-30% CH<sub>3</sub>CN in 0.1% TFA H<sub>2</sub>O over 30 min at 60 °C

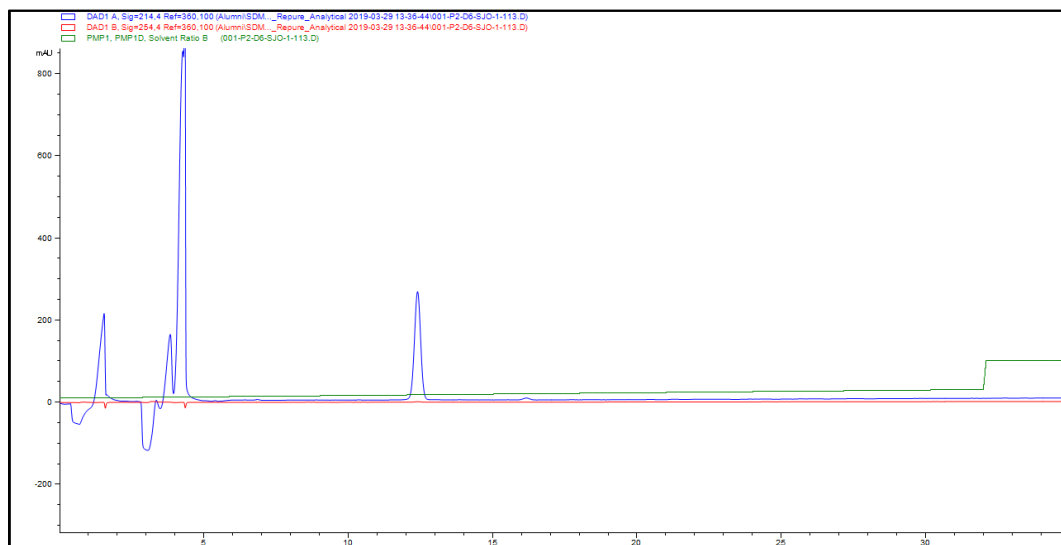

**CMP 19b:** H-(Pro-Hyp-Gly)<sub>3</sub>(Pro-Hyp-azGly)(Tyr-Hyp-Gly)(Pro-Hyp-Gly)<sub>3</sub>-NH<sub>2</sub>

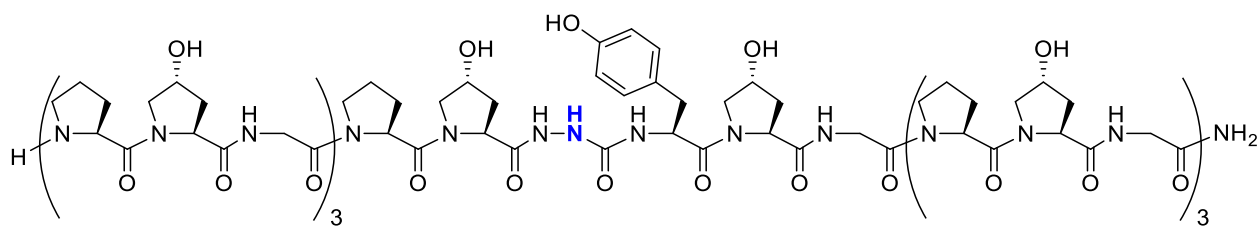

#### MALDI-TOF MS:

Calculated [M+Na]<sup>+</sup>: 2245.001

Found: 2245.397

#### THERMAL DENATURATION CURVE:

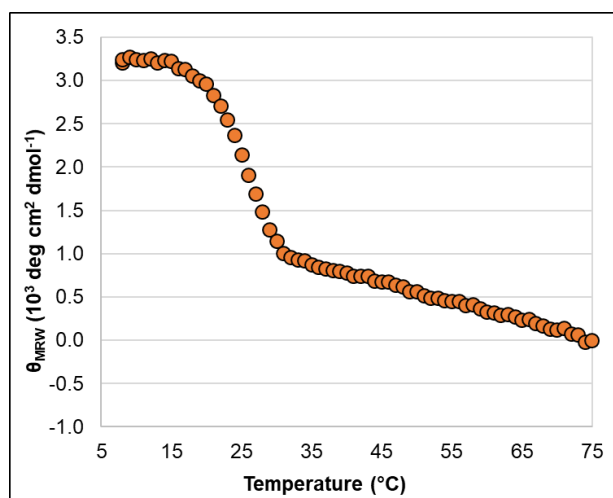

**HPLC:** 10-30% CH<sub>3</sub>CN in 0.1% TFA H<sub>2</sub>O over 30 min at 60 °C

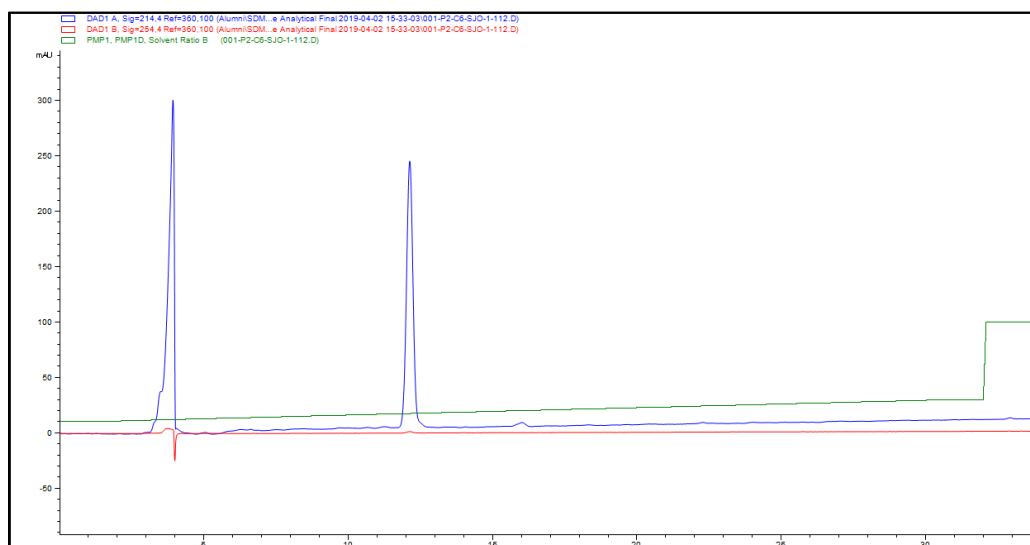

CMP **20a**: H-(Pro-Hyp-Gly)<sub>3</sub>(Pro-Hyp-Gly)(**Trp**-Hyp-Gly)(Pro-Hyp-Gly)<sub>3</sub>-NH<sub>2</sub>

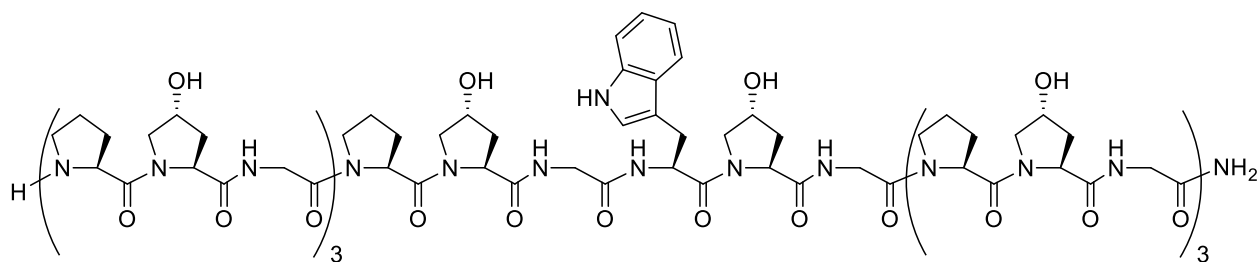

#### MALDI-TOF MS:

Calculated [M+Na]<sup>+</sup>: 2267.022

Found: 2267.650

#### THERMAL DENATURATION CURVE:

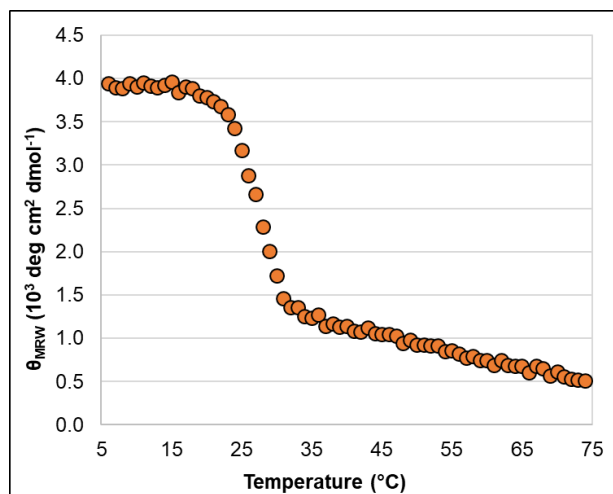

HPLC: 10-30% CH<sub>3</sub>CN in 0.1% TFA H<sub>2</sub>O over 30 min at 60 °C

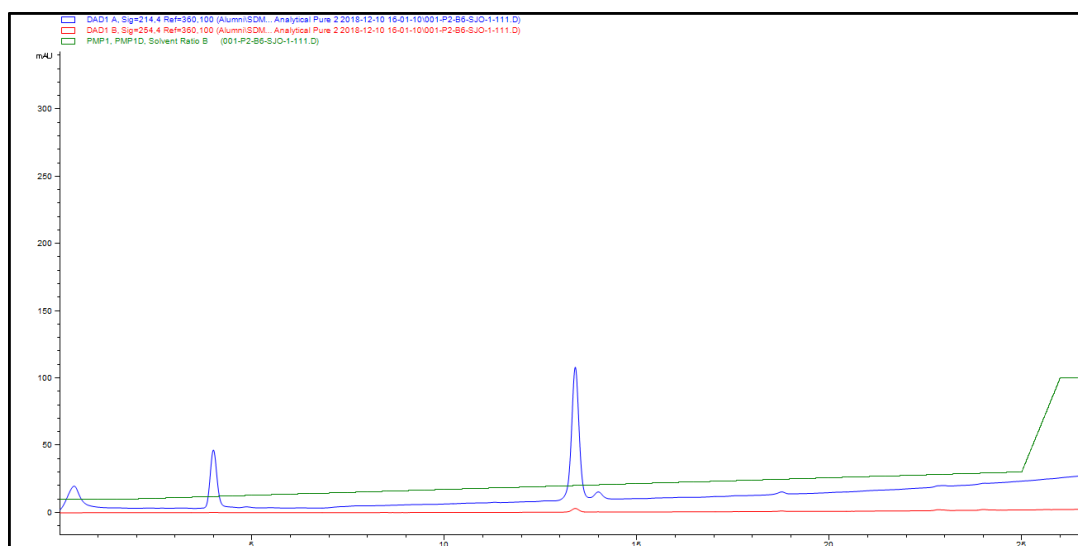

**CMP 20b:** H-(Pro-Hyp-Gly)<sub>3</sub>(Pro-Hyp-azGly)(Trp-Hyp-Gly)(Pro-Hyp-Gly)<sub>3</sub>-NH<sub>2</sub>

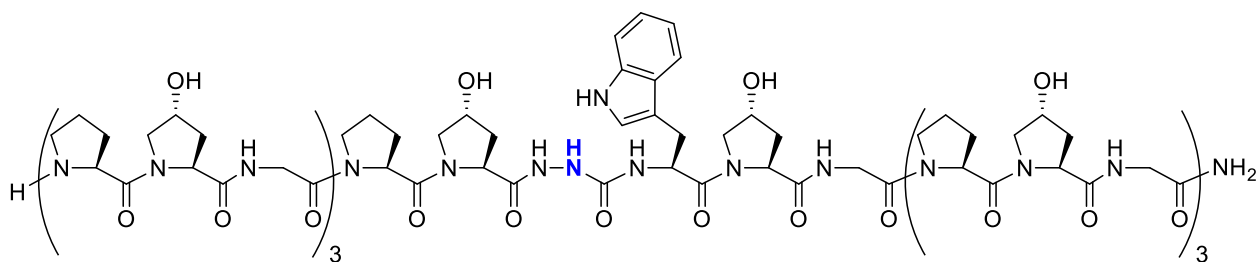

#### MALDI-TOF MS:

Calculated [M+Na]<sup>+</sup>: 2268.017

Found: 2268.590

#### THERMAL DENATURATION CURVE:

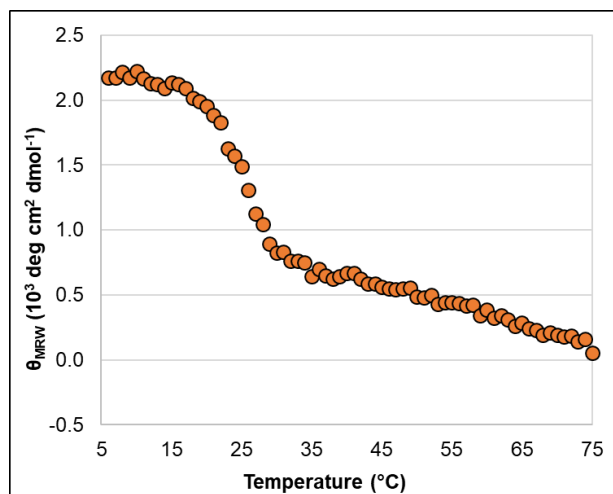

**HPLC:** 10-30% CH<sub>3</sub>CN in 0.1% TFA H<sub>2</sub>O over 30 min at 60 °C

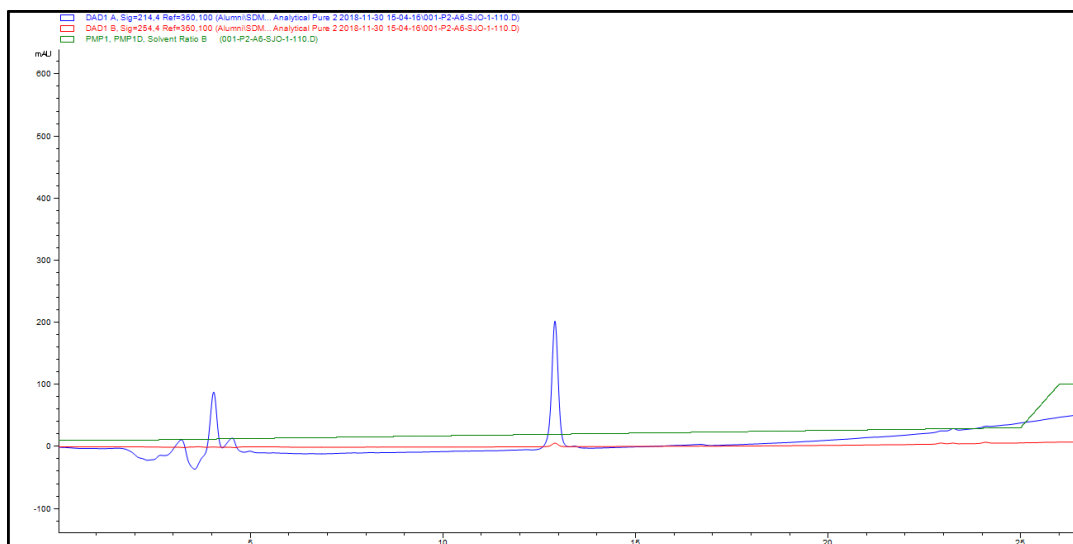

CMP **20c**: H-(Pro-Hyp-Gly)(Pro-Hyp-azGly)(Pro-Hyp-Gly)<sub>2</sub>(Trp-Hyp-Gly)(Pro-Hyp-Gly)(Pro-Hyp-azGly)(Pro-Hyp-Gly)-NH<sub>2</sub>

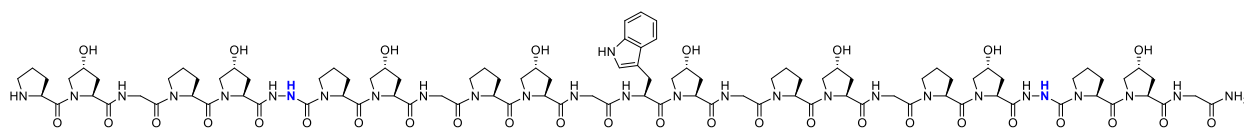

#### MALDI-TOF MS:

Calculated [M+Na]<sup>+</sup>: 2269.012

Found: 2269.127

#### THERMAL DENATURATION CURVE:

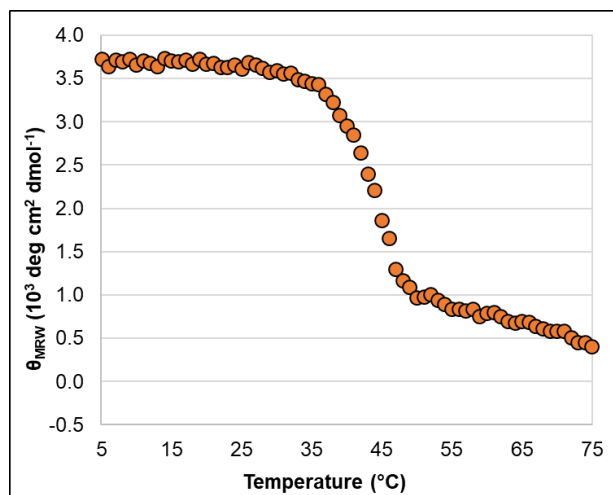

HPLC: 1-25% CH<sub>3</sub>CN in 0.1% TFA H<sub>2</sub>O over 30 min at 60 °C

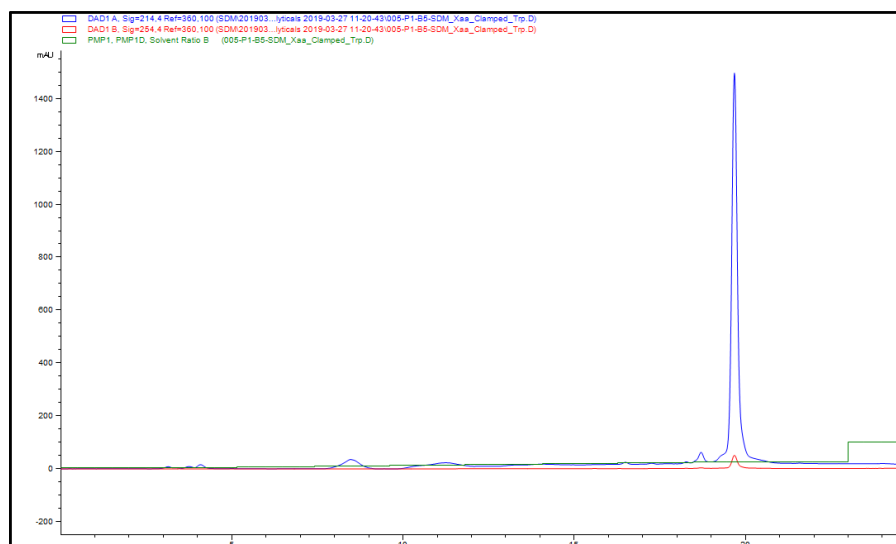

**CMP 21a:** H-(Pro-Hyp-Gly)<sub>3</sub>(Pro-Hyp-Gly)(**His**-Hyp-Gly)(Pro-Hyp-Gly)<sub>3</sub>-NH<sub>2</sub>

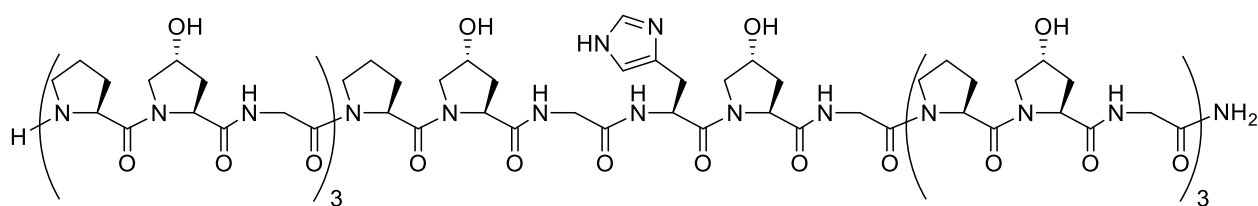

#### MALDI-TOF MS:

Calculated [M+Na]<sup>+</sup>: 2218.001

Found: 2218.164

#### THERMAL DENATURATION CURVE:

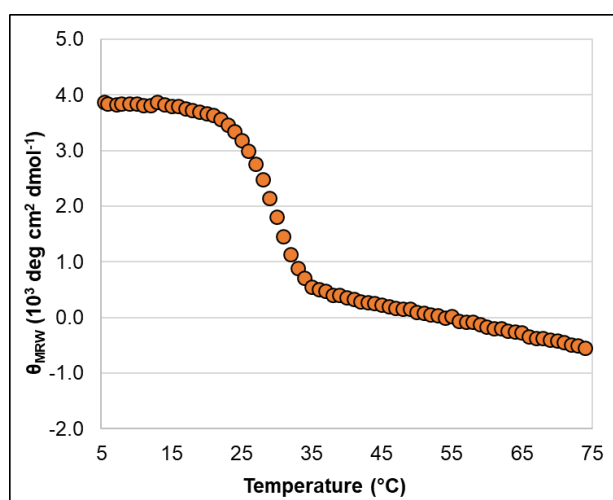

**HPLC:** 1-25% CH<sub>3</sub>CN in 0.1% TFA H<sub>2</sub>O over 30 min at 60 °C

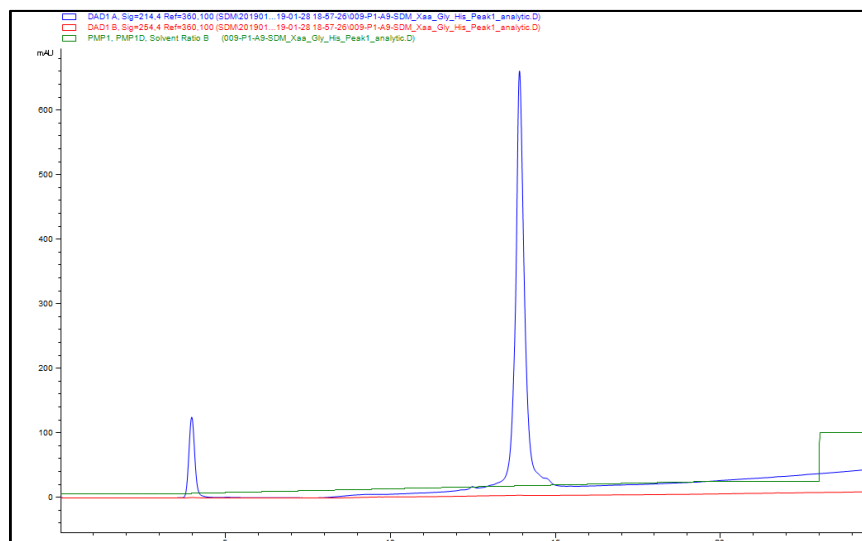

**CMP 21b:** H-(Pro-Hyp-Gly)<sub>3</sub>(Pro-Hyp-azGly)(His-Hyp-Gly)(Pro-Hyp-Gly)<sub>3</sub>-NH<sub>2</sub>

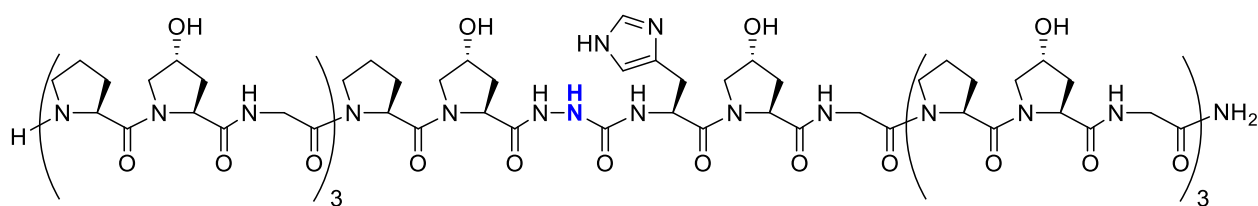

#### MALDI-TOF MS:

Calculated [M+Na]<sup>+</sup>: 2218.996

Found: 2219.201

#### THERMAL DENATURATION CURVE:

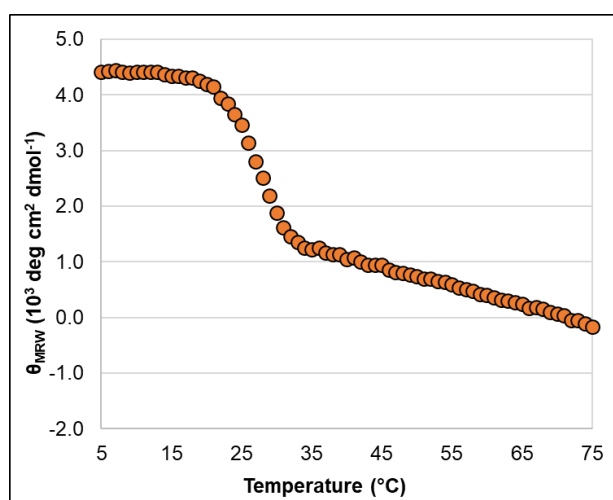

**HPLC:** 1-25% CH<sub>3</sub>CN in 0.1% TFA H<sub>2</sub>O over 30 min at 60 °C

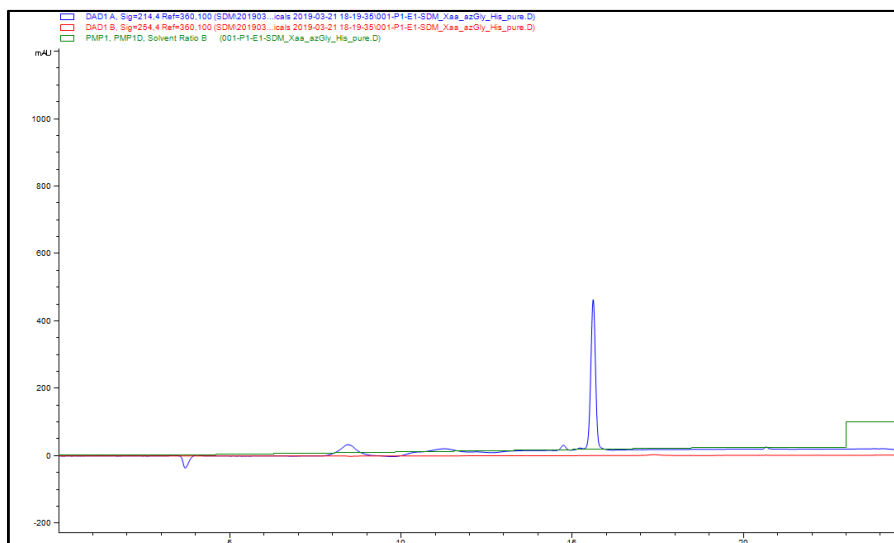

**CMP 22a:** H-(Pro-Hyp-Gly)<sub>3</sub>(Pro-Hyp-Gly)(**NmetG**-Hyp-Gly)(Pro-Hyp-Gly)<sub>3</sub>-NH<sub>2</sub>

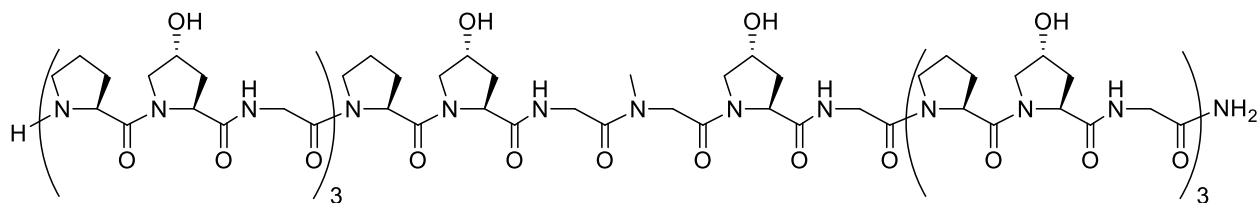

#### MALDI-TOF MS:

Calculated [M+Na]<sup>+</sup>: 2151.980

Found: 2151.954

#### THERMAL DENATURATION CURVE:

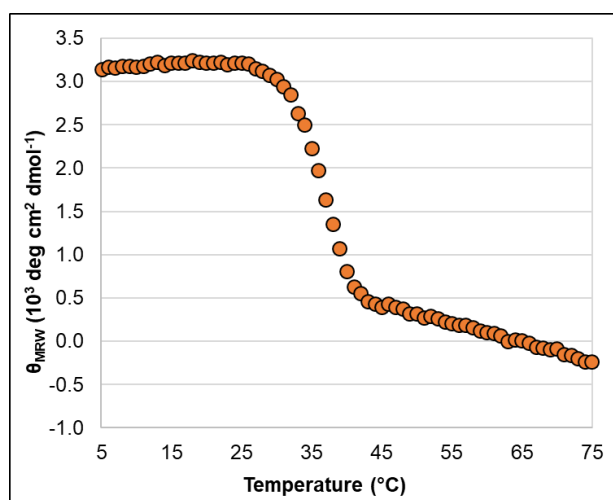

**HPLC:** 1-25% CH<sub>3</sub>CN in 0.1% TFA H<sub>2</sub>O over 30 min at 60 °C

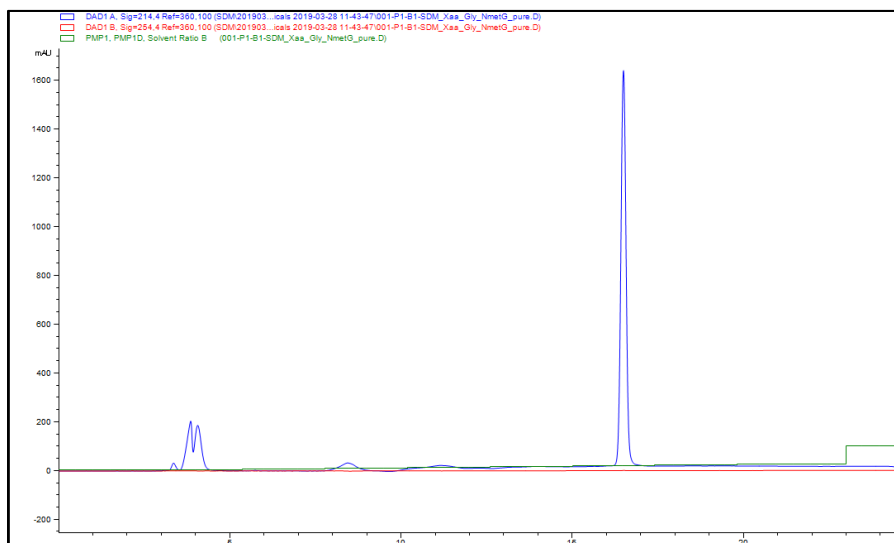

**CMP 22b:** H-(Pro-Hyp-Gly)<sub>3</sub>(Pro-Hyp-azGly)(NmetG-Hyp-Gly)(Pro-Hyp-Gly)<sub>3</sub>-NH<sub>2</sub>

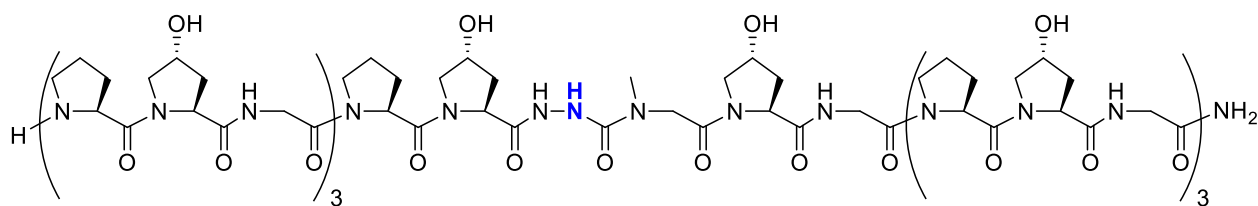

#### MALDI-TOF MS:

Calculated [M+Na]<sup>+</sup>: 2152.975

Found: 2153.509

#### THERMAL DENATURATION CURVE:

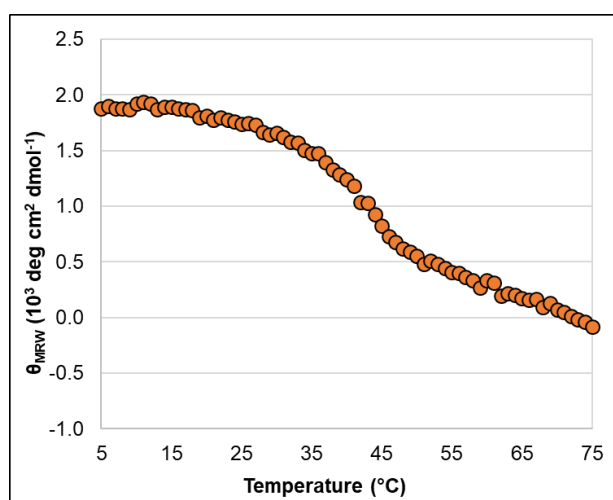

**HPLC:** 1-25% CH<sub>3</sub>CN in 0.1% TFA H<sub>2</sub>O over 30 min at 60 °C

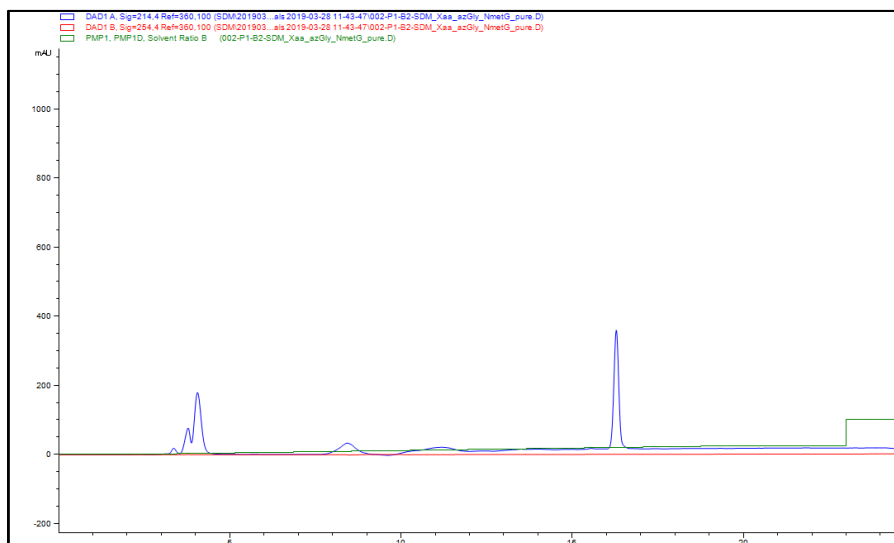

CMP **23a**: H-(Pro-Hyp-Gly)<sub>3</sub>(Pro-Hyp-Gly)(**NethylG**-Hyp-Gly)(Pro-Hyp-Gly)<sub>3</sub>-NH<sub>2</sub>

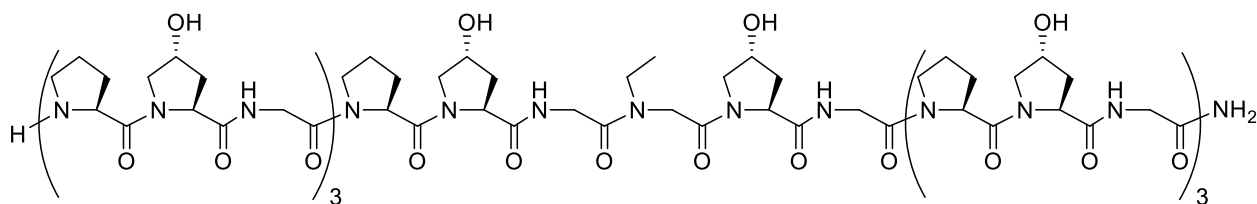

#### MALDI-TOF MS:

Calculated [M+Na]<sup>+</sup>: 2165.995

Found: 2165.470

#### THERMAL DENATURATION CURVE:

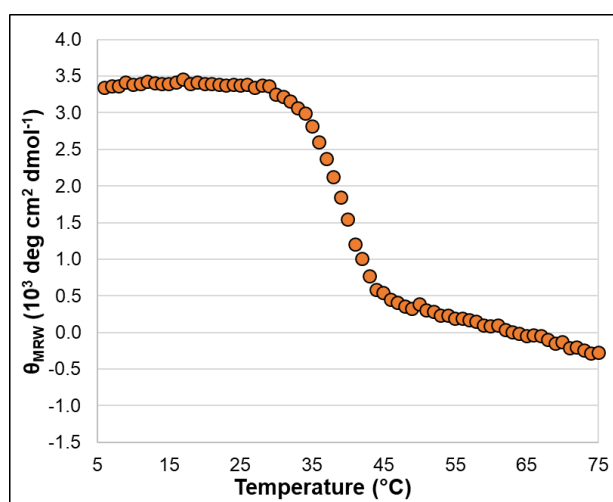

HPLC: 5-35% CH<sub>3</sub>CN in 0.1% TFA H<sub>2</sub>O over 30 min at 80 °C

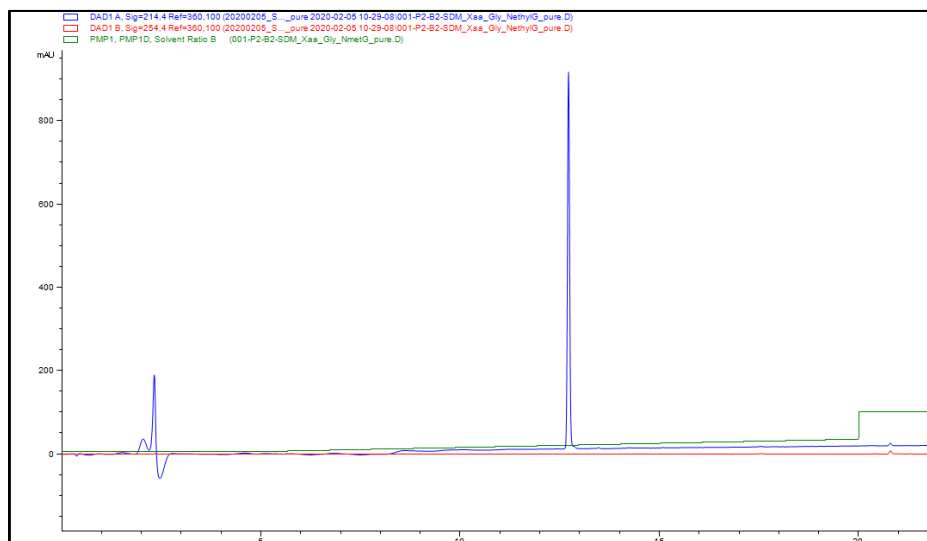

**CMP 23b:** H-(Pro-Hyp-Gly)<sub>3</sub>(Pro-Hyp-azGly)(NethylG-Hyp-Gly)(Pro-Hyp-Gly)<sub>3</sub>-NH<sub>2</sub>

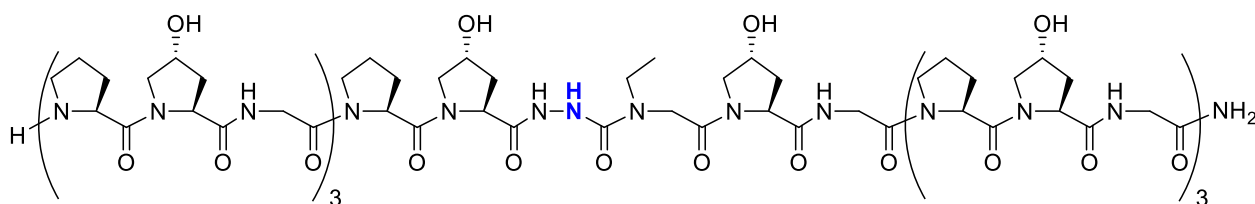

#### MALDI-TOF MS:

Calculated [M+Na]<sup>+</sup>: 2166.990

Found: 2167.335

#### THERMAL DENATURATION CURVE:

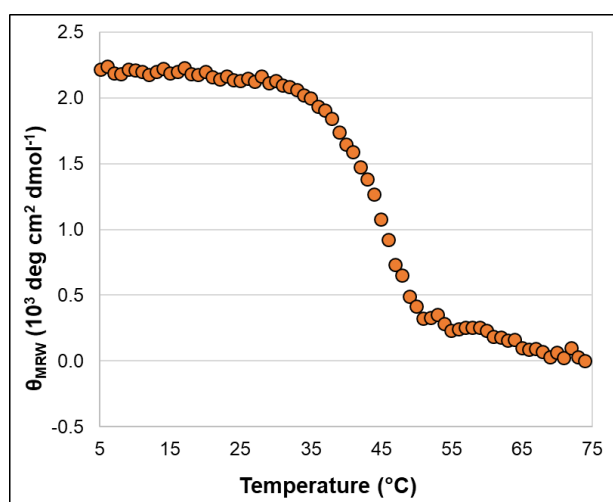

**HPLC:** 1-25% CH<sub>3</sub>CN in 0.1% TFA H<sub>2</sub>O over 30 min at 60 °C

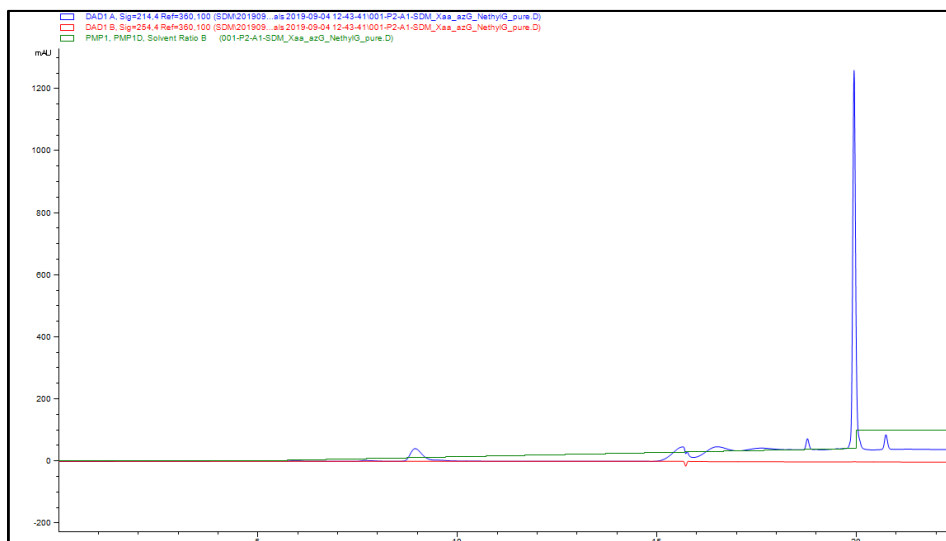

**CMP 24:** H-(Pro-Hyp-Gly)<sub>2</sub>(Pro-Arg-Gly)(Pro-Hyp-Gly)<sub>2</sub>(**Val**-Hyp-Gly)(Pro-Hyp-Gly)<sub>2</sub>-(BrF-Hyp-Gly)-(Pro-Hyp-Gly)-NH<sub>2</sub>

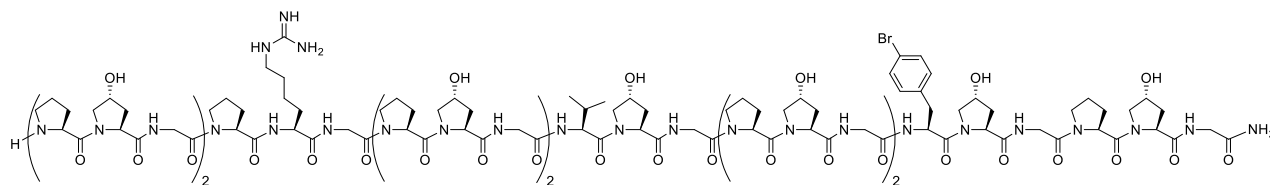

#### MALDI-TOF MS:

Calculated [M+Na]<sup>+</sup>: 2887.232

Found: 2887.088

#### Representative Crystal:

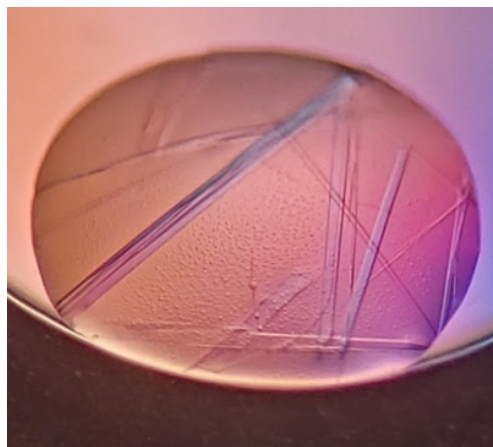

**HPLC:** 5-35% CH<sub>3</sub>CN in 0.1% TFA H<sub>2</sub>O over 30 min at 80 °C

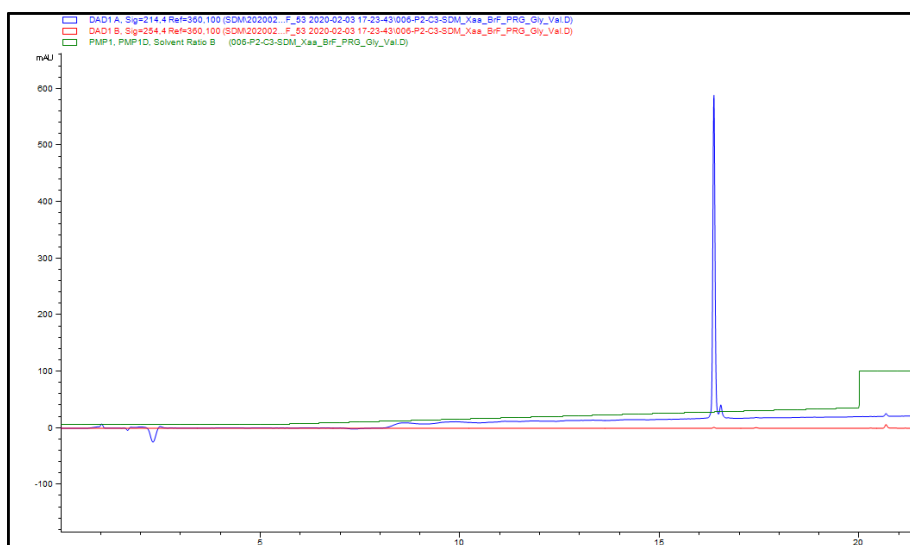

**CMP 25:** H-(Pro-Hyp-Gly)<sub>2</sub>(Pro-Arg-Gly)(Pro-Hyp-Gly)<sub>3</sub>(NmetG-Hyp-Gly)(Pro-Hyp-Gly)<sub>2</sub>-NH<sub>2</sub>

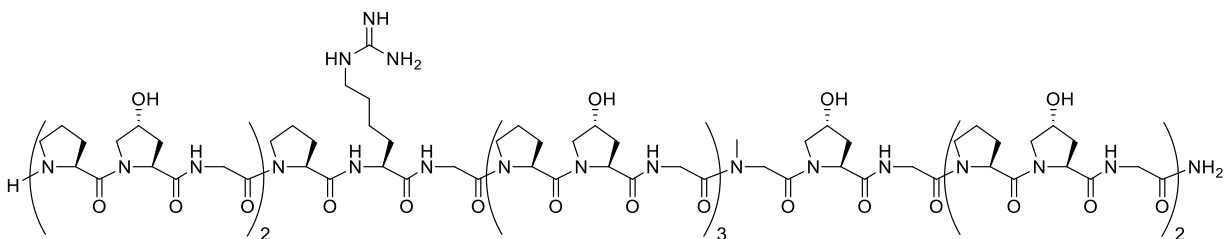

#### MALDI-TOF MS:

Calculated [M+Na]<sup>+</sup>: 2462.155

Found: 2462.236

#### Representative Crystal:

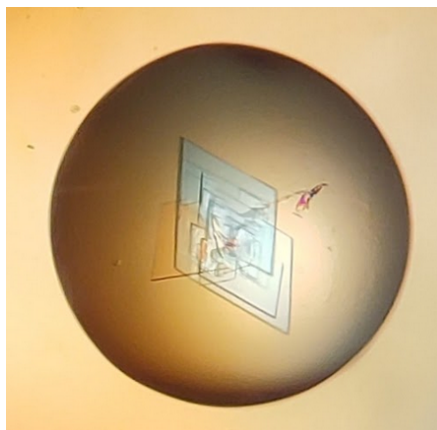

**HPLC:** 5-35% CH<sub>3</sub>CN in 0.1% TFA H<sub>2</sub>O over 30 min at 80 °C

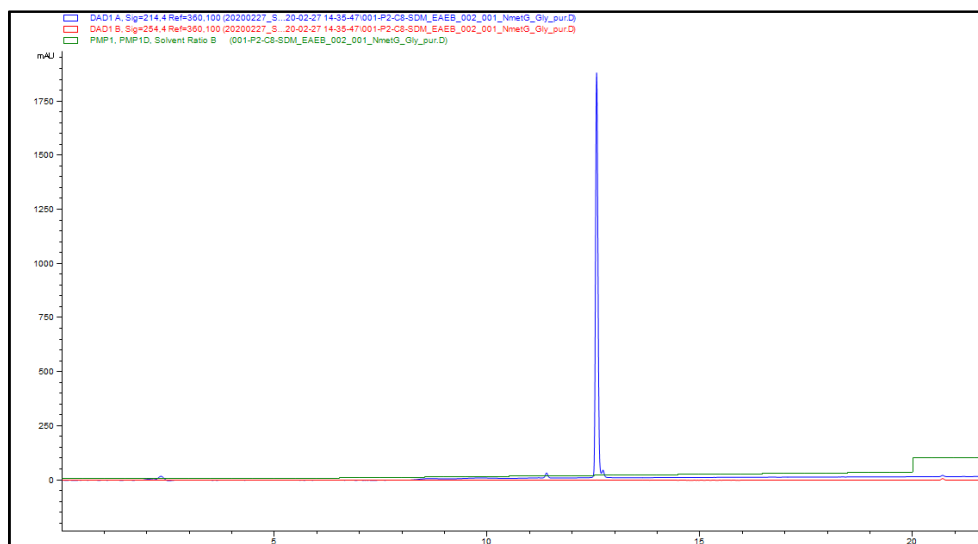

## REFERENCES

1. Zhang, Y., Malamakal, R. M. & Chenoweth, D. M. Aza-Glycine Induces Collagen Hyperstability. *J. Am. Chem. Soc.* **137**, 12422–12425 (2015).
2. Zhang, Y., Herling, M. & Chenoweth, D. M. General Solution for Stabilizing Triple Helical Collagen. *J. Am. Chem. Soc.* **138**, 9751–9754 (2016).
3. Engel, J., Chen, H.-T., Prockop, D. J. & Klump, H. The triple helix coil conversion of collagen-like polytripeptides in aqueous and nonaqueous solvents. Comparison of the thermodynamic parameters and the binding of water to (L-Pro-L-Pro-Gly) *n* and (L-Pro-L-Hyp-Gly) *n*. *Biopolymers* **16**, 601–622 (1977).
4. Okuyama, K., Haga, M., Noguchi, K. & Tanaka, T. Preferred side-chain conformation of arginine residues in a triple-helical structure: Preferred Side-Chain Conformation of Arg in Collagen Helix. *Biopolymers* **101**, 1000–1009 (2014).
5. Kabsch, W. XDS. *Acta Crystallogr. Sect. D* **66**, 125–132 (2010).
6. Battye, T. G. G., Kontogiannis, L., Johnson, O., Powell, H. R. & Leslie, A. G. W. iMOSFLM: a new graphical interface for diffraction-image processing with it MOSFLM. *Acta Crystallogr. Sect. D* **67**, 271–281 (2011).
7. Evans, P. R. & Murshudov, G. N. How good are my data and what is the resolution? *Acta Crystallogr. D Biol. Crystallogr.* **69**, 1204–1214 (2013).
8. Winn, M. D. *et al.* Overview of the it CCP4 suite and current developments. *Acta Crystallogr. Sect. D* **67**, 235–242 (2011).
9. McCoy, A. J. *et al.* Phaser crystallographic software. *J. Appl. Crystallogr.* **40**, 658–674 (2007).
10. Moriarty, N. W., Grosse-Kunstleve, R. W. & Adams, P. D. electronic Ligand Builder and Optimization Workbench (it eLBOW): a tool for ligand coordinate and restraint generation. *Acta Crystallogr. Sect. D* **65**, 1074–1080 (2009).
11. Adams, P. D. *et al.* PHENIX: a comprehensive Python-based system for macromolecular structure solution. *Acta Crystallogr. Sect. D* **66**, 213–221 (2010).
12. Emsley, P. & Cowtan, K. Coot: model-building tools for molecular graphics. *Acta Crystallogr. Sect. D* **60**, 2126–2132 (2004).
13. Pettersen, E. F. *et al.* UCSF Chimera - A visualization system for exploratory research and analysis. *J. Comput. Chem.* **25**, 1605–1612 (2004).
